# Supplementary material for: Conductas irracionales: entrevista a Dan Ariely
Source: Springer Nature journal article supplement (doi:10.1038/nchem.2083), 2009-01-01
Supplement: 41557_2014_BFnchem2083_MOESM69_ESM.pdf [file 41557_2014_BFnchem2083_MOESM69_ESM.pdf]

## DNA Brick Crystals with Prescribed Depths

## Supplementary Information 2 - Sequences

## Contents

|                                                                         |           |
|-------------------------------------------------------------------------|-----------|
| <b>S1 Sequences of one-dimensional DNA-bundle crystals (Z-crystals)</b> | <b>2</b>  |
| S1.1 Z-6H×6H×32B-cuboid crystal sequences                               | 2         |
| S1.2 Z-8H×8H×32B-cuboid crystal sequences                               | 3         |
| S1.3 Z-10H×10H×32B-cuboid crystal sequences                             | 5         |
| S1.4 Z-6H×6H×128B-spiral crystal sequences                              | 8         |
| S1.5 Z-43H×32B-triangle crystal sequences                               | 12        |
| S1.6 Z-44H×32B-hexagon crystal sequences                                | 14        |
| S1.7 Z-56H×32B-tunnel crystal sequences                                 | 16        |
| S1.8 Z-60H×64B-tunnel crystal sequences                                 | 18        |
| S1.9 Z-108H×32B-tunnel crystal sequences                                | 21        |
| <b>S2 Sequences of one-dimensional X-crystals</b>                       | <b>24</b> |
| S2.1 X-6H×6H×64B-cuboid crystal sequences                               | 24        |
| S2.2 X-32H×64B-pore crystal sequences                                   | 27        |
| <b>S3 Two-dimensional DNA-multilayer crystals (ZX-crystals)</b>         | <b>30</b> |
| S3.1 ZX-4H×4H×32B-cuboid crystal sequences                              | 30        |
| S3.2 ZX-4H×6H×32B-cuboid crystal sequences                              | 31        |
| S3.3 ZX-4H×10H×32B-cuboid crystal sequences                             | 32        |
| S3.4 ZX-4H×20H×32B-cuboid crystal sequences                             | 34        |
| S3.5 ZX-32H×64B-channel crystal sequences                               | 37        |
| S3.6 ZX-32H×64B-cross-channel crystal sequences                         | 39        |
| S3.7 ZX-6H×6H×64B-pore crystal sequences                                | 41        |
| S3.8 ZX-96H×64B-cross-tunnel crystal sequences                          | 43        |
| S3.9 ZX-4H×6H×96B-channel crystal sequences                             | 49        |
| <b>S4 Two-dimensional DNA-forest crystals (XY-crystals)</b>             | <b>51</b> |
| S4.1 XY-48H×64B-pore crystal sequences                                  | 51        |
| S4.2 XY-64H×64B-pore crystal sequences                                  | 55        |
| S4.3 XY-4H×4H×32B-tube crystal sequences                                | 59        |
| S4.4 XY-4H×4H×32B-cuboid crystal using alternating DNA-bricks sequences | 60        |
| S4.5 XY-4H×4H×64B-cuboid crystal sequences                              | 61        |
| S4.6 XY-4H×4H×128B-cuboid crystal sequences                             | 63        |
| S4.7 XY-4H×4H×192B-cuboid crystal sequences                             | 66        |
| S4.8 XY-4H×4H×256B-cuboid crystal sequences                             | 69        |
| S4.9 XY-32H×64B-pore crystal sequences                                  | 73        |
| S4.10 XY-32H×128B-pore crystal sequences                                | 76        |
| S4.11 XY-8H×4H×96B-channel crystal sequences                            | 80        |
| <b>S5 Offset Two-dimensional crystals</b>                               | <b>83</b> |
| S5.1 Offset-ZX-6H×6H×64B-cuboid crystal sequence                        | 83        |

**Note: all sequences are marked by their 5' ends corresponding to the design diagrams.**

### S1.1 Z-6H×6H×32B-cuboid crystal sequences

|                                                    |       |
|----------------------------------------------------|-------|
| CCAGGTTAAGTGGCTCAATCATACTCACGGTTAACTGTTGTGCCTAT    | 1,23  |
| GTTTACTTAGGGATGGTACGAACTCAACGCAC                   | 1,39  |
| GCTCGGGTAGTCTCAAGAAGATAGAGACATA                    | 3,23  |
| AATTCGCTAAACCGGAAAAAGTATCCGCATCTC                  | 3,39  |
| ACTCAGTGATCGAGTATTCATGTGCCTTTTCGAACGGTGACACACTT    | 5,39  |
| GTGTTCAATCAGAGTAGCGGAAATATGGCCGC                   | 7,23  |
| TTCGGTGCGCAGCGGGCCGCTGTAACGCTTAATCAGCCCGGGCTTTT    | 7,39  |
| GCTAATACGCTGAGCGATGCTGTTGTTGCGGG                   | 9,23  |
| GTTTCTGAACCGAAACCGGGCTAATGAAGCC                    | 9,39  |
| GTGACCCAGAGACTGTCTGATGCACCGGGAGCCAGCCACTTAGCTGT    | 11,23 |
| GTCAGTGTGATCGCGAGTTCCTCTAGCTAGGGTGATGCCAAAAGGT     | 13,23 |
| GGATATGGAGCTGGAACGGCTCTGATTTCTAG                   | 13,39 |
| TGACCTGGTATAATGGCGGAGCTACCTGACCT                   | 15,23 |
| CAATCATACTGCCACGGAAGGATTCATCCCC                    | 15,39 |
| TTAAGAATGATCGCACAGTCTTTGAGATGTTGAACATCTTTTGGTTG    | 17,39 |
| GCGTAAAGATCTCGCATTCTGGTGCCAAAAC                    | 19,23 |
| GCCGACTCGTTCAAGCACTATTATCTGGCTATAAAAAGATGTCTGTCAG  | 19,39 |
| CCAAAGCTTAGCATAAAGCGGCTGGACGACCC                   | 21,23 |
| GCCGTGCGACGACTGACCGTCGAGCCCTGCGC                   | 21,39 |
| GACAAAACGCATATCCTCGGCCCGCAAATTAATAGTCGATTACGCTTC   | 23,23 |
| GCCTAAAGGTCTTCACGGTAATCGGGGGTGACTCCGGCCTCCTTGG     | 25,23 |
| TATATTAGCTTACCCTCGCGTGGCAGCTCT                     | 25,39 |
| ACGACTCGTCGAACGAGGACTGTTCTACATAG                   | 27,23 |
| TGACTTGGACGAGGTTTCACTGGGCGCTATAC                   | 27,39 |
| AGGAACTCGAGGGGCTCCTGTCTGTGAGCCCAGCGACCACTTCTG      | 29,39 |
| GAGAAAGATGCGGTGGCAGTAGTTGTGATTAG                   | 31,23 |
| CTTGGGGGTGATATACCTCACTAACTCCTTCTAATGTGACTAAGCGT    | 31,39 |
| TAACCTCAAAGGAAACCGATATCCATATC                      | 33,23 |
| GATGTAAGCGGACATCTATGCGCCGATATCC                    | 33,39 |
| GTTCAAACCTAGGGGGCTTCTGACCAAAGCTCATGAGAATTGTAACAG   | 35,23 |
| GTATGATTATAGGACACAACAGTTAACCGTGAGGGGTACCTCCCGGT    | 0,15  |
| CTATCTTCGTGCGTTGAGTTTCGTATATGCTCTGTATTAGCGTTCGGT   | 2,15  |
| CACCGTTCGAGATGCGGATACCTTAAAGTGTGATGAACACCCCGCTGC   | 4,15  |
| GGGCTGATTAAGCGTTCCTGAGTGAAAAGGGACATGAATACTCGAT     | 6,15  |
| ACAGGCGGAAAAGCCAAAGACTGTGCGATCA                    | 6,31  |
| ATTTCCGCGGTTTCATAGCGAATTTGAGACTACCCGAGCTCCGGTTT    | 8,15  |
| TAGCCCGGGCGGCCATCCAGGTCAGTGGGACG                   | 8,31  |
| AACAGCATAACAGCTAAAAGTAAACGAGCCACTTAACCTGGCCATCCCT  | 10,15 |
| GTGGCTGGCCCGCAACACACTGACTTCCAGCT                   | 10,31 |
| GAGGGAACACCTTTTGCATCAGACAGTCTCT                    | 12,15 |
| GGCATCACCTAGCTACGTTTGTCTTAATTTG                    | 12,31 |
| TAGTCCGCTAGAAATTCAGAAACCGCTCAGC                    | 14,15 |
| CAGAGCCGAGGTCAGGAGCTTGGGTCAGTCGT                   | 14,31 |
| AGATGTTCCGGGATGAGCACCGAATACTCTGA                   | 16,15 |
| ATCCTTCCAACCAAACCTTACGCGCTTGAAC                    | 16,31 |
| CATCTTTTATAGCCAGTCTTAAAAACATCTC                    | 18,15 |
| ATAATAGTCTGACAGAGACAGGGAGCCCCTCG                   | 18,31 |
| CACCAGAAGCGCAGGGTATGATTGCCATTATA                   | 20,15 |
| CTCGACGGAGTTTGGCGAGTCGTAACCTCGT                    | 20,31 |
| CCAGCCGCGAAGCGTACCATATCCTCGCGATC                   | 22,15 |
| ATCGACTAGGGGTCTGCTTTAGGCTGGGTAAG                   | 22,31 |
| ATTACCGTCCAAGGAGGCGGGCCGAGGATATG                   | 24,15 |
| GCCGGAGTACCCCGGTTTGAACGAGCTTTGGTCAGAAGCCCCCTA      | 24,31 |
| AACAGTCCAGACGTGCCGACGGCTTATGCTA                    | 26,15 |
| CACGCGAGCTATGTAGTGGAGTTAGATGTCGCTTACATCGTTTCCCT    | 26,31 |
| GTCGCTGGGTATAGCGGAGTCGGCTGCGAGAT                   | 28,15 |
| CCCAGTGACAGAAGTGTCTTTCTGTATATACCCCCAAGCCACCGCA     | 28,31 |
| TAGTGAGACGCTTAGTCACATAGAAGGAGTAGTTTCCCTGCTCGACA    | 30,31 |
| GGCGCATACTAATCACAACCTACTGGGATATCGCCAAGTCATCGTTTCCA | 32,31 |
| AATTCCTCAGAAATAGGGATAGCTGCTGTTTACCTAATATAGGAAGGAC  | 34,31 |

## S1.2 Z-8H×8H×32B-cuboid crystal sequences

|                                                    |       |
|----------------------------------------------------|-------|
| CCAGGTTAAGTGGCTCAATCATACTCACGGTAACTGTTGTGTCCTAT    | 1,23  |
| GTTTACTTAGGGATGGTACGAACTCAACGCAC                   | 1,39  |
| GCTCGGGTAGTCTCAAGAAGATAGAGAGCATA                   | 3,23  |
| AATTCGCTAAACCGGAAAAGTATCCGCATCTC                   | 3,39  |
| ACTCAGTGATCGAGTATTCATGTCGCCCTTTTC                  | 5,23  |
| GAACGGTGACACACTTGTGTTCAATCAGAGTA                   | 5,39  |
| GCGGAAATATGGCCGCTTCGGTGCGCAGCGGGCCCTGTAACGCTTA     | 7,39  |
| ATCAGCCCCGGGCTTTTGCTAATACGCTGAGCG                  | 9,23  |
| ATGCTGTTGTTGCGGGGTTTCTGAACCGGAACCCGGGCTAATGAAGCC   | 9,39  |
| GTGACCCAGAGACTGTCTGATGCACCGGGAG                    | 11,23 |
| CCAGCCACTTAGCTGTGTGTCAGTGTGATCGCGA                 | 11,39 |
| GTCCCTCTAGCTAGGGTGATGCCAAAAGGGT                    | 13,23 |
| GGATATGGAGCTGGAACGGCTCTGATTTCTAG                   | 13,39 |
| TGACCTGGTATAATGGCGGAGCTACCTGACCTCAATCATACTGCCAC    | 15,23 |
| GGAAGGATTCATCCCTTTAAGAATGATCGCACAGTCTTTGAGATGTT    | 17,23 |
| GAACATCTTTTGGTTGGCGTAAAGATCTCGCA                   | 17,39 |
| TTCTGGTGCCAAAACCTGCCGACTCGTTCAAGC                  | 19,23 |
| ACTATTATCTGGCTATAAAAGATGTCTGTGTCAG                 | 19,39 |
| CCCAAGCTTAGCATAAGCGGCTGGACGACCCC                   | 21,23 |
| GCCGTGCGACGACTGACCGTCGAGCCCTGCGC                   | 21,39 |
| GACAAAACGCATATCCTCGGCCCGCAAATTAATAGTCGATTACGCTTC   | 23,39 |
| GCCTAAAGGTCTTCCACGGTAATCGGGGGTG                    | 25,23 |
| ACTCCGGCCTCCTTGGTATATTAGCTTACCCACTCGCGTGGCAGCTCT   | 25,39 |
| ACGACTCGTGAACGAGGACTGTTCTACATAG                    | 27,23 |
| TGACTTGGACGAGGTTTCACTGGGCGCTATAC                   | 27,39 |
| AGGAAACTCGAGGGGCTCCCTGTCTGTGTCGAGC                 | 29,23 |
| CCAGCGACCACTTCTGGAGAAAAGATGCGGTGG                  | 29,39 |
| CAGTAGTTGTGATTAGCTTGGGGGTGATATACCTCACTAAACTCCTTC   | 31,23 |
| TAATGTGACTAAGCGTAACTCCAAAGGAAACCAGCTATCCCATATTC    | 33,23 |
| GATGTAAGCGGACATCTATGCGCCCGATATCC                   | 33,39 |
| GTTCAAACCTAGGGGGCTTCTGACCAAAGCTCA                  | 35,23 |
| TGAGAATTGTAAACAGGAACAGCTTAGAGCAG                   | 35,39 |
| TCAAGTTCGGATACGCTACCTATGGACGGGGA                   | 37,23 |
| TATGCGACACCATGATCCGGATGAGTTATGAA                   | 37,39 |
| GATCGTCATTGGGATATAACAATCTCGAAGTAAAGCATAGCACCTGCG   | 39,39 |
| AAGATAGGGTCACAGCAGTAATACCTCTACCT                   | 41,23 |
| TGTTGGACGTAAGCGTGAATAACGACCAGAAAAGCACGAGGATTATCA   | 41,39 |
| CGTGACCTCGAAATAATCGTTAGTTTCTCGA                    | 43,23 |
| CTGTTCCGAAACAGGCAGCGGTAGCCTCCCAC                   | 43,39 |
| TTAACCTATGCCTTGGTAACTGATTTTCTCCT                   | 45,23 |
| GGTTCGCTAGCTGATCTATGGTCCTTAATAT                    | 45,39 |
| AACCCTCGGAGGCAAGGGGAGAGGGTGA AACAGGCCACCTGGCTCGGG  | 47,23 |
| GAGTGCCCCCTCGGCAGCCGCCTCGGTTATACTCGTCAAGCCTGCTTT   | 49,23 |
| CCATAGCTAACCCGATTGTGATTCCACGTGA                    | 49,39 |
| GTCGTACTTAAAGCAAACGTGGGAGTGCCCGA                   | 51,23 |
| GCGTCTGAGGTATGGTTTACCCACTATGTTGT                   | 51,39 |
| CTCAAGTGCTAACAGTACTAATATCCATAAC                    | 53,23 |
| TGTGCACGTCAGGGATTCTACCGGTGGCCGT                    | 53,39 |
| TGCTACATCAGTTTCTTGCACCTCTGGGGAAACTATACTTACGCACT    | 55,39 |
| GGTTTGGAGGGATTAGGCAATTGCTAGGTTGC                   | 57,23 |
| ATTGTAGGCACAATTTTGTATTGATCACATACATGGGCAATAAAGCT    | 57,39 |
| GTAGCCTGAGGCGCGCAGCTGCACCGTGTAC                    | 59,23 |
| CTTGATATTGAGGGACACCTCGTCAATTCGGAT                  | 59,39 |
| AAACCATACTGAGGGCAGTGGGCGAGATCGGC                   | 61,23 |
| TAATCATTAGTGCTCCCTTAGTTAGTTCATAG                   | 61,39 |
| TTCATTAGGGGCGGAAATGGGCTGGTGCCCCACGTACAGTAACCAACC   | 63,23 |
| GTATGATTATAGGACACACAGTTAACCTGACCAGGTCAAGGTCAAGG    | 0,15  |
| CTATCTTCGTGCGTTGAGTTTCGTATATGCTCTGAGGGAACTTCCAGCT  | 2,15  |
| GACATGAAGAGATGCGGATACTTTGAAAAGCGGGGTCACACAGCTAA    | 4,15  |
| ACAGGCGGTACTCTGAATGAACACTAAGCGTTGGGCTGATCCCGCAAC   | 6,15  |
| TAGCCCGGGTTCGGTATTTCCGCCCCGTGCGCACCGAAGCGGCCAT     | 8,15  |
| TCAGAAAACGGCTTCATGCGGGCCGAGGATATG                  | 8,31  |
| GTATTAGCTCGGATCCACCGTTCTACTCGATCACTGAGTAAGTGTGT    | 10,15 |
| ACACTGACCGCTCAGCAGCTTGGGTCACTCGT                   | 10,31 |
| GCATCAGACTAGAAAATAGCGAATTTTGTAGACTACCCGAGCTCCGGTTT | 12,15 |
| CAGAGCCGCTCCCGGTACCAGAAAATAGCCAG                   | 12,31 |

|                                                   |       |
|---------------------------------------------------|-------|
| GGCATCACGTGGGACGAAGTAAACGAGCCACTTAACTGGCCATCCCT   | 14,15 |
| TATGATTGACCCTTTTATCCTTCCCAACCAAA                  | 14,31 |
| TTCTTAAAAACATCTCTAGCTCCGCCATTATA                  | 16,15 |
| AAAGACTGTGCGATCAAACACTGGTATATCA                   | 16,31 |
| GAGTCGGCTGCGAGATCCATATCCCCTAGCTA                  | 18,15 |
| CTTTACGCGCTTGAACAGTTTCTCAGAAGTG                   | 18,31 |
| CCAGCCGCTGACAGAGTGGCTGGCAGTCTCT                   | 20,15 |
| CATCTTTTGGGGTCGTCGAGTCGTAACCTCGT                  | 20,31 |
| ATCGACTAGCGCAGGGAACAGCATAAAAGCCC                  | 22,15 |
| CTCGACGGGAAGCGTACTTTAGGCCCAAGGAG                  | 22,31 |
| CACGCGAGTGGGTAAGCGTTTGTCTTAATTTG                  | 24,15 |
| CTAATATAAGACGTGCAGATTGTATATCCCAA                  | 24,31 |
| ATTACCGTGTATAGCGCGCACGGCTTATGCTA                  | 26,15 |
| CCCAGTGACACCCCGGAACCTTGAATCATGGT                  | 26,31 |
| AACAGTCCCACCGCAATAATAGTAGTTTTGG                   | 28,15 |
| TCTTCTCCTATGTAGGTTTGAACCTGTTTAC                   | 28,31 |
| GACAGGGAGAAGGAGTAGATGTTTCGGGGATGA                 | 30,15 |
| TTAGTGAGGCTCGACATCACATTAGATGTCCG                  | 30,31 |
| TGGAGTTAGAATATGGCCCCAAGCTAATCAC                   | 32,15 |
| GATAGCTGGTTTCTTCGAGGGTTTGTTCAC                    | 32,31 |
| GGTCAGAAGGATATCGGTCGCTGGGCCCTCG                   | 34,15 |
| GGCGCATATGAGCTTTTAGGTTAAATCAGCTA                  | 34,31 |
| CATAGGTAAGTCTTACCAAGTCATCGTTTGA                   | 36,15 |
| AGCTGTTCTCCCGTCGGTACACGGCCTGTTT                   | 36,31 |
| GCTATGCTTTCATAACGCCGGAGTGGAAGGAC                  | 38,15 |
| TCATCCGGCGCAGGGTCTATCTTACGCTTAC                   | 38,31 |
| CTCGTGCTTCTGGTCTGACGATCTTACTTCG                   | 40,15 |
| GTTATTTCTGATAATCGAGTGCAAAGAACTG                   | 40,31 |
| GTATTACTGTGGGAGGGTCGCATAGCGTATCC                  | 42,15 |
| CTACCGCTAGGTAGAGCACTTGAGATCCCTGA                  | 42,31 |
| CTAACGATATATTAAGAATTCTCAGCCCCCTA                  | 44,15 |
| GACCATAGTCGAGAAAAGTACGACACCATACC                  | 44,31 |
| ATCAGTTACCCGAGCCCTTACATCACGCTTAG                  | 46,15 |
| AGGTGGCCAGGAGAAAGGGCACTCATCGGGT                   | 46,31 |
| GAGGCGGCAAAGCAGGCCTCTCCCTTGCCCT                   | 48,15 |
| CTTGACGAGTATAACCCTAATGAATGGGGACCAGCCCATTCCGCC     | 48,31 |
| TCCCACGTTACGTGGGCGGAACCCCAAGGCA                   | 50,15 |
| AATGCACATCGGGCACTATGGTTTGGAGCACTAATGATTAGCCCTCAG  | 50,31 |
| TAATTAGTACAACATACGGAACAGTATTTTGA                  | 52,15 |
| GTGGGTAAGTTATGGACAGGCTACGTCCCTCAATATCAAGGCGGCCT   | 52,31 |
| AGTATAGTACGGCCACGTCCAACAGCTGTGAC                  | 54,15 |
| CGGTGAGAAAGTGCATCCAAACCAAATGTGCCTACAATCTAATCCC    | 54,31 |
| CGAATCAAAGCTTTATTGCCATGTATGTGATATGTAGCATTCCCCAG   | 56,31 |
| GACGAGGTGCAACCTAGCAATTGCATCCGAATCGTGCAAACTGTTAG   | 58,31 |
| TAACATAAGGTGACACGGTGCAGCTCTATGAACTCAGACGCTTGCTTGA | 60,31 |
| ACTGTACGGCCGATCTCGCCCACTGGTTGGTTAGCTATGGTGCCGAGG  | 62,31 |

## S1.3 Z-10H×10H×32B-cuboid crystal sequences

|                                                   |       |
|---------------------------------------------------|-------|
| CCAGGTTAAGTGGCTCAATCATACTCACGGTAACTGTTGTGTCCTAT   | 1,23  |
| GTTTACTTAGGGATGGTACGAACTCAACGCAC                  | 1,39  |
| GCTCGGGTAGTCTCAAGAAGATAGAGAGCATA                  | 3,23  |
| AATTCGCTAAACCGGAAAAGTATCCGCATCTC                  | 3,39  |
| ACTCAGTGATCGAGTATTATGTCGCCTTTTC                   | 5,23  |
| GAACGGTGACACACTTGTGTTCAATCAGAGTA                  | 5,39  |
| GCGGAAATATGGCCGCTTCGGTGCGCAGCGGG                  | 7,23  |
| CCGCTGTAAACGCTTAATCAGCCCGGGCTTTT                  | 7,39  |
| GCTAATACGCTGAGCGATGCTGTTGTTGCGGGTTCGAAACCGGAAC    | 9,39  |
| CCGGGCTAATGAAGCCGTGACCCAGAGACTG                   | 11,23 |
| TCTGATGCACCGGAGCCAGCCACTTAGCTGTGTCAGTGTGATCGCGA   | 11,39 |
| GTTCCCTCTAGCTAGGGTGTATGCCAAAAGGGT                 | 13,23 |
| GGATATGGAGCTGGAACGGCTCTGATTTCTAG                  | 13,39 |
| TGACCTGGTATAATGGCGGAGCTACCTGACCT                  | 15,23 |
| CAATCATACTGCCACGGAAGGATTATCCCC                    | 15,39 |
| TTAAGAATGATCGCACAGTCTTTGAGATGTT                   | 17,23 |
| GAACATCTTTGGTTGGCGTAAAGATCTCGCA                   | 17,39 |
| TTCTGGTGCCAAAAGTCCGACTCGTTCAAGCACTATTATCTGGCTAT   | 19,23 |
| AAAAGATGTCTGTGACGCCAAGCTTAGCATAAGCGGTGGACGACCCC   | 21,23 |
| GCCGTGCGACGACTGACCGTGCAGCCCTGCGC                  | 21,39 |
| GACAAACGCATATCCTCGGCCGCCAAATTA                    | 23,23 |
| TAGTCGATTACGCTTCGCCTAAAGGTCCTTCC                  | 23,39 |
| ACGGTAATCGGGGGTACTCCGGCTCCTTGG                    | 25,23 |
| TATATTAGCTTACCCACTCGCGTGGCAGTCT                   | 25,39 |
| ACGACTCGTGAACGAGGACTGTTCTACATAG                   | 27,23 |
| TGACTTGGACGAGGTTTCACTGGGCGCTATAC                  | 27,39 |
| AGGAAACTCGAGGGGCTCCCTGTCTGTGAGCCCAGCGACCACTTCTG   | 29,39 |
| GAGAAAGATGCGGTGGCAGTAGTTGTGATTAG                  | 31,23 |
| CTTGGGGGTGATATACCTCACTAAACTCCTTCTAATGTGACTAAGCGT  | 31,39 |
| TAACCTCAAAGGAAACCAGCTATCCCATATTC                  | 33,23 |
| GATGTAAGCGGACATCTATGCGCCCGATATCC                  | 33,39 |
| GTTCAAAGTGGGGGCTTCTGACCAAAGCTCA                   | 35,23 |
| TGAGAATTGTAAACAGGAACAGCTTAGAGCAG                  | 35,39 |
| TCAAAGTTCGGATACGCTACCTATGGACGGGGA                 | 37,23 |
| TATGCGACACCATGATCCGGATGAGTTATGAA                  | 37,39 |
| GATCGTCATTGGGATATACAATCTCGAAGTAAAGCATAGCACCCCTGCG | 39,23 |
| AAGATAGGGTCACAGCAGTAATACCTCTACCTTGTGGACGTAAGCGT   | 41,23 |
| GAAATAACGACCAGAAAGCAGAGGATTATCA                   | 41,39 |
| CGTGTACCTCGAAATAATCGTTAGTTTCTCGA                  | 43,23 |
| CTGTTCCGAAACAGGACGGTAGCCTCCCAC                    | 43,39 |
| TTAACCTATGCCTTGGTAACTGATTTTCTCCT                  | 45,23 |
| GGTTCGCTAGCTGATCTATGGTCCTTAATAT                   | 45,39 |
| AACCCTCGGAGGCAAGGGGAGAGGGTGAAACA                  | 47,23 |
| GGCCACCTGGCTCGGGAGTGCCCCCTCGGCA                   | 47,39 |
| GCCGCTCGGTTATACTCGTCAAGCCTGCTTTCATAGCTAACCCGAT    | 49,39 |
| TGTGCATTCCACGTGAGTCTACTTAAAGCAA                   | 51,23 |
| ACGTGGGAGTGCCCGAGCGTCTGAGGTATGGTTTACCACTATGTTGT   | 51,39 |
| CTCAAGTGCTAACAGTACTAATTATCCATAAC                  | 53,23 |
| TGTGCACGTCAGGGATTCTACCGGTGGCCGT                   | 53,39 |
| TGCTACATCAGTTTCTTTCACCTCCTGGGGAA                  | 55,23 |
| ACTATACTTACGCACTGGTTTGGAGGGATTAG                  | 55,39 |
| GCAATTGCTAGGTTGCATTGTAGGCACAATTT                  | 57,23 |
| TTGATTCGATCACATACATGGGCAATAAAGCT                  | 57,39 |
| GTAGCCTGAGGCGCGCAGCTGCACCGTGTACCTTGATATTGAGGGAC   | 59,23 |
| ACCTCGTCAATTCGGATAAACATACTGAGGGCAGTGGGCGAGATCGGC  | 61,23 |
| TAATCATTAGTGTCCCTTAGTTAGTTCATAG                   | 61,39 |
| TTCATTAGGGGCGGAAATGGGCTGGTGCCCA                   | 63,23 |
| CGTACAGTAACCAACCGGTGTACCTGTGGGTA                  | 63,39 |
| GGGCCGAGCGCTGGGCTTACATGTGCAAGTGA                  | 65,23 |
| AATATATGACTTGGTCGACCAGATCTGCTAGA                  | 65,39 |
| AACCACCAACATCCTCCTTGACACCTTTCAAT                  | 67,23 |
| TTTTAGTAAACACCAACAGAGCTGAACTTCC                   | 67,39 |
| CATGGTCGTTCTACTGTCTGATGATCATAGGATCAAACATAAATACAGC | 69,39 |
| GTACCGCCAGTTCTTGTCTTATTGGCGATCG                   | 71,23 |
| TGCATTCCAATGTTTGTGATGGCCGCTGGCTTATTAAGACGGCCGGTGT | 71,39 |
| AACCACATAAAGTCTCCGCCTCCGGTAGTCA                   | 73,23 |

|                                                   |       |
|---------------------------------------------------|-------|
| ACGCGGAACGTAATGGCAGAAAGTCTATACCC                  | 73,39 |
| GACAAAAACAGATTTGTACCGGGGTGAACAGC                  | 75,23 |
| ACGTGCGGCTTCTCTGTATCGCCTTGTGTAT                   | 75,39 |
| TATACTTTGCGGGGGGGTTCGAGCGCTCCACT                  | 77,23 |
| GTAGTGGCCGGCCATCGTGGACTAGAAAAGCGC                 | 77,39 |
| CGGCAATCTGAATATCGCTACCTCCGATACGCGAACCCAGAACCATTTA | 79,23 |
| AGAGTAGGGGCAGTGCAGCAAAACAGTGGGACATCTCGGAAAGGTG    | 81,23 |
| TCCCAAGTGAAGTAAAAAAGGAATTATGAGA                   | 81,39 |
| TCATGTGGGATCCTAAAGTTTCTGGTAGACCT                  | 83,23 |
| CGTAGGCTAGAGCGGTGATATCCACGGTACAT                  | 83,39 |
| TCGTTTACTGCACGGAACGAGAGTGTGGCAT                   | 85,23 |
| AAGCAAGAGAAAACCTAACTTGGGGACTAAGAT                 | 85,39 |
| CGTTGCGAATTTTCGCGGATTTCGCATGTAGC                  | 87,23 |
| CGAACGAGATCGTCTAGACGACGGATCTCCT                   | 87,39 |
| GCATGCCGGTAGCACCGTCAAATATGCGTGTCTTTAACGCTTTAGACC  | 89,39 |
| CAGCTTGACGCAAGACGCTAATCACTGGGCAG                  | 91,23 |
| GGTCTAGGTTGCAGAAAACCTACCCCTAAGCAGCGTAGTAAGGGTTA   | 91,39 |
| CAAGTTCTGCGGCGGTGTACGAATGAGTCC                    | 93,23 |
| GGCCTTGACATGACATTCTCCACCCGTCCAA                   | 93,39 |
| CACCAGCAGGATGTCGAGCCCAACTTGACA                    | 95,23 |
| GTAGTACAGTATCTTTTTTCATGGCGGCGATG                  | 95,39 |
| TCGCCGTTTGTCTGCGTGCCTACGGCTTTTAT                  | 97,23 |
| ATAGCGTAGACCGGACAACCCCGTAAATCGTA                  | 97,39 |
| AGAGTCGTTATGCCCCCGGTTCTGCTAGAGTGGGACTGGATCAGATG   | 99,23 |
| GTATGATTATAGGACACAACAGTTAACCGTGACACCAGAAGCTTGAAC  | 0,15  |
| CTATCTTCGTGCGTTGAGTTCGTATATGCTCTTCTTAAACAACCCAAA  | 2,15  |
| GACATGAAGAGATGCGGATACCTTTGAAAAGGCCAGGTCAAGTGGGACG | 4,15  |
| GCACCGAATACTCTGAATGAACACCCCGCTGCGAGGGAACCTCCAGCT  | 6,15  |
| TCAGAAAACAAAAGCCCGGGCTGATGTTCCGGTTAGCCCGGCTCCCGGT | 8,15  |
| ACACTGACACAGCTAAGTATTAGCCCCGCAACAACAGCATCGCTCAGC  | 10,15 |
| GTGGCTGGTCGCGATCGACAGGGAGCCCTCG                   | 10,31 |
| GGGGTCACTAGAAAATACAGGCGGGCGGCCATATTCCGCTAAGCGTT   | 12,15 |
| CAGAGCCGAGTCTCTCGAGTCGTAACCTCGT                   | 12,31 |
| GGCATCACGGGATGACACCGTTCTACTCGATCACTGAGTAAGTGTGT   | 14,15 |
| ATCCTTCCACCCTTTTATTACCGTTGGGTAAG                  | 14,31 |
| TAGTCCGTGCGAGATAGCGAATTTGAGACTACCCGAGCTCCGGTTT    | 16,15 |
| CTTTACGCAGGTCAAGCGTTTGTGGAAGCGTA                  | 16,31 |
| AAAGACTGATAGCCAGAAGTAAACGAGCCACTTAACTGGCCATCCCT   | 18,15 |
| ATAATAGTAACATCTCCATCTTTTCAGTCGT                   | 18,31 |
| AGCTTGGGGGGTTCGTGAGTCGGCAGTTTTGG                  | 20,15 |
| CCAGCCGCTTATGCTATGACGATCTTACTTCG                  | 20,31 |
| GCGGGCCGGCGCAGGGAGATGTTCTGCGATCA                  | 22,15 |
| CTCGACGGTTAATTTGGAACCTGAATCATGGT                  | 22,31 |
| GCCGGAGTGGAAGGACTATGATTGCCATTATA                  | 24,15 |
| CTTTAGGCCCAAGGAGGTTTGAACCTGTTTAC                  | 24,31 |
| AACAGTCCAGACGTGCCATATCCCTAGCTA                    | 26,15 |
| CACGCGAGCTATGTAGTGGAGTTAGATGTCCG                  | 26,31 |
| GTCGCTGGGTATAGCGGCATCAGAGGCTTCAT                  | 28,15 |
| CCCAGTGACAGAAGTGTCTTCTCGTATATCA                   | 28,31 |
| TCACATTAGAAGGAGTAGTTTCTGCTCGACA                   | 30,15 |
| TTAGTGAGACGCTTAGCTTGACGAGTATAACC                  | 30,31 |
| AACTACTGGGATATCGCCAAGTCATCGTTCGA                  | 32,15 |
| GGCGCATACTAATCACCGAGGGTTCCCGAGCC                  | 32,31 |
| GATAGCTGCTGCTACTAATATACACCCCG                     | 34,15 |
| AGCTGTTTGAATATGGTAGGTTAAATCAGCTA                  | 34,31 |
| GGTCAGAATTCATAACATCGACTAAGGATATG                  | 36,15 |
| TCATCCGGTGAGCTTTGGTACACGGCCTGTTT                  | 36,31 |
| CATAGGTACGCAGGGTCCGACGGCCTGACAGA                  | 38,15 |
| GCTATGCTTCCCCGTCCCTATCTTTCTGGTC                   | 38,31 |
| GTATTACTACGCTTACAGATTGTATATCCAA                   | 40,15 |
| GTCCAACAAGGTAGAGCAGGCTACGTGACACG                  | 40,31 |
| CTAACGATTGATAATCGTCGCATAGCGTATCC                  | 42,15 |
| CTCGTGCTTCGAGAAAGCAATTGCTATGTGAT                  | 42,31 |
| ATCAGTTAGTGGGAGGAATTCTCAGCCCCCTA                  | 44,15 |
| CTACCGCTAGGAGAAAATGTAGCAAGTGCCTA                  | 44,31 |
| CCTCTCCCATATTAAGCTTACATCGTTTCTCT                  | 46,15 |
| GACCATAGTGTTCACCACTTGAGATCCCTGA                   | 46,31 |
| AGCTATGGTGCCGAGCCCCCAAGCCACCGCA                   | 48,15 |

|                                                   |       |
|---------------------------------------------------|-------|
| GGGCACTCATCGGGTTAATGCACATCGGGCAC                  | 48,31 |
| GTGGGTAAACCATACCGAGGCGGCAAAGCAGG                  | 50,15 |
| TCAGACGCACAACATATCATAACGACAGTAGAA                 | 50,31 |
| AGTACGACACGGCCACAGGTGGCCCTTGCCTC                  | 52,15 |
| CGGTGAGATTGCTTATGGTGGTTTGGGTGTT                   | 52,31 |
| TAATTAGTCTAATCCCAGGAAACCCCAAGGCA                  | 54,15 |
| TCCAAACCGTTATGGACTCGGCCCGACCAAGT                  | 54,31 |
| GAGTGCAAAGCTTTATCGGAACAGTATTTGCA                  | 56,15 |
| TGCCCATGTTCCCGAGCTAATGAAGGTTGGTT                  | 56,31 |
| CCTACAATGTCCTCAGTTATTTGCGTGTGAC                   | 58,15 |
| ATATCAAGAAATTGTGGACGAGGTGGAGCACT                  | 58,31 |
| TATGGTTTGCCGATCTGTGCAGCTGCGCGCCT                  | 60,15 |
| CGCCCACTGCCCTCAGGATTGCCGGCGTATCG                  | 60,31 |
| CAGCCCATCTATGAACCGAATCAAGCAACCTA                  | 62,15 |
| TAACTAAGTGGGGCACAGAGTATAGATGGCCG                  | 62,31 |
| ACATGTAATACCCACAAGTATAGTAGAAACTG                  | 64,15 |
| GGTACACCTCACTTGCTTTTGTGAGGAGAAG                   | 64,31 |
| GTGTCAAGTCTAGCAGCGTGCACAACGTGTTAG                 | 66,15 |
| ATCTGGTCATTGAAAGATGTGGTTCCATTACG                  | 66,31 |
| TAGTTTGAGGAAGTTCTCCACGTTACAGTGG                   | 68,15 |
| AGCTCTGTGCTGTATTGGCGGTACCAAACATT                  | 68,31 |
| CGTCTTAATAAGCCACCGACCATGTCCATGA                   | 70,15 |
| GCGGCCATACACCGGCTATTTGACGGTGCTAC                  | 70,31 |
| AATAAGGAGGGTATAAGTACTAAAAGAGGATGT                 | 72,15 |
| ACTTTCTGCGATCGCCTCGCAACGAGGACGAT                  | 72,31 |
| GGAGGCGGATACACAACATATATTGCCAGCG                   | 74,15 |
| GGCGATACTGACTACCGTAAACGATAGGTTTC                  | 74,31 |
| CCCCGGTAGCGCTTTCAGTGTACGTTCCGCC                   | 76,15 |
| TAGTCCACGCTGTTACCACATGAACCGCTCT                   | 76,31 |
| GCTCGACCTAAATGGTAATGATTAATCCGAAT                  | 78,15 |
| TCTGGTTCAGTGGAGCCCTACTCTTACTTGC                   | 78,31 |
| TTGGGTGACACCTTTCGAGGTAGCGATATTCA                  | 80,15 |
| CGAGATGTCCCACTGTACGACTCTACTCTAGCAGAACCGGGGGGCATA  | 80,31 |
| CAGAACTTCTCATAAGCCACTACCCCCGCA                    | 82,15 |
| TTCCTTTTAGGTCTACAACGGCGAGTCCGGTCTACGCTATCGCGAGCA  | 82,31 |
| ACTCTCGTATGTACCGCCGACGTCAAATCTG                   | 84,15 |
| TGGATATCATGCCAGCTGCTGGTGAAGATACTGTACTACCGACATCC   | 84,31 |
| CGAATCGCATCTTAGTTTCCGCGTACGACTTT                  | 86,15 |
| CCCCAAGTGCTACATGGGAAC TTGATGTCATGTCAAGGCCCCCGCCGA | 86,31 |
| GCGTTAAAAGGAGATCGGAATGCACAAGAACT                  | 88,15 |
| CGTCGTCTGGTCTAAATCAAGCTGTCTGCAACCTAGGACCGTCTTGCG  | 88,31 |
| GGTAGGTTTAAACCTTACTACGCTGCTTAGGGCGGCATGCAGCACGCA  | 90,31 |
| GTGGGAGACTGCCAGTGATTAGCTTGACGGCTCGTTCCGGCGAAAAT   | 92,31 |
| CCATGAAAGGACTCATTCGTACAGCATCGCCGCTTGCTTCCGTGCA    | 94,31 |
| ACGGGGTTTGTCAAGTTGTGGGCTTACGATTTAGCCTACGTTAGGATC  | 96,31 |
| CCAGTCCCATAAAAAGCCGTACGCACATCTGATACTTGGGAGCACTGCC | 98,31 |

## S1.4 Z-6H×6H×128B-spiral crystal sequences

|                                                   |        |
|---------------------------------------------------|--------|
| CCAGGTTAAGTGGCTC                                  | 0,24   |
| AATCATACTCACGGTT                                  | 1,39   |
| AACTGTTGTGCTCTATGTTTACTTAGGGATGGTACGAACTCAACGCAC  | 1,55   |
| GCTCGGGTAGTCTCAAGAAGATAGAGAGCAT                   | 1,71   |
| AATTCGCTAAACCGGAAAAGTATCCGCATCTCACTCAGTGATCGAGTA  | 1,87   |
| TTCATGTCGCCTTTTCGAACGGTGACACACTT                  | 1,103  |
| GTGTTCAITCAGAGTAGCGGAAAATATGGCCGCTTCGGTGCGCAGCGGG | 1,119  |
| CCGCCTGTAACGCTTAATCAGCCCGGGCTTTT                  | 1,135  |
| GCTAATACGCTGAGCG                                  | 2,40   |
| ATGCTGTTGTTGCGGGGTTTCTGAACCGGAACCCGGGCTAATGAAGCC  | 3,23   |
| GTGACCCAGAGACTGTCTGATGCACCGGGAG                   | 3,71   |
| CCAGCCACTTAGCTGTGTCAGTGTGATCGCGA                  | 3,87   |
| GTTCCCTCTAGCTAGGGTGTGCCAAAAGGGT                   | 3,103  |
| GGATATGGAGCTGGAACGGCTCTGATTTCTAG                  | 3,119  |
| TGACCTGGTATAATGG                                  | 4,24   |
| CGGAGCTACCTGACCTCAATCATACTCCACGGAAGGATTCATCCCC    | 5,39   |
| TTAAGAATGATCGCA                                   | 5,71   |
| CAGTCTTTGAGATGTTGAACATCTTTTGGTTGGCGTAAAGATCTCGCA  | 5,103  |
| TTCTGGTGCCAAAAGTCCGACTCGTTCAAGCACTATTATCTGGCTAT   | 5,135  |
| AAAAGATGTCTGTGACGCCAAGCTTAGCATAA                  | 7,23   |
| GCGGCTGGACGACCCCGCGTGCACGACTGA                    | 7,39   |
| CCGTCGAGCCCTGCGCGACAAACGCATATCCTCGGCCCGCAAATTA    | 7,71   |
| TAGTCGATTACGCTTCGCCTAAAGGTCTTCC                   | 7,87   |
| ACGGTAATCGGGGTGACTCCGGCTCCTTGGTATATTAGCTTACCCA    | 7,103  |
| CTCGCGTGGCAGTCTACGACTCGTCGAACGA                   | 7,119  |
| GGACTGTTCTACATAGTACTTGGACGAGGTTTCACTGGGCGCTATAC   | 7,135  |
| AGGAAACTCGAGGGGCTCCTGTCTGTGAGC                    | 9,55   |
| CCAGCGACCACTTCTGGAGAAAGATGCGGTGG                  | 9,71   |
| CAGTAGTTGTGATTAGCTTGGGGGTGATATAC                  | 9,87   |
| CTCACTAAACTCCTTCTAATGTGACTAAGCGT                  | 9,103  |
| TAACCTCAAAGGAAACCACTATCCATATC                     | 9,119  |
| GATGTAAGCGGACATCTATGCGCCCGATATCC                  | 9,135  |
| GTTCAAAGTGGGGCTTCTGACCAAAGCTCATGAGAATTGTAACAG     | 11,55  |
| GAACAGCTTAGAGCAGTCAAGTTCGGATACGCTACCTATGGACGGGA   | 11,87  |
| TATGCGACACCATGATCCGGATGAGTTATGAAGATCGTCATTGGGATA  | 11,119 |
| TACAATCTCGAAGTAAAGCATAGCACCCCTGCG                 | 11,135 |
| AAGATAGGGTCACAGC                                  | 12,24  |
| AGTAATACCTCTACCTTGTGGACGTAAGCGT                   | 13,39  |
| GAAATAACGACCAGAAAGCACGAGGATTATCACGTGTACCTCGAAATA  | 13,55  |
| ATCGTTAGTTTCTCGACTGTTCCGAAACAGGC                  | 13,71  |
| AGCGGTAGCCTCCACTTAACTATGCCTTGGTAACTGATTTTCTCT     | 13,87  |
| GGTCCGCTAGCTGATCTATGGTCCTTAATAT                   | 13,103 |
| AACCCTCGGAGGCAAGGGGAGAGGGTGAAACA                  | 13,119 |
| GGCCACCTGGCTCGGGAGTGCCCCCTCGGCA                   | 15,23  |
| GCCGCCTCGGTTATACTCGTCAAGCCTGCTTT                  | 15,39  |
| CCATAGCTAACCCGATTGTGATTCCAGTGCAGTACTTAAAGCAA      | 15,71  |
| ACGTGGGAGTGCCCGAGCGTCTGAGGTATGGT                  | 15,87  |
| TTACCCACTATGTTGTCTCAAGTGCTAACAGT                  | 15,103 |
| ACTAATTATCCATAACTGTGCACGTCAGGGATTCTACCGGTGGCCGT   | 15,119 |
| TGCTACATCAGTTTCTTTGCACTCCTGGGGAA                  | 15,135 |
| ACTATACTTACGCACTGGTTTGGAGGGATTAGGCAATTGCTAGGTTGC  | 17,39  |
| ATTGTAGGCACAATTTTGTGATCGATCACATACATGGGCAATAAAGCT  | 17,103 |
| GTAGCCTGAGGCGCGCAGCTGCACCGTGTACCTTGATATTGAGGGAC   | 17,135 |
| ACCTCGTCATTCGGATAAACCATACTGAGGGC                  | 19,23  |
| AGTGGGCGAGATCGGCTAATCATTAGTGCTCCCTTAGTTAGTTCATAG  | 19,39  |
| TTCATTAGGGGCGGAAATGGGCTGGTGCCCA                   | 19,55  |
| CGTACAGTAACCAACCGGTGTACCTGTGGGTAGGGCCGAGCGCTGGGC  | 19,103 |
| TTACATGTGCAAGTGAAATATATGACTTGGTC                  | 19,119 |
| GACCAGATCTGTAGAAACCAACATCCTCCTTGACACCTTCAAT       | 19,135 |
| TTTTAGTAAACACCAACAGAGCTGAACTTCC                   | 21,23  |
| CATGGTCGTTCTACTGTCTGATGATCATAGGA                  | 21,39  |
| TCAAATAAATACAGCGTACCGCCAGTTCTTG                   | 21,55  |
| TCCTTATGGCGATCGTGCATTCCAATGTTGATGGCCGCGTGGCTTA    | 21,71  |
| TAAAGACGGCCGGTGAACCACATAAAGTCGT                   | 21,87  |
| CCGCCTCCGGTAGTCAACGCGGAACGTAATGG                  | 21,103 |
| CAGAAAGTCTATACCC                                  | 21,119 |



|                                                   |        |
|---------------------------------------------------|--------|
| GACAAAAACAGATTTGTACCGGGGTGAACAGC                  | 21,135 |
| ACGTGCGGCTTCTCCT                                  | 23,23  |
| GTATCGCCTTGTGATTATACTTTGCGGGGGGGTTCGAGCGCTCCACT   | 23,55  |
| GTAGTGGCCGGCCATCGTGGACTAGAAAGCGCCGGAATCTGAATATC   | 23,87  |
| GCTACCTCCGATACGCGAACCAGAACCATTTA                  | 23,103 |
| AGAGTAGGGGCAGTGC                                  | 24,120 |
| TCAGCCAAACAGTGGGACATCTCGGAAAGGTGTCCCAAGTGCAAGTAA  | 25,23  |
| AAAAGGAATTATGAGATCATGTGGGATCCTAA                  | 25,39  |
| AGTTTCTGGTAGACCTCGTAGGCTAGAGCGGTGATATCCACGGTACAT  | 25,55  |
| TCGTTTACTGCACGGAACGAGAGTGTGGCATAAGCAAGAGAAACCTA   | 25,71  |
| ACTTGGGGACTAAGATCGTTGCGAATTTTCGCGGATTTCGCATGTAGC  | 25,87  |
| CGAACGAGATCGTCT                                   | 25,103 |
| AGACGACGGATCTCCTGCATGCCGGTAGCACC                  | 25,135 |
| GTCAAATATGCGTGCTTTAACGCTTTAGACC                   | 27,23  |
| CAGCTTGACGCAAGACGCTAATCACTGGGCAG                  | 27,39  |
| GGTCTAGGTTGCAGAAACCTACCCCTAAGC                    | 27,55  |
| AGCGTAGTAAGGGTTACAAGTTCCTGCGGCGG                  | 27,71  |
| CTGTACGAATGAGTCC                                  | 27,119 |
| GGCCTTGACATGACATTCTCCACCCGTCCAA                   | 27,135 |
| CACCAGCAGGATGTGC                                  | 28,88  |
| AGCCCAAACTTGACAGTAGTACAGTATCTTTTTTCATGGCGGCGATG   | 29,39  |
| TCGCCGTTTGTCTCGCTGCGTACGGCTTTTATATAGCGTAGACCCGGAC | 29,71  |
| AACCCCGTAAATCGTA                                  | 29,103 |
| AGAGTCGTTATGCCCCCGGTTCTGCTAGAGTGGGACTGGATCAGATG   | 29,135 |
| TTCAAGTATTCGGTGACCTCCCCGATTACAA                   | 31,23  |
| CGCGTTACCAAGTAACGTATGTACGACGCGATGCGAGTGAACGGGTG   | 31,39  |
| GATGAATTTGCTTCGGGGCCAGGCGATCTAAG                  | 31,55  |
| TCTGGCGCGTGAGGACACGTAAGTTGAAGTAG                  | 31,71  |
| GAAGCTTTTTCTAGCCATAGCATCGACACTACGACCTGCTTTTCGACA  | 31,103 |
| CGGACTGCATTCTGGACAGTAACTGCATTAAC                  | 31,119 |
| TACGTGCTCCCAACATAAGTGACGTCTCAGCAGTTGAAAATTATCTC   | 31,135 |
| GATAAGCAGAAGGACCTGTATAACTGGCAAGA                  | 33,23  |
| GACAAGGCCGCTTCAGAAAAGGATAGCCGGACC                 | 33,39  |
| GTATTAATGCCGCGCCAACGGTTTCCCGGACC                  | 33,55  |
| TAGTGTCTATCAAGTCTATTCTATGAAACCAT                  | 33,71  |
| TCTCGGGTCGAGCGGGTCACTGTTGTGACCTA                  | 33,87  |
| CGAGAAGCGTATAGATGTTCCGCGCGAATAGC                  | 33,135 |
| TCACAGGCGAACTACGTATGAATTGGTTTTAAACGCTCCTCGGGAATTA | 35,23  |
| ATACGACAGGTGGCAAAACCACCTCCGATGTCAGCGCCGCATACCCATT | 35,55  |
| CACTGTGAATTTCCACACCGAGGATTCGACAGTCCATGGGATTCACCA  | 35,87  |
| AGTCTGTATACACCTGATTCCTCATGGCAGC                   | 35,103 |
| AAGTAAACGAGCCACTTAACTGGTTTTTTTTTTTTTTTGGAGCTTT    | 0,47   |
| GATACTTTGTGCGTTGAGTTCGTACCATCCCTGTTGAACGCGTATCC   | 0,79   |
| ATTTCCGCTACTCGATCACTGAGTGAGATGCGAGCTGTTCTTCATAAC  | 0,111  |
| TTTTTTTTCCCGCTGCGCACCGAAGCGGCCATGTGCGCATATTACTTCG | 0,143  |
| TTTTTTTTAACCGTGA                                  | 1,16   |
| GTATTAGCTTTTTTTT                                  | 2,47   |
| ACACTGACTATGCTCTCTATCTTCCGCTCAGCAGTTTCTCAGAAAGTG  | 2,79   |
| CAGAGCCGAAGTGTGTACCGTTCTCGCGATCAACTACTGGAAGGAGT   | 2,111  |
| TTTTTTTTAAAAGCCCGGCTGATCTAGAAATTGGAGTTAGATGTCCG   | 2,143  |
| TTTTTTTCAGTCTCT                                   | 3,48   |
| ATCCTTCCGGCTTCATTAGCCCGGATAGCCAGCACGCGAGCTATGTAG  | 4,15   |
| TTTTTTTTCCATTATACCAGTCAAGGGATGACATCTTTTGGGGTCGT   | 4,47   |
| CTTACGCCTCCCGGTGCATCAGATTTTTTTTTTTTTTGGCGAGGG     | 4,79   |
| ATAATAGTACCCTTTTGGCATCACTGCGAGATATCGACTACACCCCG   | 4,111  |
| TTTTTTTTTGGCATCA                                  | 5,48   |
| CCCAGTGAAACCTCGTCACCAGAAGTGGGACGTATGATTGAGGTCAGG  | 6,15   |
| CGCACGGCGTATAGCGTCCAAACCAGTGCCTA                  | 6,31   |
| TTTTTTTTTCAGTCTGTAGTCCGTTTTTTTT                   | 6,47   |
| CGTTTGTCTTTTTTTT                                  | 6,63   |
| GCGGGCCGAGGATATGTTCTTAAACAACAAAAGATGTTCAACATCTC   | 6,79   |
| GCCGGAGTTTAAATTTGCGAATCAAAAATTGTG                 | 6,95   |
| CTAATATAACCAAGGAGAAAGACTGGCTTGAACGAGTCGGCAGTTTTTG | 6,111  |
| CCAAGTCATGGGTAAAGGTGCAGCTGCGCGCT                  | 6,127  |
| AGCTTGGGGGATATCGTCAGAAACCCCGCAACAACAGCATTTTTTTTT  | 8,15   |
| TTTTTTTTTATGCTAAGGTGGCCGTATAACC                   | 8,31   |
| TCTTCTCTTTTTTTAATGCACAATCGGGTT                    | 8,63   |
| CTTAGGCCACCAGGGGTCACACAGCTAAGTGGCTGGCCTAGCTA      | 8,79   |

|                                                  |        |
|--------------------------------------------------|--------|
| TCACATTAGGAAGGACTCCCACGTACAACATA                 | 8,95   |
| CGAGTCGTACGCTTAGGAGGGAACCTCCAGCTCCATATCCGTTCCGGT | 8,111  |
| GGCGCATATCGTTTCGATAATTAGTAGAAAACCTG              | 8,127  |
| AATTCTCATTTTTTTTTTTTTTTTGTAGGTAGAG               | 10,31  |
| GACAGGGACTGTTTACGTATGATTATAGGACACAACAGTTTTGAGACT | 10,47  |
| CATAGGTAGCTCGACAGTTATTTCTCGAGAAA                 | 10,63  |
| CCCCCAAGTCCCGTCCACCCGAGCTCCGGTTTAGCGAATTGAAAAGGC | 10,79  |
| TGACGATCGTATATCACTACCGCTATCAGCTA                 | 10,95  |
| GATAGCTGTATCCAAGACATGAATACTCTGAATGAACACTAAGCGTT  | 10,111 |
| GCTATGCTGAATATGGCGAGGGTTTTTTTTTT                 | 10,127 |
| TTTTTTTTTCGACAGGTACAGGCGGTTTTTTTT                | 10,143 |
| AGATTGTATTTTTTTT                                 | 11,128 |
| CCTATCTTTTTTTTTTCCGCACGTCCCCCGCA                 | 12,31  |
| CTCGTGCTGCTGTGACGGTCAGAAGCCCCTA                  | 12,47  |
| GGTACACGTGATAATCGGCGATACGCGCTTC                  | 12,63  |
| TAGGTTAATATTTTCGAGAACTTGACTGCTCTA                | 12,79  |
| ATCAGTTACCAAGGCAGCCACTACGCGTATCG                 | 12,95  |
| TTTTTTTTGTTCACCCTCTCCAGGAGAAATCATCCGGATCATGGT    | 12,127 |
| GGGCACTCACGGCCACCTTACATCTTTTTTTT                 | 14,15  |
| GTCCAACATGCCGAGGTACTAAAACAGTAGAA                 | 14,31  |
| AGTACGACACGCTTACTTTTTTTTGCCCTCG                  | 14,47  |
| CGGAACAGTTGCTTATAGTTTGACGATCGCC                  | 14,63  |
| TCAGACGCGCCTGTTTGTGCTGGCTAATCAC                  | 14,79  |
| GACCATAGACCATACCCGTCTTAATGACTACC                 | 14,95  |
| CGTGCAAAATATTAAGTTAGTGAGGTTTCCTT                 | 14,111 |
| CGGTGAGAATCCCTGAACTTTCTGCAAATCTG                 | 14,127 |
| GCAATTGCTTCCCCAGAACAGTCCCTGACAGA                 | 16,15  |
| CTTGACGAGCAACCTAGACGAGGTGCCGATCT                 | 16,31  |
| TTTTTTTTAAAGCAGGCCAGCCGCTTTTTTTT                 | 16,47  |
| TGCCCATGTTTTTTTCTCGACGGGAAGCGTA                  | 16,79  |
| CACTTGAGAGCTTATTTTTTTTTTGTTGGTT                  | 16,95  |
| ATATCAAGACTGTTAGATTACCGTAGACGTGC                 | 16,111 |
| GAGTGCAAGTCCCTCAACATGTAATCTAGCAG                 | 16,127 |
| TTTTTTTTTATGTGAT                                 | 17,64  |
| GTGTCAAGGAGGATGTCAGGCTACCTAATCCC                 | 18,15  |
| AATGATTAATTGAAAGTGTACTACTGTCAAGT                 | 18,31  |
| TAACTAAGGGAGCACTAGTATAGTTTTTTTTT                 | 18,47  |
| TTTTTTTTCTATGAACCGTACGCACGCGAGCA                 | 18,63  |
| GGTACACCTTTTTTTTTTTTTTTTACGATTT                  | 18,95  |
| CTCGGCCCTACCCACACCTACAATGTGACACG                 | 18,111 |
| TGGTGGTTGCCAGCGAGAACCAGGGGGGCATA                 | 18,127 |
| TATGGTTTGCTGTTCAATGTACACCCGAGCC                  | 20,15  |
| TCATACGAGCCCTCAGTATTTGACGTCTTGCG                 | 20,31  |
| CAGCCCATTCTATGAGAGGCGGCTCACGTGG                  | 20,47  |
| GGAAATGCATGGGGCACCTAGGACCTAACCTT                 | 20,63  |
| GCGGCCATCAAACATTAGCTATGGTCGGGCAC                 | 20,79  |
| TTCCGCGTTAAGCCAC                                 | 20,95  |
| CATATATTCCATTACGGTGGGTAAGTTATGGA                 | 20,111 |
| CCCCGGTAGACCAAGTTCGTACAGATGTCATG                 | 20,127 |
| GGAGGCGGGGTATAG                                  | 21,96  |
| AGCTCTGTTTTTTTTT                                 | 22,15  |
| GCTCGACCGGAAGTCTTGCTGATCTCATAA                   | 22,31  |
| GGCGGTACAGTGGAGCGTATTACTTTCTGGTC                 | 22,47  |
| GATTGCCGCAAGAACTCAGAAACTCCCGTGCA                 | 22,63  |
| ATGTGGTTGATATTCATAACGATGTGGGAGG                  | 22,79  |
| TCTGGTTCACGACTTCCCCAAGTAGGACGAT                  | 22,95  |
| TTTTTTTTTAAATGGTGGGAACCCTTGCCCTC                 | 22,111 |
| TTTTTTTTTAGGAGAAG                                | 23,0   |
| CGAGATGTGCACTGCCCTACTCTTTTTTTTTTTTTTTTTTAAACC    | 24,15  |
| ACTTGGGACACCTTTCGCCTGTGATGACATCGGAGGTGGTTGCCACC  | 24,31  |
| AGCTACGTTACTTGCAGAGTATAATACACAA                  | 24,47  |
| TGGATATCACCGCTCTTGTGCTATCCTGCGAATCCTCGGTGTGGAAAT | 24,63  |
| TCGCAACGATGTACCGTAGTCCACGATGGCCG                 | 24,79  |
| CGAATCGCGCGAAAATTCACAGTGAGGGTGTATACGAGCTTTTTTTTT | 24,95  |
| TTTTTTTTGCTACATGGAGGTAGCTTTTTTTTT                | 24,111 |
| TTTTTTTTTAGGAGATC                                | 25,112 |
| GCGTTAAAGGTGCTACTTTTTGTCTGGGTGTT                 | 26,15  |
| CCACATGAGGTCTAAATGCTTATCCTGAAGCGGCCCTGTGCGCGCGC  | 26,31  |

|                                                  |        |
|--------------------------------------------------|--------|
| GGTAGGTTTTAGGATCCGACCATGGCTGTATT                 | 26,47  |
| ACTCTCGTGCTTAGGGATTAATACGACTTGATAGACACTACCCGCTCG | 26,63  |
| TCTTGCTTATGCCAGCAATAAGGAACACCGGC                 | 26,79  |
| TTTTTTTTTAGGTTTCACCCGAGATTTTTTTT                 | 26,95  |
| CGGCATGCTTTTTTTTTTTTTTTTATCTATACGCTTCTCGGGTCCCTC | 26,127 |
| CCATGAAATTGGACGGATCTGGTCATCCGAAT                 | 28,15  |
| TGATTAGCCATCGCCGTACTTGAATTACTTGGTAAGCGCGCCAACGA  | 28,31  |
| TACGCTATCTGCCAGCGCCACTTTCCGCCCTAATGAATTTTTTTT    | 28,47  |
| GGAACCTGGTCCGGTCAATTCATCGTCTCACGCGCCAGATTTTTTTT  | 28,63  |
| TTTTTTTCCGCCGCA                                  | 28,79  |
| TGCTGGTGTTTTTTTTTTTTTTTGGCTAGAAAAAGCTTCTCCAGAAT  | 28,95  |
| CCAGTCCCGACATCCACTGTACGTCACTTGC                  | 28,111 |
| GTGGGAGACATCTGATGCAGTCCGATGTTGGGAGCACGTATCACCGAA | 28,127 |
| TACATACGGAGATAATTTCAACTGCTGAGGAACGACTCTAAAGATAC  | 30,31  |
| ACTTACGTACCCGTTCACTCGCATCGCGTCGTGTGGGTATAAAAAGC  | 30,63  |
| TTTTTTTCTACTTCAAACGGCGATTTTTTTT                  | 30,79  |
| GATGCTATTTTTTTT                                  | 30,95  |
| CGTCACTTTGTCGAAAAGCAGGTCGTAGTGTACCGGGTTACTCTAGC  | 30,127 |
| TATCCTTTTTGTAATGCGGGGAGGGCTATTGTCAGGCCAGCACGCA   | 32,31  |
| ATAGAATACTTAGATCGCCTGGCCGGTCCGGCTCAAGCTGTCTGCAAC | 32,63  |
| TTTTTTTATGGTTTCACTACGCTTTTTTTTTT                 | 32,79  |
| CGCGAACGTTAATGCAGTACTGTTTTTTTTTTTTTTTTTTGGACTCAT | 32,127 |
| TGCGGCGCTCTTGCCAGTTATACATAATCCCCGTCGTCTCCCACTGT  | 34,31  |
| CCCATGGAGGTCCGGGAAACCGTTAATGGGTATTCCTTTTAGGTCTAC | 34,63  |
| GGAGAACTAGGTCAACAAGTGTGGTGAATGTAACGAATCTTAGT     | 34,95  |
| TTTTTTTGTGCTGCCATCTCGTTCGTTTTTTTTT               | 34,111 |
| GAGGAGCGTTTTTTTTT                                | 34,127 |
| AATTCATACGTAGTTC                                 | 35,128 |

## S1.5 Z-43H×32B-triangle crystal sequences

|                                                  |       |
|--------------------------------------------------|-------|
| CCAGGTTAAGTGGCTC                                 | 6,24  |
| AATCATACTCACGGTTAACTGTTGTGTCTATGTTTACTTAGGGATGG  | 7,39  |
| TACGAACTCAACGCACGCTCGGGTAGTCTCAAGAAGATAGAGAGCATA | 9,23  |
| AATTCGCTAAACCGGAAAAGTATCCGCATCTCACTCAGTGATCGAGTA | 9,39  |
| TTCATGTGCGCTTTTCGAACGGTGACACACTTGTGTTTCATTAGAGTA | 21,23 |
| GCGGAAATATGGCCGCTTCGGTGCGCAGCGGG                 | 21,39 |
| CCGCCTGTAACGCTTAATCAGCCCGGGCTTTTGCTAATACGCTGAGCG | 23,39 |
| ATGCTGTTGTTGCGGGGTTTCTGAACCGGAAC                 | 25,23 |
| CCGGGCTAATGAAGCCGTGACCCAGAGACTGTCTGATGCACCGGGAG  | 25,39 |
| CCAGCCACTTAGCTGTGTGACGTGTGATCGCGAGTTCCTCTAGCTAGG | 27,23 |
| GTGATGCCAAAAGGGTGGATATGGAGCTGGAA                 | 27,39 |
| CGGCTCTGATTTCTAGTGACCTGGTATAATGGCGGAGCTACCTGACCT | 35,23 |
| CAATCATACTCCACGGAAGGATTCATCCC                    | 35,39 |
| TTAAGAATGATCGCACAGTCTTTGAGATGTT                  | 37,23 |
| GAACATCTTTTGGTTGGCGTAAAGATCTCGCA                 | 37,39 |
| TCTGGTGCCAAAAGTCCGACTCGTTCAAGCACTATTATCTGGCTAT   | 39,39 |
| AAAAGATGTCTGTACGCCAAGCTTAGCATAA                  | 41,23 |
| GCGGCTGGACGACCCCGCGTGCGACGACTGACCGTCGAGCCCTGCGC  | 41,39 |
| GACAAACGCATATCTCGGCCGCCAAAATTA                   | 43,23 |
| TAGTCGATTACGCTTCGCCTAAAGGTCCTTCC                 | 43,39 |
| ACGTAATCGGGGTGACTCCGGCTCCTTGGTATATTAGCTTACCCA    | 45,23 |
| CTCGCGTGGCAGTCTACGACTCGTCGAACGA                  | 45,39 |
| GGACTGTTCTACATAGTGACTTGGACGAGGTTTACTGGGCGCTATAC  | 49,23 |
| AGGAACTCGAGGGGCTCCTGTCTGTGAGC                    | 49,39 |
| CCAGCGACCACTTCTGGAGAAAGATGCGGTGG                 | 51,23 |
| CAGTAGTTGTGATTAGCTTGGGGGTGATATAC                 | 51,39 |
| CTCACTAAACTCCTTCTAATGTGACTAAGCGT                 | 53,23 |
| TAACTCAAAGGAAACCAGCTATCCATATTC                   | 53,39 |
| GATGTAAGCGGACATCTATGCGCCGATATCCGTTCAAAGTGGGGG    | 55,39 |
| TTCTGACCAAAGCTCATGAGAATTGTAACAG                  | 57,23 |
| GAACAGCTTAGAGCAGTCAAGTTCGGATACGCTACCTATGGACGGGA  | 57,39 |
| TATGCGACACCATGATCCGGATGAGTTATGAA                 | 59,23 |
| GATCGTCATTGGGATATACAATCTCGAAGTAA                 | 59,39 |
| AGCATAGCACCCGCGAAGATAGGGTCAACAG                  | 61,23 |
| AGTAATACCTTACCTTGTGGACGTAAGCGT                   | 61,39 |
| GAAATAACGACCAGAAAGCAGGAGGATTATCACGTGTACCTCGAAATA | 63,23 |
| AAGTAAACGAGCCACTTAACTGGCCATCCCTAGTTCGTATCCGGTTT  | 6,15  |
| CACTGAGTGAGATGCGGTATGATTATAGGACACAACAGTTAACCGTGA | 8,15  |
| GATACTTTTACTCGATGGGCTGATTAAGCGTT                 | 8,31  |
| ACCCGAGCTATGCTCTCTATCTTCTTGAGACTGACATGAAGCGGCCAT | 10,15 |
| CACCGTTCTACTCTGAATGAACACAAGTGTGTGGCTGGACCCTTTT   | 20,15 |
| GTATTAGCCCCGCTGCAGCGAATTGTGCGTTG                 | 22,15 |
| GCACCGAACGCTCAGCAACAGCATGGCTTCAT                 | 22,31 |
| GCATCAGACAGTCTCTACAGGCGGAAAAGCCC                 | 24,15 |
| GGGGTACCTCCCGGTGAGTCGGCAGTTTGG                   | 24,31 |
| TCAGAAACTTCCAGCTATTCCCGCGAAAAGGC                 | 26,15 |
| CCATATCCGTTCCGGTTTCTTAAACAACAAA                  | 26,31 |
| ACACTGACCCTAGCTAGAGGGAAGTCCGATCCAGAGCCGGTGGGACG  | 28,15 |
| CCAGGTCAAGGTCAGGTAGCTCCGCCATTATAATTACCGTAGACGTGC | 34,15 |
| AAAGACTGGGGGATGAGGCATCACACAGCTAA                 | 36,15 |
| ATCCTTCCAACATCTCCGTTTGTGCAAGCGTA                 | 36,31 |
| ATAATAGTTGCGAGATTAGCCCGGCCGCAAC                  | 38,15 |
| CTTTACGCATAGCCAGCATCTTTTGGGGTTCGT                | 38,31 |
| CTCGACGGTCAGTCGTCACCAGAAGCTTGAAC                 | 40,15 |
| CGCACGGCGCGCAGGGGGCGCATAGATGTCG                  | 40,31 |
| AGCTTGGGGGAAGGACAGATGTTCTGCGATCA                 | 42,15 |
| CTTTAGGCTTATGCTATTAGTGAGGTTTCCTT                 | 42,31 |
| GCGGGCCGTCGTTTCGATATGATTGCTAGAAAT                | 44,15 |
| CGAGTCGTTTAAATTTGGTCGCTGGCTAATCAC                | 44,31 |
| GCCGGAGTTGGGTAAGCTAATATACCAAGGAGAACAGTCCGCCCTCG  | 46,15 |
| CCAAGTCAGTATAGCG                                 | 48,15 |
| CCCAGTGAAACCTCGTGTTATTTCTGATAATCCTCGTGCTTTCTGGTC | 48,31 |
| TCTTCTCGCTCGACACACGCGAGCACCCCG                   | 50,15 |
| GACAGGGACCACCGCAGCTATGCTAGGTAGAGGTATTACTCGCAGGGT | 50,31 |
| TCACATTAGTATATCAATCGACTAAGGATATG                 | 52,15 |

|                                                  |       |
|--------------------------------------------------|-------|
| CCCCAAGACGCTTAGGTCGCATATATCCCAATGACGATCATCATGGT  | 52,31 |
| GTTTGAACGAATATGGCCAGCCGCTGACAGA                  | 54,15 |
| GATAGCTGGCCCCCTAGGTCAGAACTGCTCTAAGCTGTTCTGAGCTTT | 54,31 |
| GAACTTGATCCCCGTCCATAGGTAGCGTATCCCTTACATCGGATATCG | 56,31 |
| AGATTGACTGTTTACAATTCTCATTACTTCGTGGAGTTAGAAGGAGT  | 58,31 |
| GTCCAACATTCATAACTCATCCGGACGCTTACAACACTGCAGAAGTG  | 60,31 |
| GGTACACGGCTGTGACCCTATCTTTATTCGAAGTTCCTCTATGTAG   | 62,31 |

## S1.6 Z-44H×32B-hexagon crystal sequences

|                                                    |       |
|----------------------------------------------------|-------|
| CCAGGTTAAGTGGCTCAATCATACTCACGGTAACTGTTGTGCCTAT     | 5,23  |
| GTTTACTTAGGGATGGTACGAACTCAACGCAC                   | 5,39  |
| GCTCGGGTAGTCTCAAGAAGATAGAGAGCATAAATTCGCTAAACCGGA   | 7,39  |
| AAAGTATCCGCATCTCACTCAGTGATCGAGTA                   | 9,23  |
| TTCATGTCGCCTTTTCGAACGGTGACACACTTGTGTTTCATTTCAGAGTA | 9,39  |
| CCGAAATATGGCCGCTTCGGTGCAGCGGGCCCGCTGTAACGCCTA      | 11,23 |
| ATCAGCCCGGGCTTTTGCTAATACGCTGAGCG                   | 11,39 |
| ATGCTGTTGTTGCGGGGTTTCTGAACCGGAACCCGGGCTAATGAAGCC   | 19,23 |
| GTGACCCAGAGACTGTCTGATGCACCGGGAG                    | 19,39 |
| CCAGCCACTTAGCTGTGTGCTGAGTGTGATCGCGA                | 21,23 |
| GTTCCCTCTAGCTAGGGTGATGCCAAAAGGGT                   | 21,39 |
| GGATATGGAGCTGGAACGGCTCTGATTTCTAGTGACCTGGTATAATGG   | 23,39 |
| CGGAGCTACCTGACCTCAATCATACTGCCAC                    | 25,23 |
| GGAAAGGATTATCCCCTTAAAGAATGATCGCACAGTCTTTGAGATGTT   | 25,39 |
| GAACATCTTTTGGTTGGCGTAAAGATCTCGCA                   | 27,23 |
| TTCTGGTGCCAAAACCTGCCACTCGTTCAAGC                   | 27,39 |
| ACTATTATCTGGCTATAAAAGATGTCTGTCAGCCCAAGCTTAGCATAA   | 29,23 |
| GCGGCTGGACGACCCCGCGTGCAGACTGA                      | 29,39 |
| CCGTCGAGCCCTGCGGACAAAACGCATATCCTCGGCCCGCCAAATTA    | 33,23 |
| TAGTCGATTACGCTTCGCCTAAAGGTCCTTCC                   | 33,39 |
| ACGGTAATCGGGGGTGACTCCGGCCTCCTTGG                   | 35,23 |
| TATATTAGCTTACCCACTCGCGTGGCACGTCT                   | 35,39 |
| ACGACTCGTCAACGAGGACTGTTCTACATAG                    | 37,23 |
| TGACTTGGACGAGGTTTCACTGGGCGCTATACAGGAACTCGAGGGGG    | 37,39 |
| TCCCTGTCTGTGAGCCAGCGACCACTTCTG                     | 43,23 |
| GAGAAAGATGCGGTGGCAGTAGTTGTGATTAGCTTGGGGTGATATAC    | 43,39 |
| CTCACTAAACTCCTTCTAATGTGACTAAGCGT                   | 45,23 |
| TAACCTCAAAGGAAACCAGCTATCCATATTC                    | 45,39 |
| GATGTAAGCGGACATCTATGCGCCGATATCCGTTCAAACCTAGGGGGC   | 47,23 |
| TTCTGACCAAAGCTCATGAGAATTGTAACAGGAAACAGCTTAGAGCAG   | 49,23 |
| TCAAAGTTCGGATACGCTACCTATGGACGGGA                   | 49,39 |
| TATGCGACACCATGATCCGGATGAGTTATGAA                   | 51,23 |
| GATCGTCATTGGGATATAAATCTCGAAGTAAAGCATAGCACCCCTGCG   | 51,39 |
| AAGATAGGGTCACAGCAGTAATACCTCTACCT                   | 61,23 |
| TGTTGGACGTAAGCGTGAATAACGACCAGAAAAGCAGGATTATCA      | 61,39 |
| CGTGACCTCGAAATAATCGTTAGTTTCTCGACTGTTCCGAAACAGGC    | 63,23 |
| GTATGATTATAGGACACAACAGTTAACCGTGAATTTCCGAAAAAGCCC   | 4,15  |
| AGCGAATTGTGCGTTGAGTTTCGTATCCGGTTTGATACTTTGAAAAGGC  | 6,15  |
| ATGAACACAAGTGTGTACCCGAGCTATGCTCTCTATCTTCTTGAGACT   | 8,15  |
| CACCGTTTACTCTGACAGAGCCGTTCCAGCT                    | 8,31  |
| CACTGAGTCGCTACGAAAGTAAACGAGCCACTTAACCTGGCCATCCCT   | 10,15 |
| GTATTAGCTACTCGATGTGGCTGGCCTAGCTA                   | 10,31 |
| GCACCGAATAAGCGTTACAGGCGGCCGCTGCAACAGCATCAGTCTCT    | 12,15 |
| TCAGAAACGGCTTCATTAGCCCGGTTCCGGTATAATAGTGGGGTCTG    | 18,15 |
| ACACTGACCTCCCGTGGGCTGATGCGGCCAT                    | 20,15 |
| GCATCAGATCGCGATCAGATGTTCAAGTTTGG                   | 20,31 |
| CCAGGTCAACCCTTTTGACATGAAGAGATGCG                   | 22,15 |
| GGCATCACCCATTATATAGCTCCGGGGATGA                    | 22,31 |
| TTCTTAAAAACATCTCAAAGACTGTGCGATCACCATATCCCTAGAAAT   | 24,31 |
| TATGATTGGCTTGAACGAGGGAACACAGCTAA                   | 26,15 |
| GAGTCGGCGTGGGACGCGAGTCTGTAACCTCGT                  | 26,31 |
| CTTTACGCTCAGTCGTGGGGTCAACCCGCAAC                   | 28,15 |
| CGCACGGCTGCGAGATATTACCGTTGGGTAAG                   | 28,31 |
| CATCTTTTATGCTAAGCTTGGGCTGACAGACTCGACGGGAAGCGTA     | 30,15 |
| CGTTTGTCTTAATTTGGCGGGCCGAGGATATGCTTACATCGGATATCG   | 32,15 |
| GCCGAGTGGAAGGACCCAGCCGATAGCCAG                     | 34,15 |
| CTTTAGGCCAAAGGAGTTAGTGAGGTTTCCTT                   | 34,31 |
| AACAGTCCAGACGTGCCACCAGAACAACCAA                    | 36,15 |
| CACGCGAGCTATGTAGGACAGGGACCCGCA                     | 36,31 |
| CCCAGTGAGCCCCCTGAGTTTCTGTATAGCGATCCTTCCAGGTCAGG    | 38,31 |
| AACTACTGGTATATACCCCCAAGCTAATCACCCAAGTATCGTTTCGA    | 42,31 |
| GTCGCTGGGAATATGGCTAATATACACCCCG                    | 44,15 |
| GATAGCTGCAGAAGTGGTGCATATATCCAA                     | 44,31 |
| TCACATTAGCCCCCTAATCGACTAGCGCAGG                    | 46,15 |
| GTTTGAACACGCTTAGGGTCAGAAGCGTATCC                   | 46,31 |

|                                                   |       |
|---------------------------------------------------|-------|
| AATTCTCACTGCTCTAGGCGCATAGATGTCCG                  | 48,15 |
| AGCTGTTCCCTGTTTACGGTACACGTCGAGAACTAACGATTATTTCTGA | 48,31 |
| TCATCCGGTCCCCGTCTGGAGTTAGAAGGAGT                  | 50,15 |
| CATAGGTATTCATAACCTATCTTACGCTTACGTCCAACAGCTGTGAC   | 50,31 |
| AGATTGTACGCAGGGTGCTATGCTTTACTTCGTCTTCTCGCTCGACA   | 52,31 |
| GTTATTTCTGATAATCCTCGTGCTTTCTGGTCTGACGATCATCATGGT  | 60,31 |
| CGAACAGAGGTAGAGGTATTACTGCCTGTTTGAACCTTGATGAGCTTT  | 62,31 |

## S1.7 Z-56H×32B-tunnel crystal sequences

|                                                   |       |
|---------------------------------------------------|-------|
| CCAGGTTAAGTGGCTCAATCATACTCACGGTAACTGTTGTGCCTAT    | 1,23  |
| GTTTACTTAGGGATGGTACGAACTCAACGCAC                  | 1,39  |
| GCTCGGGTAGTCTCAAGAAGATAGAGAGCATA                  | 3,23  |
| AATTCGCTAAACCGGAAAAAGTATCCGCATCTC                 | 3,39  |
| ACTCAGTGATCGAGTATTTCATGTGCGCTTTTC                 | 5,23  |
| GAACGGTGACACACTGTGTTTCATTCAGAGTA                  | 5,39  |
| GCGGAAATATGGCCGCTTCGGTGCGCAGCGGGCCGCTGTAACGCTTA   | 7,39  |
| ATCAGCCCCGGGCTTTTGCTAATACGCTGAGCG                 | 9,23  |
| ATGCTGTTGTTGCGGGGTTTCTGAACCGGAACCCGGGCTAATGAAGCC  | 9,39  |
| GTGACCCAGAGACTGTCTGATGCACCGGGAG                   | 11,23 |
| CCAGCCACTTAGCTGTGTCAGTGTGATCGCGA                  | 11,39 |
| GTTCCCTCTAGCTAGGGTGTGCCCCAAAAGGGT                 | 13,23 |
| GGATATGGAGCTGGAACGGCTCTGATTTCTAG                  | 13,39 |
| TGACCTGGTATAATGGCCGAGCTACCTGACCTCAATCATACTGCCCAC  | 15,23 |
| GGAAAGGATTCATCCCCTTTAAGAATGATCGCACAGTCTTTGAGATGTT | 17,23 |
| GAACATCTTTTGGTTGGCGTAAAGATCTCGATTCTGGTGCCAAAAC    | 17,39 |
| GCCGACTCGTTCAAGCACTATTATCTGGCTATAAAAAGATGTCTGTGAC | 21,23 |
| CCCAAGCTTAGCATAAGCGGCTGGACGACCCCGCCGTGCGACGACTGA  | 23,39 |
| CCGTCGAGCCCTGCGCGACAAACGCATATCCTCGGCCCGCCAAATTA   | 25,23 |
| TAGTCGATTACGCTTCGCCTAAAGGTCCTTCCACGGTAATCGGGGGTG  | 25,39 |
| ACTCCGGCCCTCTGGTATATTAGCTTACCCACTCGCGTGGCACGCTCT  | 29,39 |
| ACGACTCGTCAACGAGGACTGTTCTACATAGTGACTTGGACGAGGTT   | 31,23 |
| TACTGGGCGCTATACAGGAACTCGAGGGGCTCCCTGTCTGTGCGAGC   | 33,23 |
| CCAGCGACCCTTCTGGAGAAAGATGCGGTGGCAGTAGTGTGATTAG    | 33,39 |
| CTTGGGGTGATATACCTCACTAAACTCCTTCTAATGTGACTAAGCGT   | 37,23 |
| TAACCTCAAAGGAAACAGCTATCCATATTCGATGTAAGCGGACATC    | 39,39 |
| TATGCGCCGATATCCGTTCAAACCTAGGGGGCTTCTGACCAAAGCTCA  | 41,23 |
| TGAGAAATTGTAACAGGAACAGCTTAGAGCAGTCAAGTTCGGATACGC  | 41,39 |
| TACCTATGGACGGGGATATGCGACACCATGATCCGGATGAGTTATGAA  | 45,39 |
| GATCGTCATTGGGATATACAATCTCGAAGTAAAGCATAGCACCCCTGCG | 47,23 |
| AAGATAGGGTACACAGCAGTAATACCTCTACCTTGTGGACGTAAGCGT  | 49,23 |
| GAAATAACGACCAGAAAGCACGAGGATTATCA                  | 49,39 |
| CGTGTACCTCGAAATAATCGTTAGTTTCTCGA                  | 51,23 |
| CTGTTCCGAAACAGGACGCGGTAGCCTCCCAC                  | 51,39 |
| TTAACCTATGCCTTGGTAACTGATTTTCTCCT                  | 53,23 |
| GGTCCGCTAGCTGATCTATGGTCCTTAATAT                   | 53,39 |
| AACCCTCGGAGGCAAGGGGAGAGGGTGAAACAGGCCACCTGGCTCGGG  | 55,39 |
| GAGTGCCCCCTCGGCAGCCGCTCGGTTATAC                   | 57,23 |
| TCGTCAAGCCTGCTTTCCATAGCTAACCCGATTGTGCATTCCACGTGA  | 57,39 |
| GTCGTACTTAAAGCAAACGTGGGAGTGCCCGA                  | 59,23 |
| GCGTCTGAGGTATGGTTTACCCACTATGTTGT                  | 59,39 |
| CTCAAGTGCTAACAGTACTAATTATCCATAAC                  | 61,23 |
| TGTGCACGTCAGGGATTCTCACCGGTGGCCGT                  | 61,39 |
| TGCTACATCAGTTTCTTGTACTCCTGGGGAAACTATACTTACGCACT   | 63,23 |
| GTATGATTATAGGACACAACAGTAAACCGTGACCAGGTCAAGGTCAGG  | 0,15  |
| CTATCTCGTGCCTTGAGTTCGTATATGCTCTGAGGGAACCTCCAGCT   | 2,15  |
| GACATGAAGAGATGCGGATACTTTGAAAAGGCGGGGTCACACAGCTAA  | 4,15  |
| ACAGGCGTACTCTGAATGAACACTAAGCGTTGGGCTGATCCCGCAAC   | 6,15  |
| TAGCCCCGGTTCCGGTATTTCCGCCCGCTGCGCACCGAAGCGGCCAT   | 8,15  |
| TCAGAAAACGGCTTCATCCAGCCGCTTATGCTA                 | 8,31  |
| GTATTAGCTCGCGATCCACCGTTCTACTCGATCACTGAGTAAGTGTGT  | 10,15 |
| ACACTGACCGCTCAGCGAGTCGGCATAGCCAG                  | 10,31 |
| GTGCTGGCAGTCTCT                                   | 11,32 |
| GCATCAGACTAGAAATAGCGAATTTTGAGACTACCCGAGCTCCGGTTT  | 12,15 |
| CAGAGCCGCTCCCGGT                                  | 12,31 |
| GGCATCAGTGGGACGAAAGTAAACGAGCCACTTAACCTGGCCATCCCT  | 14,15 |
| TATGATTGACCCTTTTATCCTTCCCAACCAA                   | 14,31 |
| TTCTTAAAAACATCTCTAGCTCCGCCATTATA                  | 16,15 |
| AAAGACTGTGCGATCACGAGTCGTCTATGTAG                  | 16,31 |
| CACCAGAATGCGAGATCCATATCCCCTAGCTA                  | 18,15 |
| CTTACGCAAGTTTGGCTAATATACCAAGGAG                   | 18,31 |
| CGCACGGCCTGACAGAAACAGCATAAAAAGCCC                 | 22,15 |
| CATCTTTTTCAGTCGTCTCGACGGGAAGCGTA                  | 22,31 |
| ATTACCGTGGAAAGGACAGCTTGGGGGGTTCGT                 | 24,15 |
| CTTAGGCCACCCCGGATAGCTGGTTTCCTT                    | 24,31 |



|                                                   |       |
|---------------------------------------------------|-------|
| CGTTTGTCTTAATTTGATAATAGTGCTTGAAC                  | 26,15 |
| GCGGGCCGAGGATATGCCCCAAGGAAGGAGT                   | 26,31 |
| CACGCGAGAACCTCGTAGATGTTCCGGGGATGA                 | 30,15 |
| CCAAGTCAAGACGTGCCCCAGTGACAGAAGTG                  | 30,31 |
| AGTTTCCTGCTCGACAAACAGTCTCGTTTCCA                  | 32,15 |
| GACAGGGAGCCCCCTCGTGACGATCTTACTTCG                 | 32,31 |
| AACTACTGCCACCGCAGCCGGAGTTGGGTAAG                  | 34,15 |
| TCTTTCTCCTAATCACGTGCGATATCCCCGTC                  | 34,31 |
| CTTACATCACGCTTAGATCGACTAGCGCAGGG                  | 38,15 |
| TCACATTAGATGTCCGGGGCGCATACTGTTTAC                 | 38,31 |
| GAAC TTGACTGCTCTATGGAGTTAGAATATGG                 | 40,15 |
| AGCTGTTCCGGTATCCCCCTCTCCCCTTGCCTC                 | 40,31 |
| GTTTGAAGT GAGCTTTTTAGTGAGGTATATCA                 | 42,15 |
| GGTCAGAAGCCCCCTATAGGTTAAATCAGCTA                  | 42,31 |
| TCATCCGGGCGCAGGGTGTGCGTGGGTATAGCC                 | 46,15 |
| GCTATGCTTTCATAACCCTATCTTTTCTGGTC                  | 46,31 |
| GTATTACTACGCTTACAGATTGTATATCCCAA                  | 48,15 |
| GTCCAACAAGGTAGAGATGTAGCATTCCCCAGGAGTGCAAAGAAACTG  | 48,31 |
| CTAACGATTGATAATCCATAGGTAATCATGGT                  | 50,15 |
| CTCGTGCTTCGAGAAAACACTTGAGATCCCTGACGTGCACAACTGTTAG | 50,31 |
| GGTACACGGCCTGTTT                                  | 51,16 |
| ATCAGTTAGTGGGAGG                                  | 52,15 |
| CTACCGCTAGGAGAAAAGTACGACACCATACCTCAGACGCTTGCTTTA  | 52,31 |
| AGGTGGCCATATTAAGAATTCTCAGGATATCG                  | 54,15 |
| GACCATAGCCCGAGCCGGGCACTCAAAGCAGGCTTGACGATGCCGAGG  | 54,31 |
| AGCTATGGTCACGTGGAATGCACAATCGGGTTCGAGGGTTTGTTCAC   | 56,31 |
| GTGGGTAAGTATAACCGAGGCGGCACAACATAGCGGAACCCCAAGGCA  | 58,31 |
| CGGTGAGATCGGGCACTCCACGTACGGCCACCGGAACAGTATTTTCCA  | 60,31 |
| AGTATAGTGTATGGATAATTAGTAGTGCGTAGTTATTTGCTGTGAC    | 62,31 |

## S1.8 Z-60H×64B-tunnel crystal sequences

|                                                    |       |
|----------------------------------------------------|-------|
| CCAGGTTAAGTGGCTCAATCATACTCACGGTAACTGTTGTGTCCTAT    | 1,23  |
| GTTTACTTAGGGATGGTACGAACTCAACGCAC                   | 1,39  |
| GCTCGGGTAGTCTCAAGAAGATAGAGAGCATAAATTCGCTAAACCGGA   | 1,55  |
| AAAGTATCCGCATCTCACTAGTGATCGAGTA                    | 1,71  |
| TTCATGTGCGCTTTTCGAACGGTGACACACTT                   | 3,23  |
| GTGTTCAATCAGAGTAGCGGAAATATGGCCGC                   | 3,39  |
| TTCGGTGCAGCGGGGCCCTGTAACGCTTA                      | 3,55  |
| ATCAGCCCGGGCTTTTGCTAATACGCTGAGCG                   | 3,71  |
| ATGCTGTTGTTGCGGGGTTTCTGAACCGGAAC                   | 5,23  |
| CCGGGCTAATGAAGCCGTGACCCAGAGACTG                    | 5,39  |
| TCTGATGCACCGGGAGCCAGCCACTTAGCTGT                   | 5,55  |
| GTCAGTGTGATCGCGAGTTCCTCTAGCTAGG                    | 5,71  |
| GTGATGCCAAAAGGGTGGATATGGAGCTGGAACGGCTCTGATTTCTAG   | 7,39  |
| TGACCTGGTATAATGGCGGAGCTACCTGACCTCAATCATACTGCCAC    | 7,71  |
| GGAAAGGATTATCCCTTTAAGAATGATCGCA                    | 9,23  |
| CAGTCTTTGAGATGTTGAACATCTTTTGGTTGGCGTAAAGATCTCGCA   | 9,39  |
| TTCTGGTGCCAAAACCTGCCACTCGTTCAAGC                   | 9,55  |
| ACTATTATCTGGCTATAAAGATGTCTGTGACCCAAAGCTTAGCATAA    | 9,71  |
| GCGGCTGGACGACCCCGCGTGCAGACTGA                      | 11,23 |
| CCGTCGAGCCCTGCGCGACAAAACGCATATCCT                  | 11,39 |
| CGGCCCGCCAAATTAATAGTCGATTACGCTTC                   | 11,55 |
| GCCTAAAGGTCCTTCCACGGTAATCGGGGGTG                   | 11,71 |
| ACTCCGGCCTCCTTGGTATATTAGCTTACCCA                   | 13,23 |
| CTCGCGTGGCAGCTTACGACTCGTCGAACGA                    | 13,39 |
| GGACTGTTCTACATAGTGACTTGGACGAGGTT                   | 13,55 |
| TCACTGGGCGCTATACAGGAAACTCGAGGGGC                   | 13,71 |
| TCCCTGTCTGTGAGCCAGCGACCACTTCTGGAGAAAGATGCGGTGG     | 15,23 |
| CAGTAGTTGTGATTAGCTTGGGGTGATATACCTCACTAAACTCCTTC    | 15,55 |
| TAATGTGACTAAGCGTTAACTCCAAAGGAAACCAGCTATCCCATATTC   | 17,23 |
| GATGTAAGCGGACATCTATGCGCCGATATCC                    | 17,39 |
| GTTCAAACTAGGGGGCTTCTGACCAAAGCTCATGAGAATTGTAACAG    | 17,55 |
| GAACAGCTTAGAGCAGTCAAGTTCGGATACGC                   | 17,71 |
| TACCTATGGACGGGGATATGCGACACCATGAT                   | 19,23 |
| CCGGATGAGTTATGAAGATCGTATTGGGATA                    | 19,39 |
| TACAATCTCGAAGTAAAGCATAGCACCCCTGCG                  | 19,55 |
| AAGATAGGGTACAGCAGTAATACCTTACCT                     | 19,71 |
| TGTTGGACGTAAGCGTGAAATAACGACCAGAA                   | 21,23 |
| AGCACGAGGATTATCACGTGTACCTCGAAATA                   | 21,39 |
| ATCGTTAGTTTCTCGACTGTTCCGAAACAGGC                   | 21,55 |
| AGCGGTAGCCTCCCACTTAACCTATGCCTTGG                   | 21,71 |
| TAACTGATTTCTCCTGGTCCGCTAGCTGATCTATGGTCTTAATAT      | 23,39 |
| AACCCTCGGAGGCAAGGGGAGAGGGTGAAACAGGCCACCTGGCTCGGG   | 23,71 |
| TTTTTTTTGAGTGCCC                                   | 24,8  |
| CCTCGGCATTTTTTTTTTTTTTGGCCGCTCGGTTATACTCGTCAAG     | 25,23 |
| CCTGCTTTCCATAGCTAACCCGATTGTGCATTCCACGTGATTTTTTTTT  | 25,39 |
| TTTTTTTTGTGCGTACTTAAAGCAATTTTTTTTT                 | 25,55 |
| ACGTGGGAGTGCCCGAGCGTCTGATTTTTTTTTTTTTTTTTTGGTATGGT | 29,39 |
| TTTTTTTTTTACCCACTATGTTGTTTTTTTTTT                  | 29,55 |
| CTCAAGTGTTTTTTTTT                                  | 31,23 |
| TTTTTTTTCTAACAGTACTAATTATCCATAACTGTGCACGTGAGGGAT   | 31,55 |
| TCTCACCGTTTTTTTTTTTTTTTTTGTGGCCGTTGCTACATCAGTTTCT  | 33,23 |
| TGCACTCCTGGGAAAACATACTTACGCACTGGTTTGGATTTTTTTTT    | 33,39 |
| TTTTTTTTGGGATTAGGCAATTGCTTTTTTTTTT                 | 33,55 |
| TTTTTTTTTAGGTTGC                                   | 34,8  |
| ATTGTAGGTTTTTTTTT                                  | 37,23 |
| TTTTTTTTCACAAATTTTGTATTCGATCACATACATGGGCAATAAAGCT  | 37,55 |
| GTAGCCTGAGGCGCGCAGCTGCACTTTTTTTTTTTTTTTTCGTGTCAC   | 39,39 |
| TTTTTTTTCTTGATATTGAGGGACTTTTTTTTT                  | 39,55 |
| ACCTCGTCATTGCGATAAACCATACTGAGGGC                   | 41,23 |
| AGTGGGCGAGATCGGCTAATCATTAGTGCTCCCTTAGTTAGTTCATAG   | 41,39 |
| TTCATTAGGGGCGGAAATGGGCTGGTGCCCA                    | 41,55 |
| CGTACAGTAACCAACCGGTGTACCTGTGGGTAGGGCCGAGCGCTGGGC   | 41,71 |
| TTACATGTGCAAGTGAAATATATGACTTGGTC                   | 43,23 |
| GACCAGATCTGTAGAAAACCAACATCCTC                      | 43,39 |
| CTTGACACCTTCAATTTTTAGTAAACACCCA                    | 43,55 |
| ACAGAGCTGAACTTCCCATGGTCTGTTCTACTG                  | 43,71 |

|                                                    |       |
|----------------------------------------------------|-------|
| TCGTATGATCATAGGATCAAACCTAAATACAGC                  | 45,23 |
| GTACCGCCAGTTCTTGTCCCTATTGGCGATCG                   | 45,39 |
| TGCATTCCAATGTTTGTATGGCCGCGTGGCTTA                  | 45,55 |
| TTAAGACGGCCGGTGTAAACCACATAAAGTCGT                  | 45,71 |
| CCGCCTCCGGTAGTCAACGCGGAACGTAATGGCAGAAAGTCTATACCC   | 47,23 |
| GACAAAAACAGATTTGTACCGGGTGAACAGCACGTGCGGCTTCTCCT    | 47,55 |
| GTATCGCCTTGTGTATTATACTCTTGCGGGGGGTTCGAGCGCTCCACT   | 49,23 |
| GTAGTGGCCGGCCATCGTGGACTAGAAAAGCGC                  | 49,39 |
| CGGCAATCTGAATATCGTACCTCCGATACGCGAACCAGAACCATTTA    | 49,55 |
| AGAGTAGGGGCAGTGCTCAGCCAAACAGTGGG                   | 49,71 |
| ACATCTCGGAAAGGTGTCCCAAGTGAAGTAA                    | 51,23 |
| AAAAGGAATTATGAGATCATGTGGGATCCTAA                   | 51,39 |
| AGTTTCTGGTAGACCTCGTAGGCTAGAGCGGT                   | 51,55 |
| GATATCCACGGTACATTCTGTTACTGCACGGA                   | 51,71 |
| ACGAGAGTGCTGGCATAAGCAAGAGAAAACCTA                  | 53,23 |
| ACTTGGGGACTAAGATCGTTGCGAATTTTCGC                   | 53,39 |
| GCGATTTCGCATGTAGCCGAACGAGATCGTCT                   | 53,55 |
| AGACGACGGATCTCTGCATGCCGGTAGCACC                    | 53,71 |
| GTCAAATATGCGTGCTTTAACGCTTTAGACCCAGCTTGACGCAAGAC    | 55,39 |
| GCTAATCACTGGGCAGGGTCTTAGGTTGCAGAAACCTACCCCTAAGC    | 55,71 |
| AGCGTAGTAAGGGTTACAAGTTCTTGCGGCGG                   | 57,23 |
| CTGTACGAATGAGTCCGGCTTGACATGACATTCTCCACCCGTCCAA     | 57,39 |
| CACCAGCAGGATGTCGAGCCACAACCTGACA                    | 57,55 |
| GTAGTACAGTATCTTTTTTCATGGCGGCGATGTCGCCGTTGCTCGCG    | 57,71 |
| TGCGTACGGCTTTTATATAGCGTAGACCGGAC                   | 59,23 |
| AACCCCGTAAATCGTAAGAGTCTGTTATGCCCC                  | 59,39 |
| CCGGTTCTGCTAGAGTGGGACTGGATCAGATG                   | 59,55 |
| TTCAAGTATTCGGTGACCTCCCGCATTACAA                    | 59,71 |
| CGCGTTACCAAGTAACGTATGTACGACGCGA                    | 61,23 |
| TGCGAGTGAACGGGTGGATGAATTTCTGTTCCG                  | 61,39 |
| GGCCAGGCGATCTAAGTCTGGCGCGTGAGGAC                   | 61,55 |
| ACGTAAGTTGAAGTAGGAAGCTTTTTCTAGCC                   | 61,71 |
| ATAGCATCGACACTACGACCTGCTTTTTCGACACGGACTGCATTCTGGA  | 63,23 |
| CAGTAACTGCATTAACACTAGTGTCTCCCAACATAAGTGACGTCCTCAGC | 63,55 |
| GTATGATTTCCGGTTTAGCGAATTTATGCTCTAACTACTGCAGAAAGTG  | 0,15  |
| CTATCTTATAGGACACAACAGTTAACCGTGAGACAGGGAGTATATCA    | 0,47  |
| CACCGTTCTACTCGATCACTGAGTTAAGCGTTAACAGTCCGTATAGCG   | 2,15  |
| ACAGGCGGGTGCCTGAGTTTCGTAAGTGTGTGCCGGAGTAGACGTGC    | 2,47  |
| TCAGAAACCGCTCAGCGTATTAGCACAGCTAAGCGGGCCGGGAAGGAC   | 4,15  |
| GTGGCTGGGCGGCCATATTTCCGCGTTCCGGTCCAGCCGCGCGCAGGG   | 4,47  |
| CAGAGCCGCTAGCTAGAGGGAACGTGGGACGCACCAGAAATAGCCAG    | 6,15  |
| TATGATTGCACTCTCTGGGGTACCTAGAAATATCCTTCCAACATCTC    | 6,47  |
| AGCTTGGGCTGACAGACCAGGTCAATCCAGCTCCATATCCACCCTTTT   | 8,15  |
| AGATGTTCTTATGCTAGCGGAACCAGGAGAAA                   | 8,31  |
| CTTTACGCCAACCAAGGCATCACAGGTGAGGTAGCTCCGCCATTATA    | 8,47  |
| CATCTTTTTGCGAGATCTCTCCCTTGCTCCGAGGGTTATCAGCTA      | 8,63  |
| TTCTTAAACACCCCGACACTGACCCCGCAACAACAGCATGGCTTCAT    | 10,15 |
| CGTTTGTCTGCGATCAGTCCAACATGATAATC                   | 10,31 |
| GAGTCGGCAGGATATGTAGCCCGCTCCCGGTGCATCAGATCGCGATC    | 10,47 |
| ATTACCGTGTGAAACCTAACGATGTGGGAGGCTACCGCTACGCTTAC    | 10,63 |
| CGCACGGCGCCCTCGGGGTGATGAAAAGGCGACATGAATACTCTGA     | 12,15 |
| CGAGTCTGTTAGTTCGTCATAGGTATTTCATAACTCATCCGGTTACTTCG | 12,31 |
| ATCGACTATCGTTCGAATGAACACCCCGTGCACCCGAAAAAAGCCC     | 12,47 |
| AGTTTCTGAAGCGTAAGATTGTAGCTGTGACCCTATCTTTCCCGCTC    | 12,63 |
| CTAATATAACCACCGCAGATACTTTGAGCCACTTAACCTGGCCATCCCT  | 14,15 |
| TTAGTGAGTGGTAAAGTCACATTAGATGTCCG                   | 14,31 |
| CCAAGTCAGAAGGAGTAAGTAAACTTGAGACTACCCGAGCGAGATGCG   | 14,47 |
| TCTTTCTCAACCTCGTGTGTTGAACCTGCTTAAGCTGTTACAGCTTAG   | 14,63 |
| TGGAGTTACTGTTTACGTGCTGGGCTCGACA                    | 16,15 |
| GATAGCTGGTTTCTTCACTTGAGGTTATGGA                    | 16,31 |
| AATTCTCATGAGCTTTGGTTCAGAAGAATATGGCCCCCAAGCTAATCAC  | 16,63 |
| GTCGCATAGCGTATCCCCAGTGACCAAGGAG                    | 18,15 |
| GGCGCATAATCATGGTTCAGACGCTCGGGCAC                   | 18,31 |
| GAACCTTGACGCAGGGTGTATGCTGGATATCGCACGCGAGCTATGTAG   | 18,63 |
| TGACGATCTTCTGGTCTTATTTCAAGTAGAGCTTTAGCGGGGTCGT     | 20,31 |
| GTATTACTGCCTGTTTCGGAACAGTATCCCAACTCGACGGTTAATTTG   | 20,63 |
| GACCATAGCCAAGGCAATAATAGTGGGGATGA                   | 22,15 |
| GGTACACGATATTAAGTGCCGAGGAGCTATGG                   | 22,31 |

|                                                   |       |
|---------------------------------------------------|-------|
| TAGGTTAACCCGAGCCAGGTGGCCTATTTTCGAAAAGACTGAGTTTTGG | 22,63 |
| ATCGGGTTGGGCACTCGTGCAGCTGCGCGCCT                  | 24,31 |
| TCACGTGGAATGCACAATCAGTTATGTTTCAC                  | 24,47 |
| GTATAACCGAGGCGCCCTACAATTATGTGAT                   | 26,31 |
| TTGCTTTACTTGACGACTCGTGCTTCGAGAAA                  | 26,47 |
| CGTGCACAACCATAACCCGGTGAGATTCCCCAG                 | 30,31 |
| ACAACATAATCCCTGACTTACATCGCCCCCTA                  | 30,47 |
| ATGTAGCAACGGCCACGGAGGGCGGGCTGTTCA                 | 32,31 |
| GCAATTGCAGAACTGTAATTAGTACTGTTAG                   | 32,47 |
| AGTATAGTGCAACCTATCATAACGACAAGAACT                 | 34,31 |
| TCCAAACCAGTGCGTATCCCACGTGTGGGTAA                  | 34,47 |
| TGCCCATGGTGACACGGACGAGGTGCCGATCT                  | 38,31 |
| GTCCCTCAAGCTTTATAAAGCAGGAGTACGAC                  | 38,47 |
| CTCGGCCCTACCCACAGGTACACCTATGAACCTAGGACCCTGCCAG    | 40,15 |
| AATGATTAGCCCAGCGGGCGTAAAAAGCACGCA                 | 40,31 |
| TAACTAAGGGAGCACTCAGGCTACATATCAAG                  | 40,47 |
| TATGGTTTCAGTAGAACGACCATGTGGGGCACCGAATCGCAGGAGATC  | 42,15 |
| TGGTGGTTGCCCTCAGACTCTCGTATCTTAGT                  | 42,31 |
| CAGCCCATGAGGATGTCGAATCAAAAATTGTG                  | 42,47 |
| CATATATTACGACTTTATGTGGTTTGGGTGTTTCAGAACTATGTACCG  | 44,15 |
| TACTAAAACGATCGCCAATAAGGAGACCAAGTCGAGATGTTCTCATAA  | 44,47 |
| TAGTTTGAGGGTATAGACTTTCTGTAAAGCCACGATTGCCGGCACTGCC | 46,15 |
| CCGCACGTGCTGTATTGGCGATACGATGGCCG                  | 46,31 |
| GCGGCCATAGGAGAAGGAGTGCAACTAATCCC                  | 46,47 |
| AGAGTATATAAATGGTTTCCGCGTTGACTACC                  | 48,15 |
| GCTCGACCCCCCGCAGATGCTATATGTTGGGAGCACGTAGTTAATGC   | 48,31 |
| GAGGTAGCAGTGGAGCCCCGGTACAAATCTGTTTTGTCCCATACG     | 48,47 |
| TCTGGTTCCGCTATCGAGTACTGTGTGCGAAAAGCAGGTCGTAGTGTC  | 48,63 |
| ACTTGGGACCCACTGTCTTAATCCTATGA                     | 50,15 |
| TAGTCCACTTACTTGCTAAGCGCGCACCCGTTCACTCGCACTTAGATC  | 50,31 |
| AGCTACGGCGCTTTCGGCGGTACCAAACATTGGAATGCAACACCGGC   | 50,47 |
| TTGGCTGAACCGCTCTGCCTGGCCCTACTTCAACTACGTTTACTTGG   | 50,63 |
| TCTTGCTTTCCGTGCAAGCTCTGTTCACTTGACATGTAATCTAGCAG   | 52,15 |
| CCACATGATAGGTTTCCGTACGCATACGATTTACGGGGTACTCTAGC   | 52,31 |
| CTCGTTCGTTAGGATCATCTGGTCATTGAAAGGTGTCAAGGGAAAGTTC | 52,47 |
| GTAACGAAGGACGATAGAACCAGTACCGAATACTTGAATAAAAAGC    | 52,63 |
| TCAAGCTGGGTGCTACACTGTACGATCCGAAT                  | 54,15 |
| TCGCAACGGTCTTGCAGTACGCTGGACTCATTCTGACAGCGACATCC   | 54,31 |
| GGTAGGTTGCGAAAATCGCCCACTTCCGCCCTAATGAAGTTGGTT     | 54,47 |
| CGGCATGCGCTTAGGGTGTGGTAAAAGATACTGTACTACTAACCTT    | 54,63 |
| TCAAGGCCCGCAGCAAACGGCGACATCGCCGTGATTAGCGGTCTAAA   | 56,31 |
| CCATGAAAATTGGACGGGTGGGAGAATGTCATGATTTGACTCTGCAAC  | 56,63 |
| ACGACTCTCCGCCGAGGAACCTGTTGTAATGCGTCGTCTATGCCAGC   | 58,31 |
| CGGGAGGTGTCAAGTTGTGGGCTGGGGCATACCCCAAGTGCTACATG   | 58,63 |
| AATTCATCGTCCGGTCTACGCTATGGCTAGAATGGATATCCACCTTTC  | 60,31 |
| AAAGCTTCCATCTGATCCAGTCCCGCAACGATTCCTTTAGGTCTAC    | 60,63 |
| CGTCACTTTCCGCTCGTACATACGTCAGAAATCCTACTCTATACAAA   | 62,31 |
| GCAGTCCGGTCTCACGCGCCAGAGCTGAGGAGCCACTACGATATTCA   | 62,63 |

## S1.9 Z-108H×32B-tunnel crystal sequences

|                                                    |        |
|----------------------------------------------------|--------|
| CCAGGTTAAGTGGCTCAATCATACTCACGGTAACTGTTGTGCCTAT     | 1,23   |
| GTTTACTTAGGGATGGTACGAACTCAACGCAC                   | 1,39   |
| GCTCGGGTAGTCTCAAGAAGATAGAGAGCATA                   | 3,23   |
| AATTCGCTAAACCGGAAAAGTATCCGCATCTC                   | 3,39   |
| ACTCAGTGATCGAGTATTCATGTCCCTTTTC                    | 5,23   |
| GAACGGTGACACACTTGTGTTCAATCAGAGTA                   | 5,39   |
| GCGGAAATATGGCCGCTTCGGTGCGCAGCGGG                   | 7,23   |
| CCGCCTGTAACGCTTAATCAGCCCGGGCTTTT                   | 7,39   |
| GCTAATACGCTGAGCGATGCTGTTGTTGCGGG                   | 9,23   |
| GTTTCTGAACCGGAACCCGGGCTAATGAAGCC                   | 9,39   |
| GTGACCCCAGAGACTGTTCTGATGCACCGGGAGCCAGCCACTTAGCTGT  | 11,39  |
| GTCAGTGTGATCGCGAGTTCCTCTAGCTAGG                    | 13,23  |
| GTGATGCCAAAAGGGTGGATATGGAGCTGGAACGGCTCTGATTTCTAG   | 13,39  |
| TGACCTGGTATAATGGCGGAGCTACCTGACCT                   | 15,23  |
| CAATCATACTGCCACGGAAGGATTCATCCCC                    | 15,39  |
| TTAAGAATGATCGCACAGTCTTTGAGATGTT                    | 17,23  |
| GAACATCTTTTGGTTGGCGTAAAGATCTCGCA                   | 17,39  |
| TTCTGGTGCCAAAAGTCCGACTCGTTCAAGC                    | 19,23  |
| ACTATTATCTGGCTATAAAAGATGCTGTCTCAG                  | 19,39  |
| CCCAAGCTTAGCATAAGCGGCTGGACGACCCC                   | 21,23  |
| GCCGTGCGACGACTGACCGTTCGAGCCCTGCGC                  | 21,39  |
| GACAAAACGCATATCCTCGGCCCGCCAAATTAATAGTCGATTACGCTTC  | 23,23  |
| GCCTAAAGGTCTTCCACGGTAATCGGGGGTACTCCGGCCTCCTTGG     | 25,23  |
| TATATTAGCTTACCCACTCGCGTGGCACGTCT                   | 25,39  |
| ACGACTCGTCAACGAGGACTGTTCTACATAG                    | 27,23  |
| TGACTTGGACGAGGTTTACTGGGCGTATAC                     | 27,39  |
| AGGAAACTCGAGGGGCTCCCTGTCTGTCTGAGC                  | 29,23  |
| CCAGCGACCACTTCTGGAGAAAGATGCGGTGG                   | 29,39  |
| CAGTAGTTGTGATTAGCTTGGGGGTGATATAC                   | 31,23  |
| CTCACTAAACTCCTTCTAATGTGACTAAGCGT                   | 31,39  |
| TAACCCAAAGGAAACCAGCTATCCATATTC                     | 33,23  |
| GATGTAAGCGGACATCTATGCGCCCGATATCC                   | 33,39  |
| GTTCAAAGTGGGGCTTCTGACCAAAGCTCATGAGAATTGTAACAG      | 35,39  |
| GAACAGCTTAGAGCAGTCAAGTTCGGATACGCTACCTATGGACGGGGA   | 37,23  |
| TATGCGACACCATGATCCGGATGAGTTATGAAGATCGTCATTGGGATA   | 37,39  |
| TACAATCTCGAAGTAAAGCATAGCACCCCTGCGAAGATAGGGTCAACAG  | 45,39  |
| AGTAATACCTCTACCTTGTGGACGTAAGCGTGAAATAACGACCAGAA    | 47,23  |
| AGCAGGAGATTATCACGTGTACCTCGAAATAATCGTTAGTTTCTCGA    | 49,23  |
| CTGTTCCGAAAACAGGACGCGGTAGCCTCCCACTTAACCTATGCCTTGG  | 49,39  |
| TAACGTATTTTCTCTGGTTCGGCTAGCTGATCTATGGTCTTAATAT     | 57,23  |
| AACCTCGGAGGCAAGGGGAGAGGGTGAAACAGGCCACCTGGCTCGGG    | 59,39  |
| GAGTGCCCCCTCGGCAGCCGCCTCGGTTATACTCGTCAAGCCTGCTTT   | 61,23  |
| CCATAGCTAACCCGATTGTGCATTCCACGTGAGTTCGTAATAAGCAA    | 61,39  |
| ACGTGGGAGTGCCCGAGCGTCTGAGGTATGGTTTACCCACTATGTTGT   | 69,39  |
| CTCAAGTGCTAACAGTACTAATATCCATAACTGTGCACGTCAGGGAT    | 71,23  |
| TCTACCCGGTGGCCGTTGCTACATCAGTTTCTTTCGACTCCTGGGGAA   | 73,23  |
| ACTATACTACGCACTGGTTTGGAGGGATTAGGCAATTGCTAGGTTGC    | 73,39  |
| ATTGTAGGCACAATTTTGTATTCGATCACATACATGGGCAATAAAGCT   | 81,23  |
| GTAGCCTGAGGCGCGCAGCTGCACCGTGCACCTTGATATTGAGGGAC    | 83,39  |
| ACCTCGTCAATCGGATAAACCATACTGAGGGCAGTGGGCGAGATCGGC   | 85,23  |
| TAATCATTAGTGCTCCCTTAGTTAGTTTCATAGTTTCATTAGGGGCGGAA | 85,39  |
| ATGGGCTGGTGCCCCACGTACAGTAACCAACCGGTGTACCTGTGGGTA   | 93,39  |
| GGGCGAGCGCTGGGCTTACATGTGCAAGTGAAATATATGACTTGGTC    | 95,23  |
| GACCAGATCTGTAGAAACCACCAACATCCTCCTTGACACCTTCAAT     | 97,23  |
| TTTTAGTAAACACCAACAGAGCTGAACTTCCCATGGTCGTTCTACTG    | 97,39  |
| TCGTATGATCATAGGATCAAACATAAATACAGCGTACCGCCAGTTCTTG  | 105,23 |
| TCCTTATTGGCGATCGTGCATTCCAATGTTTGTGGCCGCGTGGCTTA    | 107,39 |
| TTAAGACGGCCGGTGAACCACATAAAGTCGT                    | 109,23 |
| CCGCCTCCGGTAGTCAACGCGGAACGTAATGGCAGAAAGTCTATACCC   | 109,39 |
| GACAAAAACAGATTTGTACCGGGTGAACAGC                    | 111,23 |
| ACGTGCGGCTTCTCCTGTATCGCCTTGTGTAT                   | 111,39 |
| TATACTTTGCGGGGGGGTTCGAGCGCTCCACT                   | 113,23 |
| GTAGTGGCCGGCCATCGTGGACTAGAAAGCGC                   | 113,39 |
| CGGCAATCTGAATATCGTACCTCCGATACGC                    | 115,23 |
| GAACCAGAACCATTTAAGAGTAGGGGCAGTGC                   | 115,39 |
| TCAGCCAAACAGTGGGACATCTCGGAAAGGTG                   | 117,23 |

|                                                   |        |
|---------------------------------------------------|--------|
| TCCCAAGTGAAGTAAAAAAGGAATTATGAGA                   | 117,39 |
| TCATGTGGGATCCTAAAGTTCTGGTAGACCTCGTAGGCTAGAGCGGT   | 119,23 |
| GATATCCACGGTACATTCGTTTACTGCACGGAACGAGAGTGCTGGCAT  | 121,23 |
| AAGCAAGAGAAACCTAACTTGGGGACTAAGAT                  | 121,39 |
| CGTTGCGAATTTTCGCGCGATTTCGCATGTAGC                 | 123,23 |
| CGAACGAGATCGTCTAGACGACGGATCTCCT                   | 123,39 |
| GCATGCCGGTAGCACCGTCAAATATGCGTGCT                  | 125,23 |
| TTTAAACGCTTTAGACCCAGCTTGACGCAAGAC                 | 125,39 |
| GCTAATCACTGGGCAGGGTCTAGGTTGCAGA                   | 127,23 |
| AACCTACCCCTAAGCAGCGTAGTAAAGGGTTA                  | 127,39 |
| CAAGTTCCTGCGGCGGCTGTACGAATGAGTCC                  | 129,23 |
| GGCCTTGACATGACATTCTCCACCCGTCCA                    | 129,39 |
| CACCAGCAGGATGTCGAGCCACAACCTGACAGTAGTACAGTATCTTT   | 131,39 |
| TTTCATGGCGCGATGTCGCGCTTTGCTCGCG                   | 133,23 |
| TGCGTACGGCTTTTATATAGCGTAGACCGGACAACCCCGTAAATCGTA  | 133,39 |
| AGAGTCGTTATGCCCCCGTCTGCTAGAGT                     | 135,23 |
| GGGACTGGATCAGATGTTCAAGTATTCGGTGA                  | 135,39 |
| CCTCCCCGATTACAACGCGCTTACCAAGTAA                   | 137,23 |
| CGTATGTACGACGCGATGCGAGTGAACGGGTG                  | 137,39 |
| GATGAATTTTCGTTTCGGGGCCAGGCGATCTAAG                | 139,23 |
| TCTGGCGCGTGAGGACACGTAAGTTGAAGTAG                  | 139,39 |
| GAAGCTTTTTCTAGCCATAGCATCGACACTAC                  | 141,23 |
| GACCTGCTTTTCGACACGGACTGCATTCTGGA                  | 141,39 |
| CAGTAACTGCATTAACCTACGTGCTCCCAACATAAGTGACGTCCTCAGC | 143,23 |
| GTATGATTATAGGACACAACAGTTAACCGTGACGTTTGTCTTAATTTG  | 0,15   |
| CTATCTTCGTGCGTTGAGTTCGTATATGCTCTAGCTTGGGTCAGTCGT  | 2,15   |
| GACATGAAGAGATGCGGATACTTTGAAAAGGCCACCAGAAATAGCCAG  | 4,15   |
| GCACCGAATACTCTGAATGAACACCCCGCTGCTTCTTAAACAACAAA   | 6,15   |
| AACAGCATAAAAGCCCGGGCTGATCCCGCAACCCAGGTCAGTGGGACG  | 8,15   |
| GTGGCTGGGGCTTCATTAGCCCGGACAGCTAAACACTGACACCCTTTT  | 10,15  |
| CAGAGCCGTTCCAGTGGGGTCACCTCCCGTGCATCAGACAGTCTCT    | 12,15  |
| CCATATCCCTAGAAATGGTCAGAAGCCCCCTA                  | 12,31  |
| GAGGGAACGGGGATGATCAGAAACCGCTCAGCGTATTAGCGTTCGGT   | 14,15  |
| ATCCTTCCCTAGCTATGGAGTTAGATGTCCG                   | 14,31  |
| TAGTCCGTGCGAGATACAGGCGGGCGCCATATTTCCGCTAAGCGTT    | 16,15  |
| CTTTACGCAAGTACAGGAACCTGGAAGGAGTTAGTGAGCTAATCAC    | 16,31  |
| AAAGACTGCTGACAGACACCGTTCTACTCGATCACTGAGTAAAGTGTGT | 18,15  |
| CATCTTTTAAACATCTCAGTTTCCCTCAGAAGTGGTCGCTGGGCCCTCG | 18,31  |
| GAGTCGGCGCGCAGGGAGCGAATTTGAGACTACCCGAGCTCCGGTTT   | 20,15  |
| CTCGACGGGCTTGAACCGAGTCGTAACCTCGTCCAAGTCATCGTTTCA  | 20,31  |
| CCAGCCGCGAAGCGTAAAGTAAACGAGCCACTTAACTGGCCATCCCT   | 22,15  |
| ATCGACTAGGGGTCGTCTTTAGGCTGGGTAAG                  | 22,31  |
| ATTACCGTCCAAGGAGGCGGGCCGAGGATATG                  | 24,15  |
| GCCGGAGTCAACCCCGGTATTACTACGCTTAC                  | 24,31  |
| AACAGTCCAGACGTGCCGACGGCTTATGCTA                   | 26,15  |
| CACGCGAGCTATGTAGGCTATGCTTTACTTCG                  | 26,31  |
| CCCAGTGAGCTCGACAGACAGGGAGTATAGCGATAATAGTAGTTTGG   | 28,31  |
| TCTTTCTCGTATATACCCCCAAGCCACCGCAAGATGTTCTGCGATCA   | 30,31  |
| TCACATTAGAAATATGGGATAGCTGACGCTTAGTATGATTGCCATTATA | 32,31  |
| AATTCTCAGGATATCGGGCATCACTCGCGATC                  | 34,15  |
| GGCGATACTGTTTACAGCTGTTTATCATGTT                   | 34,31  |
| TGACGATCTCATAACGTTTGAACGAGCTTT                    | 36,15  |
| TCATCCGGTATCCCAACCTCTCCCCTGCCTC                   | 36,31  |
| GAACCTGATCCCGTCTTACATCGTTTCCTT                    | 38,15  |
| CATAGGTAGCGTATCCATCAGTTAATCAGCTA                  | 38,31  |
| CCTATCTTTTCTGGTCTTAATATAGGAAGGAC                  | 46,15  |
| GTTATTTTCGCTGTGACCTCGTGCTGCCTGTTT                 | 46,31  |
| GGTACACGTCGAGAAAGTCCAACAAGGTAGAG                  | 48,15  |
| CTAACGATTATTTGACACTTGAGGTTATGGA                   | 48,31  |
| TAGGTTAAGTGGGAGGAGATTGTACGAGGGT                   | 50,15  |
| CTACCGCTCCAAGGCATCAGACGCTCGGGCAC                  | 50,31  |
| AGGTGGCCATATTAAGGTGCGATACTGCTCTA                  | 58,15  |
| GACCATAGCCGAGCCGGGCACTCATCGGGT                    | 58,31  |
| AGTACGACTACGTGGCGAGGGTTTGTTCAC                    | 60,15  |
| AATGCACATTGCTTTAGTGCAGCTGCGCGCCT                  | 60,31  |
| GAGGCGCAAAGCAGGGCGGAACCAAGGAGAAA                  | 62,15  |
| CTTGACGAGTATAACCCCTACAATTATGTGAT                  | 62,31  |
| GTGGTAAATCCCTGACGGAACAGTGATAATC                   | 70,15  |

|                                                    |        |
|----------------------------------------------------|--------|
| CGTGACAACAACATACGGTGAGAAGTGCCTA                    | 70,31  |
| ATGTAGCATTCCCCAGTAATTAGTACTGTTAG                   | 72,15  |
| GAGTGCAAAGAAACTGCTCGGCCCTCACTTGC                   | 72,31  |
| GCAATTGCCTAATCCCTCCACGTACCATAACC                   | 74,15  |
| TCCAAACCGCAACCTAACTGTACGTGGGGCAC                   | 74,31  |
| ATATCAAGAGCTTTATAGCTATGGTGCCGAGG                   | 82,15  |
| TGCCCATGGTCCCTCAGACGAGGTGGAGCACT                   | 82,31  |
| CTAATGAACTATGAACCAGGCTACGTGACACG                   | 84,15  |
| TAATAAGTTCCGCCCGAATGCACGATCGCC                     | 84,31  |
| TATGGTTTGCCGATCTCGAATCAAAAATTGTG                   | 86,15  |
| CGCCCACTGCCCTCAGTCATACGAGCTGTATT                   | 86,31  |
| GGTACACCGACCAAGTAGTATAGTACGGCCAC                   | 94,15  |
| CATATATTTACCCACAATCTGGTCTGGGTGTT                   | 94,31  |
| TGGTGGTTATTGAAAGACATGTAAGCCCAGCG                   | 96,15  |
| GTGTCAAGGAGGATGTCCACATGAAGGTCTAC                   | 96,31  |
| CGACCATGGGAAGTCCAGCCCATGGTTGGTT                    | 98,15  |
| AGCTCTGTCAGTAGAATTGGCTGATTACTTGC                   | 98,31  |
| GCGGCCATCAAGAACTAATGATTAATCCGAAT                   | 106,15 |
| GGCGGTACTAAGCCACCGTCTTAATGACTACC                   | 106,31 |
| ACTTTCTGCCATTACGAATAAGGACAAAACATT                  | 108,15 |
| TTCCGCGTGGGTATAGTGTGGGCTCGACATCC                   | 108,31 |
| ATGTGGTTATACACAATAGTTTGATCCTATGA                   | 110,15 |
| GGCGATACACGACTTTGGAAGTTGATGTCATG                   | 110,31 |
| CCCCGGTAGCGCTTCTAGTCCACGCTGTTTCATGATTAGCGCTTAGGG   | 112,15 |
| GCTCGACCGCACTGCCCTACTCTAGTGGAGCCGGCATGCGGTCTAAA    | 114,15 |
| GAGGTAGCTCTCATAATTCCTTTTTCGTATCGTCGCAACGAGGACGAT   | 116,15 |
| CGAGATGTACCGCTCTTACTAAAATCTAGCAG                   | 118,15 |
| AGCCTACGCACCTTTCTGGATATCTAGGTTTC                   | 118,31 |
| GTAAACGAATGCCAGCCAGAAACTTTAGGATC                   | 120,15 |
| ACTCTCGTTCCGTGCAAGTTACTGATGTTGGGAGCACGTAGTTAATGC   | 120,31 |
| CGAATCGCATCTTAGTACTTGGGACCCACTGT                   | 122,15 |
| CCCCAAGTGCTACATGAAAGCTTCTGTGCGAAAAGCAGGTCGGCTAGAA  | 122,31 |
| TATTTGACAGGAGATCTCTGGTTCGATATTCAGATTGCCGTAATGGT    | 124,15 |
| CGTCGTCTAGCACGCAAATTCATCGTCTCACGCGCCAGACCGAACGA    | 124,31 |
| CTAGGACCGTCTTGCGGCCACTACCCCCGCAAGAGTATAGATGGCCG    | 126,15 |
| TCAAGCTGTCTGCAACCGGGGAGGTCGCGTCGTACATACGTTGTAATG   | 126,31 |
| TCGTACAGTAAACCTTCCGCACGTCAAATCTGTTTTTGTACAGGAGAAG  | 128,15 |
| ACTACGCTGGACTCATACGACTCTCATCTGATCCAGTCCCGGGGCATA   | 128,31 |
| TGTACTACTTGGACGGGGAGGCGGACACCGGC                   | 130,15 |
| GTGGGAGAAAAAGATACCCATGAAAATAAAAAGCCGTACGCACATCGCCG | 130,31 |
| TACGCTATTACGATTTACGGGGTTGTCCGGTCTGCTGGTGTGTCAAGT   | 132,31 |
| TACTTGAACGCGAGCAAACGGCGATCACCGAATCAAGGCCCCGCCGCA   | 134,31 |
| CACTCGCAACTTAGCAGAACCGGCACCCGTTGGTAGGTTCTGCCAG     | 136,31 |
| ACTTACGTTTACTTGGTAAGCGCGCTACTTCAGCGTTAAAGGTGCTAC   | 138,31 |
| GCAGTCCGCTTAGATCGCCTGGCCTCCAGAATCTCGTTCCGGGAAAAAT  | 140,31 |
| CGTCACTTGTAGTGTGATGCTATGCTGAGGATCTTGCTTATGTACCG    | 142,31 |

## S2.1 X-6H×6H×64B-cuboid crystal sequences

|                                   |       |
|-----------------------------------|-------|
| CCAGGTTAAGTGGCTCAATCATACTCACGGTT  | 1,31  |
| AACTGTTGTGCTATGTTACTTAGGGATGG     | 1,47  |
| TACGAACTCAACGCACGCTCGGGTAGTCTCAA  | 1,63  |
| GAAGATAGAGAGCATAAATTCGCTAAACCGGA  | 1,79  |
| AAAGTATCCGCATCTCACTCAGTGATCGAGTA  | 3,31  |
| TTCATGTCGCCTTTTCGAACGGTGACACACTT  | 3,47  |
| GTGTTCAITCAGAGTAGCGGAAAATATGGCCGC | 3,63  |
| TTCGGTGCGCAGCGGGCCGCTGTAACGCTTA   | 3,79  |
| ATCAGCCCCGGCTTTTGCTAATACGCTGAGCG  | 5,31  |
| ATGCTGTTGTTGCGGGGTTTCTGAACCGGAAC  | 5,47  |
| CCGGGCTAATGAAGCCGTGACCCAGAGACTG   | 5,63  |
| TCTGATGCACCGGGAGCCAGCCACTTAGCTGT  | 5,79  |
| GTCAGTGTGATCGCGAGTTCCTCTAGCTAGG   | 7,31  |
| GTGATGCCAAAAGGGTGGATATGGAGCTGGAA  | 7,47  |
| CGGCTCTGATTTCTAGTGACCTGGTATAATGG  | 7,63  |
| CGGAGCTACCTGACCTCAATCATACTGCCAC   | 7,79  |
| GGAAGGATTATCCCTTTAAGAATGATCGCA    | 9,31  |
| CAGTCTTTGAGATGTTGAACATCTTTGGTTG   | 9,47  |
| GCGTAAAGATCTCGATTCTGGTGCCAAAAC    | 9,63  |
| GCCGACTCGTTCAAGCACTATTATCTGGCTAT  | 9,79  |
| AAAAGATGTCTGTCAGCCCAAGCTTAGCATAA  | 11,31 |
| GCGGCTGGACGACCCCGCCGTGCGACGACTGA  | 11,47 |
| CCGTGAGCCCTGCGCGACAAACGCATATCCT   | 11,63 |
| CGGCCCGCCAAATTAATAGTCGATTACGCTTC  | 11,79 |
| GCCTAAAGGTCTTCACGGTAATCGGGGGTG    | 13,31 |
| ACTCCGGCTCCTTGGTATATTAGCTTACCCA   | 13,47 |
| CTCGCGTGGCACGCTACGACTCGTCGAACGA   | 13,63 |
| GGACTGTTCTACATAGTGACTTGGACGAGGTT  | 13,79 |
| TCACTGGGCGCTATACAGGAAACTCGAGGGGC  | 15,31 |
| TCCCTGTCTGTCGAGCCAGCGACCACTTCTG   | 15,47 |
| GAGAAAGATGCGGTGGCAGTAGTTGTGATTAG  | 15,63 |
| CTTGGGGGTGATATACCTCACTAAACTCCTTC  | 15,79 |
| TAATGTGACTAAGCGTAACTCCAAAGGAAAC   | 17,31 |
| CAGCTATCCATATTCGATGTAAGCGGACATC   | 17,47 |
| TATGCGCCCGATATCCGTTCAAACCTAGGGGGC | 17,63 |
| TTCTGACCAAAGCTCATGAGAATTGTAAACAG  | 17,79 |
| GAACAGCTTAGAGCAGTCAAGTTCGGATACGC  | 19,31 |
| TACCTATGGACGGGATATGCGACACCATGAT   | 19,47 |
| CCGGATGAGTTATGAAGATCGTCATTGGGATA  | 19,63 |
| TACAATCTCGAAGTAAAGCATAGCACCCCTGCG | 19,79 |
| AAGATAGGGTACACAGCAGTAATACCTTACCT  | 21,31 |
| TGTTGGACGTAAGCGTGAAATAACGACCAGAA  | 21,47 |
| AGCACGAGGATTATCACGTGTACCTCGAAATA  | 21,63 |
| ATCGTTAGTTTCTCGACTGTTCCGAAACAGGC  | 21,79 |
| AGCGGTAGCCTCCCACTTAACCTATGCCTTGG  | 23,31 |
| TAACTGATTTTCTCCTGGTCCGCTAGCTGAT   | 23,47 |
| CTATGGTCTTAATATAACCCTCGGAGGCAAG   | 23,63 |
| GGGAGAGGGTGAAACAGGCCACCTGGCTCGGG  | 23,79 |
| GAGTGCCCCCTCGGCAGCCGCCTCGGTTATAC  | 25,31 |
| TCGTCAAGCCTGCTTCCATAGCTAACCCGAT   | 25,47 |
| TGTGCATTCCACGTGAGTCGTACTTAAAGCAA  | 25,63 |
| ACGTGGGAGTGCCCCGAGCGTCTGAGGTATGGT | 25,79 |
| TTACCCACTATGTTGTCTCAAGTGCTAACAGT  | 27,31 |
| ACTAATTATCCATAACTGTGCACGTACAGGGAT | 27,47 |
| TCTACCCGGTGGCCGTTGCTACATCAGTTTCT  | 27,63 |
| TTGCACTCCTGGGGAAACTACTTACGCACT    | 27,79 |
| GGTTTGGAGGGATTAGGCAATTGCTAGGTTGC  | 29,31 |
| ATTGTAGGCACAATTTTGATTGATCACATA    | 29,47 |
| CATGGGCAATAAAGCTGTAGCCTGAGGCGCGC  | 29,63 |
| AGCTGCACCGTGTACCTTGATATTGAGGGAC   | 29,79 |
| ACCTCGTCATTCGGATAAACCATACTGAGGGC  | 31,31 |
| AGTGGGCGAGATCGGCTAATCATTAGTGCTCC  | 31,47 |
| CTTAGTTAGTTCATAGTTCATTAGGGGCGGAA  | 31,63 |
| ATGGGCTGGTGCCCCACGTACAGTAACCAACC  | 31,79 |
| GGTGACTGTGGGTAGGGCCGAGCGCTGGGC    | 33,31 |
| TTACATGTGCAAGTGAATATATGACTTGCTC   | 33,47 |



|                                                   |       |
|---------------------------------------------------|-------|
| GACCAGATCTGCTAGAAACCACCAACATCCTC                  | 33,63 |
| CTTGACACCTTCAATTTTAGTAAACACCCA                    | 33,79 |
| ACAGAGCTGAACTTCCCATGGTCTTCTACTG                   | 35,31 |
| TCGTATGATCATAGGATCAAATAAATACAGC                   | 35,47 |
| GTACCGCCAGTCTTGTCCCTATTGGCGATCG                   | 35,63 |
| TGCATTCCAATGTTTGTATGGCCGCTGGCTTA                  | 35,79 |
| GTAIGATTTTTTTTT                                   | 0,23  |
| ACCCGAGCGTTCGGTTTCAGAAACAACCGTGACATCTTTTGGGGTTCGT | 0,55  |
| TTTTTTTACAGCTAAGTGGCTGGTTGAGACTCTCGACGGTTAATTTG   | 0,87  |
| CACTGAGTTTTTTTT                                   | 2,23  |
| ATTTCCGCCATCCCCTAAGTAAACTACTCGATATCCTTCCAACATCTC  | 2,55  |
| TTTTTTTTCGGTTTAGCGAATTGCGGCCATCTTACGCGCTTGAAC     | 2,87  |
| GTATTAGCTTTTTTTT                                  | 4,23  |
| GGGTCACAAGTGTGTACCGTTCGGTCTCAGCACACTGACACCCTTT    | 4,55  |
| TTTTTTTAAAGCGTTACAGGCGGCAGTCTCTCAGAGCCGAGGTCAGG   | 4,87  |
| AGCTTGGGTTTTTTTTTTTTTTTAAAAGCCCGGCTGATCCCACAAC    | 6,23  |
| CCATATCCTTATGCTATCACATAGAATATGG                   | 6,39  |
| CGTTTGTCTTCCAGCTAACAGCATGGCTTCATTAGCCCGGCTCCCGGT  | 6,55  |
| TATGATTGAGGATATGGCGCATATGAGCTTT                   | 6,71  |
| TTTTTTTGTGGGACGGCATCAGATTTTTTTT                   | 6,87  |
| GAGGAACTTTTTTTTTTTTTTTGAGATGCGGATACTTTGAAAAGGC    | 8,23  |
| AGATGTTCCCTAGCTACCCAGTGTGAGCTCGACA                | 8,39  |
| CCAGGTCACAACCAAGACATGAATACTCTGAATGAACACCCCGCTGC   | 8,55  |
| ATAATAGTCCATTATATCTTCTCGTATATCA                   | 8,71  |
| TTTTTTTATAGCCAGGCACCGAATTTTTTTT                   | 8,87  |
| TTCTTAAATTTTTTTTTTTTTTTGAGCCACTTAACTGGATAGGACA    | 10,23 |
| CGCACGGCTGCGATCACTTTAGGCCCAAGGAG                  | 10,39 |
| CACCAGAATCAGTCGTCAACAGTTGTGCGTTGAGTTCGTATATGCTCT  | 10,55 |
| ATCGACTAAGTTTGGCACGCGAGCTATGTAG                   | 10,71 |
| TTTTTTTGAAGCGTACTATCTTCTTTTTTTT                   | 10,87 |
| ATTACCGTTTTTTTTTTTTTTTTCTGACAGA                   | 12,23 |
| CTTACATCCACCCCGCTACCGCTAGGAGAAA                   | 12,39 |
| CGAGTCGTGATGTCGCCAGCCGCGCAGGG                     | 12,55 |
| AATCTCATCGTTCGAGACCATAGTGTTCAC                    | 12,71 |
| TTTTTTTCTGTTACGCGGGCCGTTTTTTTT                    | 12,87 |
| AGTTTCCTTTTTTTTTTTTTTTTGGGGATGA                   | 14,23 |
| CTAATATAGCCCTCGCCTATCTTACGCTTAC                   | 14,39 |
| AACTACTGTGGGTAAGAAAGACTGTGCGAGAT                  | 14,55 |
| CCAAGTCACTAATCACCTCGTCTCGAGAAA                    | 14,71 |
| TTTTTTTAACTCGTGAGTCGGCTTTTTTTT                    | 14,87 |
| TGGAGTTATTTTTTTTTTTTTTTTCGCGATC                   | 16,23 |
| GTCGCTGGGTTTCTTAGCTGTTCTCCCGTC                    | 16,39 |
| GTTTGAACCAGAAGTGGGCATCACCTAGAAAT                  | 16,55 |
| TTAGTGAGGCCCTATCATCCGGTACTTCG                     | 16,71 |
| TTTTTTTGAAGGAGTTAGTCCGTTTTTTTT                    | 16,87 |
| TAGGTTAATTTTTTTTTTTTTTTTACGCTTAG                  | 18,23 |
| GTCGCATACCAAGGCATCAAACCAAATGTG                    | 18,39 |
| CGAGGGTATCATGGTGATAGCTGGGATATCG                   | 18,55 |
| GCTATGCTCTGCCTCTGCCATGGTGACACG                    | 18,71 |
| TTTTTTTTCGAGGGTGGTCAGAATTTTTTTT                   | 18,87 |
| GAACCTGATTTTTTTTTTTTTTTTGTATAGCG                  | 20,23 |
| GTTATTTTCGCGTATCCGTGGGTAAGTTATGGA                 | 20,39 |
| TGACGATCTTCTGGTCGACAGGGACCACCGCA                  | 20,55 |
| CGGAACAGTATCCAACGGTGAGATCCCCAG                    | 20,71 |
| TTTTTTTGCCTGTTTCCCCAAGTTTTTTTT                    | 20,87 |
| GTATTACTTTTTTTTTTTTTTTTGGAAAGGAC                  | 22,23 |
| GCGGAACCAGGTAGAGGGGCACTCAAAGCAGG                  | 22,39 |
| GGTACACGATCAGCTAGCCGGAGTAGACGTGC                  | 22,55 |
| AGGTGGCCTATTCGAAATGCACATCGGGCAC                   | 22,71 |
| TTTTTTTCCCAGCCAACAGTCTTTTTTTTT                    | 22,87 |
| GAGGCGCTTTTTTTTTTTTTTTTGTGGGAGG                   | 24,23 |
| CGAATCAAGTATAACCAGCTCTGTTCTATGATCATACGACAAGAAT    | 24,39 |
| AGTACGACTATGTGATATCAGTTAATATTAAG                  | 24,55 |
| ATATCAAGTTGCTTAGGCGGTACCAAACATTGGAATGCATTTTTTTT   | 24,71 |
| TTTTTTTGTCCCTCACCTCTCCCTTTTTTTT                   | 24,87 |
| CACTTGAGTTTTTTTTTTTTTTTGTGTGAC                    | 26,23 |
| AGCTATGGACTGTTAGGGTACACCTCACTTGACATGTAATCTAGCAG   | 26,39 |
| ATGTAGCAATCGGTTGTCCAACATGATAATC                   | 26,55 |

|                                                  |       |
|--------------------------------------------------|-------|
| TCAGACGCAGAAACTGATCTGGTCATTGAAAGGTGCAAGTTTTTTTT  | 26,71 |
| TTTTTTTTACCATACCCTAACGATTTTTTTTT                 | 26,87 |
| GCAATTGCTTTTTTTTTTTTTCTGCTCTA                    | 28,23 |
| CGTGACAGCAACCTAGACGAGGTGCCGATCTCGCCACTCTATGAAC   | 28,39 |
| CAGGCTACATCCCTGACATAGGTATTCATAAC                 | 28,55 |
| AGTATAGTGC GCGCCTTAACTAAGTGGGGCACCAGCCATTTTTTTTT | 28,71 |
| TTTTTTTTAGTGC GTAAGATTGATTTTTTTTT                | 28,87 |
| AATGATTACAGTAGAACGACCATGTTTTTTTTTTTTTTCTAATCCC   | 30,39 |
| ACTGTACGCGATCGCCAATAAGGAGGAGCACTCCTACAATAGCTTTAT | 30,71 |
| TTTTTTTTGGTTGGTTGTGCAGCTTTTTTTTT                 | 30,87 |
| TTTTTTTTATCCGAAT                                 | 31,8  |
| CATATATTGCCCTCAGTATGGTTTTTTTTTTTTTTTTTACAACATA   | 32,39 |
| TACTAAAATTCCGCCCTAATGAAGACCAAGTTAATTAGTACGGCCAC  | 32,71 |
| TTTTTTTTGGGTGTTGAGTGCAATTTTTTTTT                 | 32,87 |
| TTTTTTTTTACCCACA                                 | 33,8  |
| TAGTTTGAGCCAGCGCTCGGCCCTTTTTTTTTTTTTTTTGCCGAGG   | 34,39 |
| GCGCCATGAGGATGTTGGTGGTTGCTGTATTCTTGACGATCACGTGG  | 34,71 |
| TTTTTTTTAAGCCACTCCACGTTTTTTTTTT                  | 34,87 |
| TTTTTTTTGGAAGTTC                                 | 35,8  |

## S2.2 X-32H×64B-pore crystal sequences

|                                                   |       |
|---------------------------------------------------|-------|
| CCAGGTTAAGTGGCTCAATCATACTCACGGTT                  | 1,31  |
| AACTGTTGTGTCCTATGTTTACTTAGGGATGG                  | 1,47  |
| TACGAACTCAACGCACGCTCGGGTAGTCTCAA                  | 1,63  |
| GAAGATAGAGAGCATAAATTCGCTAAACCGGA                  | 1,79  |
| AAAGTATCCGCATCTCACTCAGTGATCGAGTA                  | 3,31  |
| TTCATGTCGCCTTTTCGAACGGTGACACACTT                  | 3,47  |
| GTGTTCAITCAGAGTAGCGGAAATATGGCCGC                  | 3,63  |
| TTCGGTGCGCAGCGGGCCGCTGTAACGCTTA                   | 3,79  |
| ATCAGCCCCGGCTTTTGCTAATACGCTGAGCG                  | 5,31  |
| ATGCTGTTGTTGCGGGGTTTCTGAACCGGAAC                  | 5,47  |
| CCGGGCTAATGAAGCCGTGACCCAGAGACTG                   | 5,63  |
| TCTGATGCACCGGGAGCCAGCCACTTAGCTGT                  | 5,79  |
| GTCAGTGTGATCGCGAGTTCCTCTAGCTAGG                   | 7,31  |
| GTGATGCCAAAAGGGTGGATATGGAGCTGGAA                  | 7,47  |
| CGGCTCTGATTTCTAGTGACCTGGTATAATGG                  | 7,63  |
| CGGAGCTACCTGACCTCAATCATACGTCCCAC                  | 7,79  |
| GGAAGGATTATCCCCTTTAAGAATGATCGCA                   | 9,31  |
| CAGTCTTTGAGATGTTGAACATCTTTTGGTTG                  | 9,47  |
| GCGTAAAGATCTCGCATTCTGGTGCCAAAAC                   | 9,63  |
| GCCGACTCGTTCAAGCACTATTATCTGGCTAT                  | 9,79  |
| AAAAGATGTCGTGTCAGCCCAAGCTTAGCATAA                 | 11,31 |
| GCGGCTGGACGACCCCGCCGTGCGACGACTGA                  | 11,47 |
| CCGTGAGCCCTGCGCGACAAACGCATATCCT                   | 11,63 |
| CGGCCCGCCAAATTAATAGTCGATTACGCTTC                  | 11,79 |
| GCCTAAAGGTCCTCCACGGTAATCGGGGGTACTCCGGCCTCCTGG     | 13,47 |
| TATATTAGCTTACCCACTCGCGTGGCAGCTCTACGACTCGTCAACGA   | 13,79 |
| GGACTGTTCTACATAGTGACTTGGACGAGGTTTCACTGGGCGCTATAC  | 17,31 |
| AGGAACTCGAGGGGCTCCCTGTCTGTCGAGC                   | 17,47 |
| CCAGCGACCCTTCTGGAGAAAGATGCGGTGGCAGTAGTTGTGATTAG   | 17,63 |
| CTTGGGGGTGATATACCTCACTAAACTCCTTC                  | 17,79 |
| TAATGTGACTAAGCGT                                  | 19,31 |
| TAACTCAAAGGAAACCAGCTATCCCATATTCGATGTAAGCGGACATC   | 19,63 |
| TATGCGCCGATATCCGTTCAAACCTAGGGGGC                  | 19,79 |
| TTCTGACCAAAGCTCA                                  | 22,16 |
| TGAGAATTGTAAACAGGAACAGCTTAGAGCAG                  | 23,31 |
| TCAAGTTCGGATACGCTACCTATGGACGGGGATATGCGACACCATGAT  | 23,47 |
| CCGGATGAGTTATGAAGATCGTCATTGGGATA                  | 23,63 |
| TACAATCTCGAAGTAAAGCATAGCACCTGCG                   | 23,79 |
| AAGATAGGGTACAGCAGTAATACCTCTACCT                   | 25,31 |
| TGTTGGACGTAAGCGTAAATAACGACCAGAA                   | 25,47 |
| AGCACGAGGATTATCAGTGTACCTCGAAATA                   | 25,63 |
| ATCGTTAGTTTCTCGACTGTTCCGAAACAGGC                  | 25,79 |
| AGCGGTAGCCTCCACTTAACCTATGCCTTGG                   | 27,31 |
| TAACTGATTTTCTCCTGGTTCGGCTAGCTGAT                  | 27,47 |
| CTATGGTCTTAATATAACCCTCGGAGGCAAG                   | 27,63 |
| GGGAGAGGGTGAAACAGGCCACCTGGCTCGGG                  | 27,79 |
| GAGTGCCCCCTCGGCAGCCGCTCGGTTATAC                   | 29,31 |
| TCGTCAAGCCTGCTTCCATAGCTAACCCGAT                   | 29,47 |
| TGTGCATTCCACGTGAGTCTGACTTAAAGCAA                  | 29,63 |
| ACGTGGGAGTGCCCGAGCGTCTGAGGTATGGT                  | 29,79 |
| TTACCCACTATGTTGTCTCAAGTGCTAACAGT                  | 31,31 |
| ACTAATTATCCATAACTGTGCACGTCAGGGAT                  | 31,47 |
| TCTACCGGTGGCCGTTGCTACATCAGTTTCT                   | 31,63 |
| TTGCACTCCTGGGAAAATACTACTACGCACT                   | 31,79 |
| GGTTTGGAGGGATTAGGCAATTGCTAGGTTGC                  | 33,31 |
| ATTGTAGGCACAATTTTGAITCGATCACATA                   | 33,47 |
| CATGGGCAATAAAGCTGTAGCCTGAGGCGCGC                  | 33,63 |
| AGCTGCACCGTGTACCTTGATATTGAGGGAC                   | 33,79 |
| ACCTCGTCATTCGGATAAACCATACTGAGGGC                  | 35,31 |
| AGTGGGCGAGATCGGCTAATCATTAGTGCTCC                  | 35,47 |
| CTTAGTTAGTTCATAGTTCATTAGGGGCGGAA                  | 35,63 |
| ATGGGCTGGTGCCCCACGTACAGTAACCAACC                  | 35,79 |
| GTATGATTTTTTTTT                                   | 0,23  |
| ACCCGAGCGTTCCGGTTTCAGAAACAACCGTGACATCTTTTGGGGTCGT | 0,55  |
| TTTTTTTTACAGCTAAGTGGCTGGTTGAGACTCTCGACGGTTAATTTG  | 0,87  |

|                                                      |       |
|------------------------------------------------------|-------|
| CACTGAGTTTTTTTTT                                     | 2,23  |
| ATTTCCGCCATCCCTAAGTAAACTACTCGATATCCTTCCAACATCTC      | 2,55  |
| TTTTTTTTTCCGGTTTAGCGAATTGCGGCCATCTTACGCGCTTGAAC      | 2,87  |
| GTATTAGCTTTTTTTT                                     | 4,23  |
| GGGGTCACAAGTGTGTACCGTTCGGCTCAGCACACTGACACCCTTTT      | 4,55  |
| TTTTTTTTTAAAGCGTTACAGGCGGCAGTCTCTCAGAGCCGAGGTCAGG    | 4,87  |
| AGCTTGGGTTTTTTTTTTTTTTTTTTTTTAAAGCCCGGGCTGATCCCGCAAC | 6,23  |
| CCATATCCTTATGCTAAACAGTCCGCCCTCG                      | 6,39  |
| CGTTTGTCTTCCAGCTAACAGCATGGCTTATTAGCCCGGCTCCCGGT      | 6,55  |
| TATGATTGAGGATATGGTCTGGGTATATCA                       | 6,71  |
| TTTTTTTTGTGGGACGGCATCAGATTTTTTTTT                    | 6,87  |
| GAGGGAACTTTTTTTTTTTTTTTTTGGAGATGCGGATACTTTGAAAAGGC   | 8,23  |
| AGATGTTCCCTAGCTA                                     | 8,39  |
| CCAGGTCACAACCAAAGACATGAATACTCTGAATGAACACCCCGCTGC     | 8,55  |
| ATAATAGTCCATTATA                                     | 8,71  |
| TTTTTTTTATAGCCAGGCACCGAATTTTTTTTT                    | 8,87  |
| TTTTTTTTTGGGGATGA                                    | 9,8   |
| AAAGACTGTGCGAGAT                                     | 9,40  |
| GAGTCGGCTTTTTTTTT                                    | 9,72  |
| TTCTTAAATTTTTTTTTTTTTTTTTTGGAGCCACTTAACCTGGATAGGACA  | 10,23 |
| CGCACGGCTGCGATCAATTACCGTGAAGGAC                      | 10,39 |
| CACCAGAATCAGTCGTCAACAGTTGTGCGTTGAGTTCGTATATGCTCT     | 10,55 |
| ATCGACTAAGTTTTGGCACGCGAGTGGGTAAG                     | 10,71 |
| TTTTTTTTGAAGCGTACTATCTCTTTTTTTTT                     | 10,87 |
| GCCGGAGTTTTTTTTTTTTTTTTTCTGACAGA                     | 12,23 |
| GACAGGGACCAAGGAGAATCTCAGCGTATCC                      | 12,39 |
| CGAGTCGTGCTCGACACCCAGCCGCGCAGGG                      | 12,55 |
| TTAGTGAGTCGTTTCGATCATCCGGTACTTCG                     | 12,71 |
| TTTTTTTTGAAGGAGTGCAGGCGCTTTTTTTTT                    | 12,87 |
| CCAAGTCATTTTTTTTTTTTTTTTTTCGCGATC                    | 16,23 |
| CCCAGTGAAACCTCGTTCACATTAGAATATGG                     | 16,39 |
| TCTTTCGTATAGCGGGCATCACCTAGAAAT                       | 16,55 |
| AACTACTGCCACCGCATGGAGTTAGGATATCG                     | 16,71 |
| TTTTTTTTCTAATCACTAGCTCCGTTTTTTTTT                    | 16,87 |
| AGCTGTTCTTTTTTTTTTTTTTTCTATGTAG                      | 18,23 |
| CTACATCTGCTCTAGGGCACTCAAAGCAGG                       | 18,39 |
| TGACGATCGATGTCCGAGTTTCTCAGAAGTG                      | 18,55 |
| GTTTGAAGTATCCAAAATGCACATCGGGCAC                      | 18,71 |
| TTTTTTTTGCCCCCTACCCCAAGTTTTTTTTT                     | 18,87 |
| GGTCAGAAATTTTTTTTTTTTTTTTACCCCGG                     | 22,23 |
| CATAGGTATGAGCTTTCCTATCTACGTTAC                       | 22,39 |
| GTCGCATATCCCGTCTCTTAGGCAGACGTGC                      | 22,55 |
| GCTATGCTATCATGGTCTCGTGCTTCGAGAAA                     | 22,71 |
| TTTTTTTTCGCAGGGTCTAATATATTTTTTTT                     | 22,87 |
| GTATTACTTTTTTTTTTTTTTTCTGTTTAC                       | 24,23 |
| AGCTATGGAGGTAGAGGACGAGGTGCGGATCTCGCCACTCTATGAAC      | 24,39 |
| GGTACACGATCGGGTTGAACCTTGATTCAAAC                     | 24,55 |
| TCAGACGCTATTTGATAACTAAGTGGGGCACCAGCCATTTTTTTTTT      | 24,71 |
| TTTTTTTTACCATACCAGATTGATTTTTTTTT                     | 24,87 |
| TAGGTTAATTTTTTTTTT                                   | 26,23 |
| GTTATTTCCCAAGGCATCCAAACCAAATTGTGCCTACAATAGCTTTAT     | 26,39 |
| CGAGGGTTTTCTGGTC                                     | 26,55 |
| CGAACAGCTTGCCCTGCCCATGGTGACACGGTGCAGCTTTTTTTTTT      | 26,71 |
| TTTTTTTTGCCTGTTT                                     | 26,87 |
| CTACCGCTAGGAGAAA                                     | 27,24 |
| GACCATAGTGTTCAC                                      | 27,56 |
| GAGGCGGCTTTTTTTTTTTTTTTTACGCTTAG                     | 28,23 |
| GCGGAACCGTATAACCGTGGGTAAGTTATGGATAATTAGTACGGCCAC     | 28,39 |
| AGTACGACATCAGCTAGATAGCTGGTTTCCTT                     | 28,55 |
| AGGTGGCCTTGCTTACGGTGAGATTCGCCAGGAGTGCAATTTTTTTTTT    | 28,71 |
| TTTTTTTTCCCGAGCCGCGCATATTTTTTTTT                     | 28,87 |
| CGTGACAGCCCTCAGTATGGTTTTTTTTTTTTTTTTTTTGGCGAGG       | 30,39 |
| AGTATAGTTCCGCCCCAATGAAATCCCTGACTTGACGATCACGTGG       | 30,71 |
| TTTTTTTTAGTGCGTATCCCACGTTTTTTTTTT                    | 30,87 |
| TTTTTTTTTACAACATA                                    | 31,8  |
| CGAATCAAACGTGTAGCACTTGAGTTTTTTTTTTTTTTTTTGTGGGAGG    | 32,39 |
| ATATCAAGAGAAAAGTATGTAGCATATGTGATATCAGTTAATATTAAG     | 32,71 |
| TTTTTTTTGTCCCTCACCTCTCCCTTTTTTTTT                    | 32,87 |

|                                                  |       |
|--------------------------------------------------|-------|
| TTTTTTTCTAATCCC                                  | 33,8  |
| AATGATTAGCAACCTAGCAATTGCTTTTTTTTTTTTTTTGCTGTGAC  | 34,39 |
| ACTGTACGGCGCGCCTCAGGCTACGGAGCACTGTCCAACATGATAATC | 34,71 |
| TTTTTTTGGTTGGTTCTAACGATTTTTTTTT                  | 34,87 |
| TTTTTTTATCCGAAT                                  | 35,8  |

## S3.1 ZX-4H×4H×32B-cuboid crystal sequences

|                                                   |       |
|---------------------------------------------------|-------|
| CCAGGTTAAGTGGCTCAATCATACTCACGGTT                  | 1,23  |
| AACTGTTGTGTCCTATGTTTACTTAGGGATGG                  | 1,39  |
| TACGAACTCAACGCACGCTCGGGTAGTCTCAA                  | 3,23  |
| GAAGATAGAGAGCATAAATTCGCTAAACCGGA                  | 3,39  |
| AAAGTATCCGCATCTCACTCAGTGATCGAGTA                  | 5,23  |
| TTCATGTCGCCTTTTCGAACGGTGACACACTT                  | 5,39  |
| GTGTTCAITCAGAGTAGCGGAAATATGGCCGC                  | 7,23  |
| TTCGGTGCGCAGCGGGCCGCTGTAACGCTTA                   | 7,39  |
| ATCAGCCCGGGCTTTTGCTAATACGCTGAGCG                  | 9,23  |
| ATGCTGTTGTTGCGGGGTTTCTGAACCGGAAC                  | 9,39  |
| CCGGGCTAATGAAGCCGTGACCCAGAGACTG                   | 11,23 |
| TCTGATGCACCGGGAGCCAGCCACTTAGCTGT                  | 11,39 |
| GTCAGTGTGATCGCGAGTTCCTCTAGCTAGG                   | 13,23 |
| GTGATGCCAAAAGGGTGGATATGGAGCTGGA                   | 13,39 |
| CGGCTCTGATTTCTAGTGACCTGGTATAATGG                  | 15,23 |
| CGGAGCTACCTGACCTCAATCATACTGCCAC                   | 15,39 |
| GTATGATTCCGGTTTAGCGAATTAACCGTGAATGAACACCCCGCTGC   | 0,15  |
| ACCCGAGCCCATCCCTAAGTAACTTGAGACTGATACTTTGAAAAGGC   | 2,15  |
| ATTTCCGCAAGTGTGTCTATCTTCGTGCGTTGAGTTCGTATATGCTCT  | 4,15  |
| CACCGTTTCGCGGCCATTAGCCCGGCTCCCGGT                 | 4,31  |
| CACTGAGTTAAGCGTTCAACAGTTGAGCCACTTAACCTGGATAGGACA  | 6,15  |
| ACAGGCGGTACTCGATGGGCTGATCCCGCAAC                  | 6,31  |
| GTATTAGCACAGCTAAGCACCGAATACTCTGA                  | 8,15  |
| GTGGCTGGCGCTCAGCCAGAGCCGAGGTCAGGTAGCTCCGCTAGAAAT  | 8,31  |
| GGGGTCACGTTCCGGTGACATGAAGAGATGCG                  | 10,15 |
| TCAGAAACCAGTCTTACACTGACACCCTTTTGGCATCACTCGCGATC   | 10,31 |
| CCATATCCCATTTATACCAGGTCATTCCAGCTGCATCAGAGGCTTCAT  | 12,31 |
| TATGATTGCCTAGCTAGAGGGAACGTGGGACGAACAGCATAAAAAGCCC | 14,31 |

## S3.2 ZX-4H×6H×32B-cuboid crystal sequences

|                                                  |       |
|--------------------------------------------------|-------|
| CCAGGTTAAGTGGCTCAATCATACTCACGGTT                 | 1,23  |
| AACTGTTGTGCTATGTTTACTTAGGGATGG                   | 1,39  |
| TACGAACTCAACGCACGCTCGGGTAGTCTCAA                 | 3,23  |
| GAAGATAGAGAGCATAAATTCGCTAAACCGGA                 | 3,39  |
| AAAGTATCCGCATCTCACTCAGTGATCGAGTA                 | 5,23  |
| TTCATGTCGCCTTTTCGAACGGTGACACACTT                 | 5,39  |
| GTGTTTCAATCAGAGTAGCGGAAATATGGCCGC                | 7,23  |
| TTCGGTGCGCAGCGGGCCGCTGTAACGCTTA                  | 7,39  |
| ATCAGCCCCGGGCTTTTGCTAATACGCTGAGCG                | 9,23  |
| ATGCTGTTGTTGCGGGGTTTCTGAACCGGAAC                 | 9,39  |
| CCGGGCTAATGAAGCCGTGACCCAGAGACTG                  | 11,23 |
| TCTGATGCACCGGGAGCCAGCCACTTAGCTGT                 | 11,39 |
| GTCAGTGTGATCGCGAGTTCCTCTAGCTAGG                  | 13,23 |
| GTGATGCCAAAAGGGTGGATATGGAGCTGGAA                 | 13,39 |
| CGGCTCTGATTTCTAGTGACCTGGTATAATGG                 | 15,23 |
| CGGAGCTACCTGACCTCAATCATACTGCCAC                  | 15,39 |
| GGAAGGATTCATCCCTTTAAGAATGATCGCA                  | 17,23 |
| CAGTCTTTGAGATGTTGAACATCTTTTGGTTG                 | 17,39 |
| GCGTAAAGATCTCGCATTCTGGTGCCAAAAC                  | 19,23 |
| GCCGACTCGTTCAAGCACTATTATCTGGCTAT                 | 19,39 |
| AAAAGATGTCTGTCAGCCCAAGCTTAGCATAA                 | 21,23 |
| GCGGCTGGACGACCCCGCGTGCGACGACTGA                  | 21,39 |
| CCGTCGAGCCCTGCGCGACAAACGCATATCCT                 | 23,23 |
| CGGCCCCGCAAATTAATAGTCGATTACGCTTC                 | 23,39 |
| GTATGATTTCCGGTTTAGCGAATTAACCGTGAATGAACACCCCGCTGC | 0,15  |
| ACCCGAGCCCATCCCTAAGTAACTTGAGACTGATACTTTGAAAAGGC  | 2,15  |
| ATTTCCGCAAGTGTGTCTATCTTCGTGCGTTGAGTTCGTATATGCTCT | 4,15  |
| CACCGTTCGCGGCCATTAGCCCGGCTCCCGGT                 | 4,31  |
| CACTGAGTTAAGCGTTCAACAGTTGAGCCACTTAACCTGGATAGGACA | 6,15  |
| ACAGGCGGTAICTGATGGGCTGATCCCGCAAC                 | 6,31  |
| GTATTAGCACAGCTAAGCACCGAATACTCTGA                 | 8,15  |
| GTGGCTGGCGCTCAGCCAGAGCCGAGGTCAGG                 | 8,31  |
| GGGGTCACGTTCCGGTGACATGAAGAGATGCG                 | 10,15 |
| TCAGAAACCAGTCTCTACACTGACACCTTTT                  | 10,31 |
| CCAGGTCATTCCAGCTGCATCAGAGGCTTCAT                 | 12,15 |
| CCATATCCCATTATACTTTACGCGCTTGAAC                  | 12,31 |
| GAGGGAACGTGGGACGAACAGCATAAAAGCCC                 | 14,15 |
| TATGATTGCCTAGCTAATCCTTCCAACATCTC                 | 14,31 |
| TTCTTAAAATAGCCAGTAGCTCCGCTAGAAAT                 | 16,15 |
| ATAATAGTTGCGATCACTCGACGGTTAATTTGGCGGGCCGGCGCAGGG | 16,31 |
| CACCAGAACAACCAAGGCATCACTCGCGATC                  | 18,15 |
| AGATGTTCAAGTTTGGCATCTTTTGGGGTTCGTCCAGCCGCTGACAGA | 18,31 |
| CGCACGGCAGGATATGCGTTTGTCTCAGTCGTGAGTCGGCTGCGAGAT | 20,31 |
| ATCGACTATATGCTAAGCTTGGGGAAGCGTAAAAGACTGGGGGATGA  | 22,31 |

## S3.3 ZX-4H×10H×32B-cuboid crystal sequences

|                                                  |       |
|--------------------------------------------------|-------|
| CCAGGTTAAGTGGCTCAATCATACTCACGGTT                 | 1,23  |
| AACTGTTGTGTCCTATGTTACTTAGGGATGG                  | 1,39  |
| TACGAACTCAACGCACGCTCGGGTAGTCTCAA                 | 3,23  |
| GAAGATAGAGAGCATAAATTCGCTAAACCGGA                 | 3,39  |
| AAAGTATCCGCATCTCACTCAGTGATCGAGTA                 | 5,23  |
| TTCATGTCGCCTTTTCGAACGGTGACACACTT                 | 5,39  |
| GTGTTCAITCAGAGTAGCGGAAAATATGGCCGC                | 7,23  |
| TTCGGTGCGCAGCGGGCCGCTGTAACGCTTA                  | 7,39  |
| ATCAGCCCCGGCTTTTGCTAATACGCTGAGCG                 | 9,23  |
| ATGCTGTTGTTGCGGGGTTTCTGAACCGGAAC                 | 9,39  |
| CCGGGCTAATGAAGCCGTGACCCAGAGACTG                  | 11,23 |
| TCTGATGCACCGGGAGCCAGCCACTTAGCTGT                 | 11,39 |
| GTCAGTGTGATCGCGAGTTCCTCTAGCTAGG                  | 13,23 |
| GTGATGCCAAAAGGGTGGATATGGAGCTGGAA                 | 13,39 |
| CGGCTCTGATTTCTAGTGACCTGGTATAATGG                 | 15,23 |
| CGGAGCTACCTGACCTCAATCATACTGCCAC                  | 15,39 |
| GGAAGGATTATCCCTTTAAGAATGATCGCA                   | 17,23 |
| CAGTCTTTGAGATGTTGAACATCTTTGGTTG                  | 17,39 |
| GCGTAAAGATCTCGCATCTGGTGCCAAAAC                   | 19,23 |
| GCCGACTCGTTCAAGCACTATATCTGGCTAT                  | 19,39 |
| AAAAGATGTCTGTCAGCCAAAGCTTAGCATAA                 | 21,23 |
| GCGGCTGGACGACCCCGCGTGCGACGACTGA                  | 21,39 |
| CCGTGAGCCCTGCGCGACAAACGCATATCCT                  | 23,23 |
| CGGCCCGCCAAATTAATAGTCGATTACGCTTC                 | 23,39 |
| GCCTAAAGGTCTTCACGGTAATCGGGGGTG                   | 25,23 |
| ACTCCGGCTCCTTGGTATATTAGCTTACCCA                  | 25,39 |
| CTCGCGTGGCACGCTACGACTCGTCGAACGA                  | 27,23 |
| GGACTGTTCTACATAGTGACTTGGACGAGGTT                 | 27,39 |
| TCACTGGGCGCTATACAGGAAACTCGAGGGGC                 | 29,23 |
| TCCCTGTCTGTGAGCCAGCGACCACTTCTG                   | 29,39 |
| GAGAAAGATGCGGTGGCAGTAGTTGTGATTAG                 | 31,23 |
| CTTGGGGGTGATATACCTCACTAAACTCCTTC                 | 31,39 |
| TAATGTGACTAAGCGTAACTCCAAAGGAAAC                  | 33,23 |
| CAGCTATCCATATTCGATGTAAGCGGACATC                  | 33,39 |
| TATGCGCCCGATATCCGTTCAAACCTAGGGGGC                | 35,23 |
| TTCTGACCAAAGCTCATGAGAATTGTAAACAG                 | 35,39 |
| GAACAGCTTAGAGCAGTCAAGTTCGGATACGC                 | 37,23 |
| TACCTATGGACGGGATATGCGACACCATGAT                  | 37,39 |
| CCGGATGAGTTATGAAGATCGTATTGGGATA                  | 39,23 |
| TACAATCTCGAAGTAAAGCATAGCACCCCTGCG                | 39,39 |
| GTATGATTCCGGTTTAGCGAATTAACCGTGAATGAACCCCCGCTGC   | 0,15  |
| ACCCGAGCCCATCCCTAAGTAAACTTGAGACTGATACTTTGAAAAGGC | 2,15  |
| ATTTCCGCAAGTGTGCTATCTTCGTGCGTTGAGTTCGTATATGCTCT  | 4,15  |
| CACCGTTCCGGGCCATTAGCCCGGCTCCCGGT                 | 4,31  |
| CACTGAGTTAAGCGTTCAACAGTTGAGCCACTTAACCTGGATAGGACA | 6,15  |
| ACAGGCGGTACTCGATGGGCTGATCCCGCAAC                 | 6,31  |
| GTATTAGCACAGCTAAGCACCGAATACTCTGA                 | 8,15  |
| GTGGCTGGCGCTCAGCCAGAGCCGAGGTCAGG                 | 8,31  |
| GGGGTACGTTCCGGTGACATGAAGAGATGCG                  | 10,15 |
| TCAGAAACCAGTCTTACACTGACACCCTTTT                  | 10,31 |
| CCAGGTCATTCCAGCTGCATCAGAGGCTTCAT                 | 12,15 |
| CCATATCCCATTATACTTTACGCGCTTGAAC                  | 12,31 |
| GAGGGAACGTGGGACGAACAGCATAAAAGCCC                 | 14,15 |
| TATGATTGCCTAGCTAATCCTTCCAACATCTC                 | 14,31 |
| TTCTTAAAATAGCCAGTAGTCCGCTAGAAAT                  | 16,15 |
| ATAATAGTTGCGATCACTCGACGGTTAATTTG                 | 16,31 |
| CACCAGAACAACCAAAGGCATCACTCGCGATC                 | 18,15 |
| AGATGTTCAAGTTTGGCATCTTTGGGGTTCGT                 | 18,31 |
| CGTTTGTCTCAGTCTGAGTCCGCTGCGAGAT                  | 20,15 |
| CGCACGGCAGGATATGCACGCGAGCTATGTAG                 | 20,31 |
| AGCTTGGGGAAGCGTAAAAGACTGGGGGATGA                 | 22,15 |
| ATCGACTATTATGCTACTTTAGGCCAAAGGAG                 | 22,31 |
| ATTACCGTAACTCGTGCGGGCCGGCGCAGGG                  | 24,15 |
| CCAAGTCAACCCCCGTCTTTCTCGTATATCA                  | 24,31 |
| CGAGTCGTTGGGTAAGCCAGCCGCTGACAGA                  | 26,15 |
| CTAATATATCGTTTCGACCCAGTGAGCTCGACA                | 26,31 |



|                                                      |       |
|------------------------------------------------------|-------|
| AACTACTGCAGAAGTGAACAGTCCAGACGTGC                     | 28,15 |
| GTCGCTGGCTAATCACGGCGCATATGAGCTTT                     | 28,31 |
| AGTTTCCTGAAGGAGTGCCGGAGTGAAGGAC                      | 30,15 |
| TTAGTGAGGCCCTCGTCACATTAGAATATGG                      | 30,31 |
| TGGAGTTACTGTTACCCCCAAGCCACCGCA                       | 32,15 |
| AATTCTCAGTTTCCTTTCATCCGGTACTTCGAGATTGTATTCATAAC      | 32,31 |
| GTTTGAACGATGTCCGGACAGGGAGTATAGCG                     | 34,15 |
| CTTACATCGCCCCCTAAGCTGTTCTCCCCGTCCATAGGTAAGTACTGCTCTA | 34,31 |
| GTCGCATATATCCCAATGACGATCATCATGGTGGTCAGAAGGATATCG     | 36,31 |
| GCTATGCTGCGTATCCGAACCTTGACGCAGGGTGATAGCTGACGCTTAG    | 38,31 |

## S3.4 ZX-4H×20H×32B-cuboid crystal sequences

|                                   |       |
|-----------------------------------|-------|
| CCAGGTTAAGTGGCTCAATCATACTCACGGTT  | 1,23  |
| AACTGTTGTGTCCTATGTTACTTAGGGATGG   | 1,39  |
| TACGAACTCAACGCACGCTCGGGTAGTCTCAA  | 3,23  |
| GAAGATAGAGAGCATAAATTCGCTAAACCGGA  | 3,39  |
| AAAGTATCCGCATCTCACTCAGTGATCGAGTA  | 5,23  |
| TTCATGTCGCCTTTTCGAACGGTGACACACTT  | 5,39  |
| GTGTTCAITCAGAGTAGCGGAAAATATGGCCGC | 7,23  |
| TTCGGTGCGCAGCGGGCCGCTGTAACGCTTA   | 7,39  |
| ATCAGCCCCGGGCTTTTGCTAATACGCTGAGCG | 9,23  |
| ATGCTGTTGTTGCGGGGTTTCTGAACCGGAAC  | 9,39  |
| CCGGGCTAATGAAGCCGTGACCCAGAGACTG   | 11,23 |
| TCTGATGCACCGGGAGCCAGCCACTTAGCTGT  | 11,39 |
| GTCAGTGTGATCGCGAGTTCCTCTAGCTAGG   | 13,23 |
| GTGATGCCAAAAGGGTGGATATGGAGCTGGAA  | 13,39 |
| CGGCTCTGATTTCTAGTGACCTGGTATAATGG  | 15,23 |
| CGGAGCTACCTGACCTCAATCATACTGCCAC   | 15,39 |
| GGAAGGATTATCCCTTTAAGAATGATCGCA    | 17,23 |
| CAGTCTTTGAGATGTTGAACATCTTTGGTTG   | 17,39 |
| GCGTAAAGATCTCGCATTCTGGTGCCAAAAC   | 19,23 |
| GCCGACTCGTTCAAGCACTATTATCTGGCTAT  | 19,39 |
| AAAAGATGTCTGTCAGCCCAAGCTTAGCATAA  | 21,23 |
| GCGGCTGGACGACCCCGCCGTGCGACGACTGA  | 21,39 |
| CCGTGAGCCCTGCGCGACAAACGCATATCCT   | 23,23 |
| CGGCCCGCCAAATTAATAGTCGATTACGCTTC  | 23,39 |
| GCCTAAAGGTCTTCACGGTAATCGGGGGTG    | 25,23 |
| ACTCCGGCTCCTTGGTATATTAGCTTACCCA   | 25,39 |
| CTCGCGTGGCACGTCTACGACTCGTCGAACGA  | 27,23 |
| GGACTGTTCTACATAGTGACTTGGACGAGGTT  | 27,39 |
| TCACTGGGCGCTATACAGGAAACTCGAGGGGC  | 29,23 |
| TCCCTGTCTGTCGAGCCAGCGACCACTTCTG   | 29,39 |
| GAGAAAGATGCGGTGGCAGTAGTTGTGATTAG  | 31,23 |
| CTTGGGGGTGATATACCTCACTAAACTCCTTC  | 31,39 |
| TAATGTGACTAAGCGTAACTCCAAAGGAAAC   | 33,23 |
| CAGCTATCCATATTCGATGTAAGCGGACATC   | 33,39 |
| TATGCGCCCGATATCCGTTCAAACCTAGGGGGC | 35,23 |
| TTCTGACCAAAGCTCATGAGAATTGTAAACAG  | 35,39 |
| GAACAGCTTAGAGCAGTCAAGTTCGGATACGC  | 37,23 |
| TACCTATGGACGGGATATGCGACACCATGAT   | 37,39 |
| CCGGATGAGTTATGAAGATCGTCATTGGGATA  | 39,23 |
| TACAATCTCGAAGTAAAGCATAGCACCCCTGCG | 39,39 |
| AAGATAGGGTCACAGCAGTAATACCTTACCT   | 41,23 |
| TGTTGGACGTAAGCGTGAAATAACGACCAGAA  | 41,39 |
| AGCACGAGGATTATCACGTGTACCTCGAAATA  | 43,23 |
| ATCGTTAGTTTCTCGACTGTTCCGAAACAGGC  | 43,39 |
| AGCGGTAGCCTCCCACTTAACCTATGCCTTGG  | 45,23 |
| TAACTGATTTTCTCCTGGTCCGCTAGCTGAT   | 45,39 |
| CTATGGTCTTAATATAACCCTCGGAGGCAAG   | 47,23 |
| GGGAGAGGGTGAAACAGGCCACCTGGCTCGGG  | 47,39 |
| GAGTGCCCCCTCGGCAGCCGCCTCGGTTATAC  | 49,23 |
| TCGTCAAGCCTGCTTTCCATAGCTAACCCGAT  | 49,39 |
| TGTGCATTCCACGTGAGTCGTAATAAGCAA    | 51,23 |
| ACGTGGGAGTGCCCCGAGCGTCTGAGGTATGGT | 51,39 |
| TTACCCACTATGTTGTCTCAAGTGCTAACAGT  | 53,23 |
| ACTAATTATCCATAACTGTGCACGTCAGGGAT  | 53,39 |
| TCTCACCGGTGGCCGTTGCTACATCAGTTTCT  | 55,23 |
| TTGCACTCCTGGGGAAACTATACTTACGCACT  | 55,39 |
| GGTTTGGAGGGATTAGGCAATTGCTAGGTTGC  | 57,23 |
| ATTGTAGGCACAATTTTGTTCGATCACATA    | 57,39 |
| CATGGGCAATAAAGCTGTAGCCTGAGGCGCGC  | 59,23 |
| AGCTGCACCGTGTACCTTGATATTGAGGGAC   | 59,39 |
| ACCTCGTCATTCGGATAAACCATACTGAGGGC  | 61,23 |
| AGTGGGCGAGATCGGCTAATCATTAGTGCTCC  | 61,39 |
| CTTAGTTAGTTCATAGTTCATTAGGGGCGGAA  | 63,23 |
| ATGGGCTGGTGCCCCACGTACAGTAACCAACC  | 63,39 |
| GGGTACCTGTGGGTAGGGCCGAGCGCTGGGC   | 65,23 |
| TTACATGTGCAAGTGAATATATGACTTGCTC   | 65,39 |

|                                                  |       |
|--------------------------------------------------|-------|
| GACCAGATCTGCTAGAAAACCAACATCCTC                   | 67,23 |
| CTTGACACCTTCAATTTTAGTAAACACCCA                   | 67,39 |
| ACAGAGCTGAACTTCCCATGGTCTTCTACTG                  | 69,23 |
| TCGTATGATCATAGGATCAAATAAATACAGC                  | 69,39 |
| GTACCGCCAGTCTTGTCTTATTGGCGATCG                   | 71,23 |
| TGCATTCCAATGTTTGATGGCCGCGTGGCTTA                 | 71,39 |
| TAAAGACGGCCGGTGAACACATAAAAGTCGT                  | 73,23 |
| CCGCCTCCGGTAGTCAACGCGGAACGTAATGG                 | 73,39 |
| CAGAAAGTCTATACCCGACAAAACAGATTG                   | 75,23 |
| TACCGGGGTGAACAGCAGTGC GGCTTCTCCT                 | 75,39 |
| GTATCGCCTTGTGTATTATACTTTGCCGGGG                  | 77,23 |
| GGTCGAGCGCTCCACTGTAGTGGCCGGCCATC                 | 77,39 |
| GTGGACTAGAAAGCGCCGCAATCTGAATATC                  | 79,23 |
| GTACTCCTCCGATACGCGAACAGAACCATTTA                 | 79,39 |
| GTATGATTTCCGGTTTAGCGAATTAACCGTGAATGAACACCCCGCTGC | 0,15  |
| ACCCGAGCCCATCCCTAAGTAACTTGAGACTGATACTTTGAAAAGGC  | 2,15  |
| ATTTCCGCAAGTGTGTCTATCTTCGTGCGTTGAGTTCGTATATGCTCT | 4,15  |
| CACCGTTCCGGGCCATTAGCCCGGCTCCCGGT                 | 4,31  |
| CACTGAGTTAAGCGTTCAACAGTTGAGCCACTTAACCTGGATAGGACA | 6,15  |
| ACAGGCGGTACTCGATGGGCTGATCCCGCAAC                 | 6,31  |
| GTATTAGCACAGCTAAGCACCGAATACTCTGA                 | 8,15  |
| GTGGCTGGCGCTCAGCCAGAGCCGAGGTCAGG                 | 8,31  |
| GGGGTCACGTTCCGGTGACATGAAGAGATGCG                 | 10,15 |
| TCAGAAACCAGTCTCTACACTGACCCCTTTT                  | 10,31 |
| CCAGGTCATTCAGCTGCATCAGAGGCTTCAT                  | 12,15 |
| CCATATCCCATTATACTTTACGCGCTTGAAC                  | 12,31 |
| GAGGGAACGTGGGACGAACAGCATAAAAAGCCC                | 14,15 |
| TATGATTGCCTAGCTAATCCTTCCAACATCTC                 | 14,31 |
| TTCTTAAAATAGCCAGTAGTCCGCTAGAAAT                  | 16,15 |
| ATAATAGTTGCGATCACTCGACGGTTAATTTG                 | 16,31 |
| CACCAGAACAACAAAGGCATCACTCGCGATC                  | 18,15 |
| AGATGTTCAAGTTTTGGCATCTTTTGGGGTCGT                | 18,31 |
| CGTTTGTCTCAGTCGTGAGTCGGCTGCGAGAT                 | 20,15 |
| CGCACGGCAGGATATGCACGCGAGCTATGTAG                 | 20,31 |
| AGCTTGGGGAAGCGTAAAAGACTGGGGGATGA                 | 22,15 |
| ATCGACTATTATGCTACTTTAGGCCAAAGGAG                 | 22,31 |
| ATTACCGTAACTCGTGC GGCGCCGGCGCAGGG                | 24,15 |
| CCAAGTCACACCCCGTCTTTCTCGTATATCA                  | 24,31 |
| CGAGTCGTTGGGTAAGCCAGCCGCTGACAGA                  | 26,15 |
| CTAATATATCGTTCCGACCCAGTGAGCTCGACA                | 26,31 |
| AACTACTGCAGAAGTGAACAGTCCAGACGTGC                 | 28,15 |
| GTCGCTGGCTAATCACGGCGCATATGAGCTTT                 | 28,31 |
| AGTTTCTGAAGGAGTGCCGGAGTGAAGGAC                   | 30,15 |
| TTAGTGAGGCCCTCGTCACATTAGAATATGG                  | 30,31 |
| TGGAGTTACTGTTTACCCCCAAGCCACCGCA                  | 32,15 |
| AATFTCTAGTTTCTTTTATCCGGTTACTTCG                  | 32,31 |
| GTTTGAACGATGTCCGGACAGGGAGTATAGCG                 | 34,15 |
| CTTACATCGCCCCCTAAGCTGTTCTCCCGTC                  | 34,31 |
| TGACGATCATCATGGTGGTCAAGGATATCG                   | 36,15 |
| GTCGCATATATCCCAACTCGTGCTTCGAGAAA                 | 36,31 |
| GAACCTTGACGCAGGGTGATAGCTGACGCTTAG                | 38,15 |
| GCTATGCTGCGTATCCCTATCTTACGCTTAC                  | 38,31 |
| GTATTACTGCCTGTTTAGATTGTATTATAAC                  | 40,15 |
| CGGAACAGAGGTAGAGGACCATAGTGTTCAC                  | 40,31 |
| GGTACACGTTCTGGTCCATAGGTAAGTCTCTA                 | 42,15 |
| GTTATTCTATTTTCGACTACCGCTAGGAGAAA                 | 42,31 |
| CGAGGGTTATCAGCTACTAACGATTGATAATC                 | 44,15 |
| GCGGAACCCCTTGCCTCAATGCACATCGGGCAC                | 44,31 |
| TAGGTAAACCCGAGCCGTCCAACAGCTGTGAC                 | 46,15 |
| AGGTGGCCCCAAGGCAGGGCACTCAAAGCAGG                 | 46,31 |
| GAGGCGCACCATACCCCTCTCCATATTAAG                   | 48,15 |
| TCAGACGCGTATAACCCGGTGAGATTCCCCAG                 | 48,31 |
| AGTACGACATCGGGTTATCAGTTAGTGGGAGG                 | 50,15 |
| AGCTATGGTTGCTTTAGTGGGTAAGTTATGGA                 | 50,31 |
| ATGTAGCAATCCCTGATCCCACGTTACAGTGG                 | 52,15 |
| CGTGCACAAGAAACTGTGCCATGGTGACACG                  | 52,31 |
| CACTTGAGAGTGCGTACTTGACGATGCCGAGG                 | 54,15 |
| AGTATAGTACTGTTAGTCCAAACCAAATTGTG                 | 54,31 |

|                                                  |       |
|--------------------------------------------------|-------|
| GCAATTGCGTCCCTCAGAGTGCAAACGGCCAC                 | 56,15 |
| ATATCAAGGCAACCTATAACTAAGTGGGGCAC                 | 56,31 |
| CAGGCTACTATGTGATTAATTAGTACAACATA                 | 58,15 |
| CGAATCAAGCGCGCCTGACGAGGTGCCGATCT                 | 58,31 |
| CTAATGAAGGAGCACTGTGCAGCTAGCTTTAT                 | 60,15 |
| AATGATTATTCGCCCCTCTGGTCATTGAAAG                  | 60,31 |
| TATGGTTTGGTTGGTTCCTACAATCTAATCCC                 | 62,15 |
| ACTGTACGGCCCTCAGGGTACACCTCACTTGC                 | 62,31 |
| CTCGGCCCTGGGTGTTTCAGCCCATCTATGAAC                | 64,15 |
| TACTAAAAGCCCAAGCGGGCGGTACCAAACATT                | 64,31 |
| TGGTGGTTGACCAAGTCGCCCACTATCCGAAT                 | 66,15 |
| CATATATTGAGGATGTAGCTCTGTTCTATGA                  | 66,31 |
| AATAAGGAGCTGTATTGTGTCAAGTCTAGCAG                 | 68,15 |
| TAGTTTGACGATCGCCACTTCTGGCTGTCA                   | 68,31 |
| CGACCATGTAAGCCACACATGTAATACCCACA                 | 70,15 |
| GCGGCCATCAGTAGAACGTCTTAATGACTACC                 | 70,31 |
| ATGTGGTTAGGAGAAGGGAATGCACAAGAACT                 | 72,15 |
| CCGCACGTACGACTTTTAGTCCACGCGTATCGGAGGTAGCGCGCTTTC | 72,31 |
| TTTTGTCCCATTACGTCATACGAGGAAGTTC                  | 74,15 |
| TCCCGGTCAAATCTGGGCGATACAGTGGAGCGCTCGACCATACACAA  | 74,31 |
| GCCACTACGATATTCAGATTGCCGGATGGCCGCCCGGTAGGGTATAG  | 76,31 |
| TCTGGTTCCCCCGCAAGAGTATATAAATGGTGGAGGCGGACACCGGC  | 78,31 |

## S3.5 ZX-32H×64B-channel crystal sequences

|                                                   |       |
|---------------------------------------------------|-------|
| CCAGGTTAAGTGGCTCAATCATACTCACGGTAACTGTTGTGTCTAT    | 1,47  |
| GTTTACTTAGGGATGGTACGAACTCAACGCACGCTCGGGTAGTCTCAA  | 1,79  |
| GAAGATAGAGAGCATAAATTCGCTAAACCGGAAAAGTATCCGCATCTC  | 5,31  |
| ACTCAGTGATCGAGTATTCATGTCCCTTTTC                   | 5,47  |
| GAACGGTGACACACTTGTGTTCAATCAGAGTAGCGGAAATATGGCCGC  | 5,63  |
| TTCGGTGCAGCGGGCCGCTGTAACGCTTA                     | 5,79  |
| ATCAGCCCGGGCTTTTGTCTAATACGCTGAGCGATGCTGTTGTTGCGGG | 7,31  |
| GTTTCTGAACCGGAAACCGGGCTAATGAAGCCGTGACCCAGAGACTG   | 7,63  |
| TCTGATGCACCGGGAGCCAGCCACTTAGCTGT                  | 11,31 |
| GTCAGTGTGATCGCGAGTTCCTCTAGCTAGGGTGATGCCAAAAGGGT   | 11,47 |
| GGATATGGAGCTGGAACGGCTCTGATTTCTAG                  | 11,63 |
| TGACCTGGTATAATGGCGGAGCTACCTGACCTCAATCATACTGCCAC   | 11,79 |
| GGAAGGATTCATCCCTTTAAGAATGATCGCA                   | 13,31 |
| CAGTCTTTGAGATGTTGAACATCTTTTGGTTG                  | 13,47 |
| GCGTAAAGATCTCGCATTCTGGTGCCAAAAC                   | 13,63 |
| GCCGACTCGTTCAAGCACTATTATCTGGCTAT                  | 13,79 |
| AAAAGATGTCTGTACGCCAAGCTTAGCATAA                   | 15,31 |
| GCGGCTGGACGACCCCGCCGTGCGACGACTGA                  | 15,47 |
| CCGTCGAGCCCTGCGCGACAAACGCATATCCT                  | 15,63 |
| CGGCCCGCAAATTAATAGTCGATTACGCTTC                   | 15,79 |
| GCCTAAAGGTCCTTCCACGGTAATCGGGGGTG                  | 17,31 |
| ACTCCGGCCTCCTTGGTATATTAGCTTACCCA                  | 17,47 |
| CTCGGTGGCACGTCTACGACTCGTCGAACGA                   | 17,63 |
| GGACTGTTCTACATAGTGACTTGGACGAGGTT                  | 17,79 |
| TCACTGGGCGCTATACAGGAACTCGAGGGGC                   | 19,31 |
| TCCCTGTCTGTCGAGCCAGCGACCACTTCTG                   | 19,47 |
| GAGAAAGATGCGGTGGCAGTAGTTGTGATTAG                  | 19,63 |
| CTGGGGGTGATATACCTCACTAAACTCCTTC                   | 19,79 |
| TAATGTGACTAAGCGTTAACTCCAAAGGAAAC                  | 21,31 |
| CAGCTATCCCATATTCGATGTAAGCGGACATC                  | 21,47 |
| TATGCGCCGATATCCGTTCAAACCTAGGGGGC                  | 21,63 |
| TTCTGACCAAAGCTCATGAGAATTGTAACAG                   | 21,79 |
| GAACAGCTTAGAGCAGTCAAGTTCGGATACGC                  | 23,31 |
| TACCTATGGACGGGGATATGCGACACCATGAT                  | 23,47 |
| CCGGATGAGTTATGAAGATCGTCATTGGGATA                  | 23,63 |
| TACAATCTCGAAGTAAAGCATAGCACCCCTGCG                 | 23,79 |
| AAGATAGGGTCACAGCAGTAATACCTCTACCT                  | 25,31 |
| TGTTGGACGTAAGCGTGAATAACGACCAGAA                   | 25,47 |
| AGCACGAGGATTATCACGTGTAACCTCGAAATA                 | 25,63 |
| ATCGTTAGTTTCTCGACTGTTCCGAAACAGGC                  | 25,79 |
| AGCGGTAGCCTCCCACTTAACCTATGCCTTGG                  | 27,31 |
| TAACTGATTTTCTCCTGGTTCGCTAGCTGAT                   | 27,47 |
| CTATGGTCTTAATATAACCCTCGGAGGCAAG                   | 27,63 |
| GGGAGAGGGTGAAACAGGCCACCTGGCTCGGG                  | 27,79 |
| GAGTGCCCCCTCGGCAGCCGCTCGGTTATAC                   | 29,31 |
| TCGTCAAGCCTGCTTCCATAGCTAACCGAT                    | 29,47 |
| TGTGCATTCCACGTGAGTCGTAATAAGCAA                    | 29,63 |
| ACGTGGGAGTGCCGAGCGTCTGAGGTATGGT                   | 29,79 |
| TTACCCACTATGTTGTCTCAAGTGTAACAGT                   | 31,31 |
| ACTAATTATCCATAACTGTGCACGTCAGGGAT                  | 31,47 |
| TCTCACCGGTGGCCGTTGCTACATCAGTTTCT                  | 31,63 |
| TTGCACTCCTGGGAAACTATACTTACGCACT                   | 31,79 |
| GGTTTGGAGGGATTAGGCAATTGCTAGGTTGC                  | 33,31 |
| ATTGTAGGCACAATTTTGTATTGATCACATA                   | 33,47 |
| CATGGGCAATAAAGCTGTAGCCTGAGGCGCGC                  | 33,63 |
| AGCTGCACCGTGTACCTTGATATTGAGGGAC                   | 33,79 |
| ACCTCGTCATTGCGATAAACATACTGAGGGC                   | 35,31 |
| AGTGGGCGAGATCGGCTAATCATTAGTGCTCC                  | 35,47 |
| CTTAGTTAGTTCATAGTTCATTAGGGGCGGAA                  | 35,63 |
| ATGGGCTGGTGCCCCAGTACAGTAACCAACC                   | 35,79 |
| CAACAGTTTAAAGCGTTACAGGCGGTTGAGACTCCATATCCCCATTATA | 0,23  |
| ACCCGAGCGAAAAGGCGACATGAAATAGGACAGCATCAGATCGCGATC  | 0,55  |
| AGCGAATTGCGGCCATATTTCCGCTACTCTGATCAGAAACCGCTCAGC  | 4,23  |
| ATGAAACACGAGATGCGGATACTTTCCGGTTTGGGCTGATGGCTTCAT  | 4,55  |
| GTGGCTGGCCCGAACGCACCGAATATGCTCTCTACTCGAT          | 6,23  |
| GGGTACACACAGCTAACTTTAGGCCCAAGGAG                  | 6,39  |

|                                                   |       |
|---------------------------------------------------|-------|
| CAGAGCCGAGTCTCTACTGAGTAAGTGTGTCACCGTTCCCCGCTGC    | 6,55  |
| AACAGCATCTAGAAATCACGCGAGCTATGTAG                  | 6,71  |
| TATGATTGAGGTCAGGAAGTAAACAACCGTGAGTATGATTGAGCCACT  | 10,23 |
| GAGGGAACGTGGGACGATCCTTCCAACATCTC                  | 10,39 |
| GGCATCACCTAGCTATAACCTGGGTGCGTTGAGTTCGTACCATCCCT   | 10,55 |
| TAGCTCCGACCCTTTTCTTTACGCGCTTGAAC                  | 10,71 |
| TTCTTAAAAAACCTCGTCCAGGTCACCTCCCGGT                | 12,23 |
| CTAATATATGCGATCAAGCTGTTCTCCCCGTC                  | 12,39 |
| CACCAGAATGGGTAAGACACTGACTTCCAGT                   | 12,55 |
| CCAAGTCAAGTTTGGTCATCCGGTACTTCG                    | 12,71 |
| AGCTTGGGATAGCCAGATAATAGTAGGATATGGGCGCATATGAGCTTT  | 14,23 |
| CGTTTGTCCAACCAAAAAGATGTTCTTATGCTATCACATTAGAATATGG | 14,55 |
| ATTACCGTGAAGCGTAGTATTAGCAAAAAGCCC                 | 16,23 |
| CGCACGGCCACCCCGCCAGTGAGCTCGACA                    | 16,39 |
| CGAGTCGTTTCAGTCGTTAGCCCGGGTTCCGGT                 | 16,55 |
| ATCGACTATCGTTCGATCTTTCTCGTATATCA                  | 16,71 |
| GAACTTGAGAAGGAGTAAACAGTCCGGAAGGAC                 | 18,23 |
| GTCGCTGGGCGTATCCGGGCACTCAAAGCAGG                  | 18,39 |
| TGACGATCCAGAAGTGCCCGGAGTAGACGTGC                  | 18,55 |
| TTAGTGAGTATCCAAAATGCACATCGGGCAC                   | 18,71 |
| AGTTTCTCTGTTTACGCGGGCCGCTGACAGACATCTTTTGGGGTTCGT  | 20,23 |
| CTTACATCGCCCTCGCTACCCTAGGAGAAA                    | 20,39 |
| AACTACTGGATGTCCGCCAGCCGCGCGCAGGGCTCGACGGTTAATTTG  | 20,55 |
| AATTCTCATAATCACGACCATAGTGTTCAC                    | 20,71 |
| TGGAGTTACGCAGGGTGAGTCGGCGGGGATGA                  | 22,23 |
| GTCGCATAGTTTCTTCTATCTTACGCTTAC                    | 22,39 |
| GTTTGAACATCATGGTAAAGACTGTGCGAGAT                  | 22,55 |
| GCTATGCTGCCCCCTACTCGTGCTTCGAGAAA                  | 22,71 |
| GTATTACTACCATACCAGATTGTAAGTCTA                    | 24,23 |
| AGCTATGGAGGTAGAGGACGAGGTGCCGATCTCGCCCACTCTATGAAC  | 24,39 |
| GGTACACGATCGGGTTCATAGGTATTCATAAC                  | 24,55 |
| TCAGACGCTATTTTCGATAACTAAGTGGGGCACCCAGCCATATCCGAAT | 24,71 |
| TAGGTTAAGCCTGTTTGGTCAGAAAACGCTTAG                 | 26,23 |
| GTTATTTCCCAAGGCATCCAAACCAAATTGTGCCTACAATAGCTTTAT  | 26,39 |
| CGAGGGTTTTCTGGTCGATAGCTGGGATATCG                  | 26,55 |
| CGGAACAGCTTGCCCTGCCCATGGTGACACGGTGCAGCTCTAATCCC   | 26,71 |
| GAGGCGGCCCCGAGCCCCCAAGGTATAGCG                    | 28,23 |
| GCGGAACCGTATAACCGTGGGTAAGTTATGGATAATTAGTACGGCCAC  | 28,39 |
| AGTACGACATCAGCTAGACAGGGACCACCGCA                  | 28,55 |
| AGGTGGCCTTGCTTTACGGTGAGATTCCCCAGGAGTGCAAACAACATA  | 28,71 |
| CGTGACAGCCCTCAGTATGGTTTGTGCGTATCCCACGTTGCCGAGG    | 30,39 |
| AGTATAGTTTCCGCCCCAATGAAATCCCTGACTTGACGATCACGTGG   | 30,71 |
| CGAATCAAACCTGTTAGCACTTGAGGTCCCTCACCTCTCCCGTGGGAGG | 32,39 |
| ATATCAAGAGAACTGATGTAGCATATGTGATATCAGTTAATATTAAG   | 32,71 |
| AATGATTAGCAACCTAGCAATTGCGGTTGGTTCTAACGATGCTGTGAC  | 34,39 |
| ACTGTACGGCGCGCTCAGGCTACGGAGCACTGTCCAACATGATAATC   | 34,71 |

## S3.6 ZX-32H×64B-cross-channel crystal sequences

|                                                |       |
|------------------------------------------------|-------|
| CCAGGTTAAGTGGCTC                               | 1,47  |
| AATCATACTACGGTTAACTGTTGTGTCTAT                 | 1,63  |
| GTTTACTTAGGGATGG                               | 4,32  |
| TACGAACTCAACGCACGCTCGGGTAGTCTCAA               | 5,47  |
| GAAGATAGAGAGCATAAAATTCGCTAAACCGGA              | 5,63  |
| AAAGTATCCGCATCTCACTAGTATCGAGTA                 | 7,47  |
| TTCATGTCGCCTTTTC                               | 7,63  |
| GAACGGTGACACACTT                               | 10,48 |
| GTGTTCAATTCAGAGTAGCGGAAATATGGCCGC              | 11,47 |
| TTCGGTGCAGCGGGCCGCTGTAACGCTTA                  | 11,63 |
| ATCAGCCCGGGCTTTTGTAAATACGCTGAGCG               | 13,31 |
| ATGCTGTTGTGCGGGTTTCTGAACCGGAAC                 | 13,47 |
| CCGGGCTAATGAAGCCGTGACCCAGAGACTG                | 13,63 |
| TCTGATGCACCGGGAGCCAGCCACTTAGCTGT               | 13,79 |
| GTCAGTGTGATCGCGAGTTCCTCTAGCTAGG                | 15,31 |
| GTGATGCCAAAAGGGTGGATATGGAGCTGGAA               | 15,47 |
| CGGCTCTGATTCTAGTGACCTGGTATAATGG                | 15,63 |
| CGGAGCTACCTGACCTCAATCATACTGCCAC                | 15,79 |
| GGAAGGATTATCCCTTTAAGAATGATCGCA                 | 17,31 |
| CAGTCTTTGAGATGTTGAACATCTTTTGGTTG               | 17,47 |
| GCGTAAAGATCTCGATTCTGGTGCCAAAAC                 | 17,63 |
| GCCGACTCGTTCAAGCACTATTATCTGGCTAT               | 17,79 |
| AAAAGATGTCTGTCAGCCAAAGCTTAGCATAA               | 19,31 |
| GCGGCTGGACGACCCCGCGTGCACGACTGA                 | 19,47 |
| CCGTCGAGCCCTGCGGACAAAACGCATATCCT               | 19,63 |
| CGGCCCGCCAAATTAATAGTGCATTACGCTTC               | 19,79 |
| GCCTAAAGGTCTTCCACGGTAAATCGGGGGTG               | 21,31 |
| ACTCCGGCCTCCTTGGTATATTAGCTTACCCA               | 21,47 |
| CTCGCGTGGCAGCTTACGACTCGTCGAACGA                | 21,63 |
| GGACTGTTCTACATAGTGACTTGGACGAGGTT               | 21,79 |
| TCACTGGGCGCTATACAGGAAACTCGAGGGGC               | 23,31 |
| TCCCTGTCTGTCGAGCCAGCGACCACTTCTG                | 23,47 |
| GAGAAAGATGCGGTGGCAGTAGTTGTGATTAG               | 23,63 |
| CTTGGGGGTGATATACCTCACTAAACTCCTTC               | 23,79 |
| TAATGTGACTAAGCGTTAACTCCAAAGGAAAC               | 25,31 |
| CAGCTATCCCATATTCGATGTAAGCGGACATC               | 25,47 |
| TATGCGCCGATATCCGTTCAAACCTAGGGGGC               | 25,63 |
| TTCTGACCAAAGCTCATGAGAATTGTAAACAG               | 25,79 |
| GAACAGCTTAGAGCAGTCAAGTTCGGATACGC               | 27,31 |
| TACCTATGGACGGGATATGCGACACCATGAT                | 27,47 |
| CCGGATGAGTTATGAAGATCGTCATTGGGATA               | 27,63 |
| TACAATCTCGAAGTAAAGCATAGCACCCCTGCG              | 27,79 |
| AAGATAGGGTCACAGCAGTAATACCTCTACCT               | 29,31 |
| TGTTGGACGTAAGCGTGAAATAACGACCAGAA               | 29,47 |
| AGCACGAGGATTATCACGTGTACCTCGAAATA               | 29,63 |
| ATCGTTAGTTTCTCGACTGTTCCGAAACAGGC               | 29,79 |
| AGCGGTAGCCTCCCACTTAACCTATGCCTTGG               | 31,31 |
| TAAGTATTTCTCCTGGTTCGGCTAGCTGAT                 | 31,47 |
| CTATGGTCTTAATATAACCCTCGGAGGCAAG                | 31,63 |
| GGGAGAGGGTGAAACAGGCCACCTGGCTCGGG               | 31,79 |
| GAGTGCCCCCTCGGCAGCCCTCGGTTATAC                 | 33,31 |
| TCGTCAAGCCTGCTTTCCATAGCTAACCCGAT               | 33,47 |
| TGTGCATTCCACGTGAGTCGTAATAAGCAA                 | 33,63 |
| ACGTGGGAGTGCCCGAGCGTCTGAGGTATGGT               | 33,79 |
| TTACCCACTATGTTGTCTCAAGTGCTAACAGT               | 35,31 |
| ACTAATTATCCATAACTGTGCACGTCAAGGAT               | 35,47 |
| TCTCACCGGTGGCCGTTGCTACATCAGTTTCT               | 35,63 |
| TTGCACTCCTGGGAAACTATACTTACGCACT                | 35,79 |
| CAACAGTTTTGAGACTACCCGAGCTTTTTTTTTTTTACTCTGA    | 0,55  |
| TTTTTTTTTATAGGACAGCACCGAATTTTTTTTT             | 0,71  |
| TTTTTTTTTGAGCCACT                              | 1,24  |
| AGCGAATTCATCCCTAAGTAAACTTTTTTTTTTTTTTTGAGATGCG | 4,55  |
| TTTTTTTTTCCGGTTTGACATGAATTTTTTTTT              | 4,71  |
| TTTTTTTTTGTCGTTG                               | 5,24  |
| CACTGAGTTTTTTTTATCCTTCCAACATCTC                | 6,39  |
| ACAGGCGGTACTCGATAGTTCGTATATGCTCTCTAICTTTTTTTTT | 6,55  |

|                                                    |       |
|----------------------------------------------------|-------|
| TTTTTTTTTAAGCGTCTTTACGCGCTTGAAC                    | 6,71  |
| ATTTCCGCTTTTTTTGGGCTGATCCCGCAAC                    | 10,39 |
| CACCGTTCGCGGCCATTAACCTGGAACCGTGAGTATGATTTTTTTTTT   | 10,55 |
| TTTTTTTTAAGTGTGTAGCCCGGCTCCCGGT                    | 10,71 |
| GTATTAGCATAGCCAGATAATAGTCAGTCTCTTCTTCTCGTATATCA    | 12,23 |
| AGATGTTCCGCTCAGCCCCAGTGAGCTCGACA                   | 12,39 |
| GGGGTCAACCAACCAAAATGAACACCCCGCTGC                  | 12,55 |
| GAGGGAACACAGCTAAGTGGCTGGCCATTATACACGCGAGCTATGTAG   | 14,23 |
| CCAGGTCAGTTCGGTTCAGAAACCTAGCTACTTTAGGCCCAAGGAG     | 14,55 |
| TTCTTAAAGTGGGACGTATGATTGAGTTTTGGCTCGACGGTTAATTG    | 16,23 |
| CCATATCCTGCGATCACATCTTTTGGGGTCGT                   | 16,39 |
| CACCAGAATTCCAGCTGATACTTTGAAAAGGC                   | 16,55 |
| AGTTTCCTGAAGCGTAGAGTCGGCGGGGATGA                   | 18,23 |
| CGCACGGCGCCCCTCGCCTATCTACGCTTAC                    | 18,39 |
| AACTACTGTCAGTCGTAAGACTGTGCGAGAT                    | 18,55 |
| ATCGACTACTAATCACCTCGTGTTCGAGAAA                    | 18,71 |
| AGCTTGGGAACCTCGTTAGCTCCGTCGCGATCACACTGACACCCTTT    | 20,23 |
| CTAATATATTATGCTAAGCTGTTCTCCCGTC                    | 20,39 |
| CGTTTGTCTGGTAAAGGGCATACCTAGAAAATCAGAGCCGAGGTCAGG   | 20,55 |
| CCAAGTCAAGGATATGTCATCCGGTTACTTCG                   | 20,71 |
| ATTACCGTGAAGGAGTGCATCAGAAAAAGCCC                   | 22,23 |
| GTCGCTGGCACCCCGTCACATTAGAATATGG                    | 22,39 |
| CGAGTCGTCAGAAGTGAACAGCATGGCTTCAT                   | 22,55 |
| TTAGTGAGTCGTTTCGAGGCGCATATGAGCTT                   | 22,71 |
| TGGAGTTAGCCTGTTTCCCCAAGGTATAGCG                    | 24,23 |
| GTTATTTTCGTTTCCCTTGTGGGTAAGTTATGGATAATTAGTACGGCCAC | 24,39 |
| GTTTGAACCTCTGGTCGACAGGGACCACCGCA                   | 24,55 |
| CGGAACAGGCCCTACGGTGAGATTCCCAGGAGTGCAAACAACATA      | 24,71 |
| GAACCTGACTGTTTACAACAGTCCGGAAGGAC                   | 26,23 |
| CTTACATCGCGTATCCGGGCACTCAAAGCAGGCTTGACGATCACGTGG   | 26,39 |
| TGACGATCGATGTCCGGCCGAGTAGACGTGC                    | 26,55 |
| AATTCTCATATCCAAAATGCACATCGGGCACTCCACGTTGCCGAGG     | 26,71 |
| GTATTACTCGCAGGGTGCGGGCCGCTGACAGA                   | 28,23 |
| GTCGCATAAGGTAGAGCTACCGCTAGGAGAAAATCAGTTAATATTAAG   | 28,39 |
| GGTACACGATCATGGTCCAGCCGCGCGCAGGG                   | 28,55 |
| GCTATGCTTATTTGAGACCATAGTGTTCACCTCTCCCGTGGGAGG      | 28,71 |
| GCGGAACCACTGTTAGCACTTGAGCCCGAGCCCTAACGATGCTGTGAC   | 30,39 |
| AGGTGGCCAGAACTGATGTAGCAATCAGCTAGTCCAACATGATAATC    | 30,71 |
| AGCTATGGCCAAGGCATAGGTTAAACCATACCAGATTGTACTGCTCTA   | 32,39 |
| TCAGACGCCTTGCCCTCCGAGGGTTATCGGGTTCATAGGTATTCATAAC  | 32,71 |
| CGTGCACAGTATAACCGAGGCGGCAGTGCCTAGGTCAGAAACGCTTAG   | 34,39 |
| AGTATAGTTTGCTTTAAGTACGACATCCCTGAGATAGCTGGGATATCG   | 34,71 |



## S3.7 ZX-6H×6H×64B-pore crystal sequences

|                                                   |       |
|---------------------------------------------------|-------|
| CCAGGTTAAGTGGCTCAATCATACTCACGGTT                  | 1,31  |
| AACTGTTGTGCCTATGTTACTTAGGGATGG                    | 1,47  |
| TACGAACTCAACGCACGCTCGGGTAGTCTCAAGAAGATAGAGAGCATA  | 1,79  |
| AATTCGCTAAACCGGAAAAGTATCCGCATCTC                  | 3,47  |
| ACTCAGTGATCGAGTATTATGTCGCCTTTTC                   | 3,63  |
| GAACGGTGACACACTTGTGTTCAATCAGAGTA                  | 5,31  |
| GCGGAAATATGGCCGCTTCGGTGCGCAGCGGG                  | 5,47  |
| CCGCTGTAAACGTTAATCAGCCCGGGCTTTTGCTAATACGCTGAGCG   | 5,63  |
| ATGCTGTTGTTGCGGGGTTTCTGAACCGGAAC                  | 5,79  |
| CCGGGCTAATGAAGCCGTGACCCAGAGACTGTCTGATGCACCGGGAG   | 7,31  |
| CCAGCCACTTAGCTGTGTCAGTGTGATCGCGA                  | 7,47  |
| GTTCCCTCTAGCTAGGGTGATGCCAAAAGGGT                  | 7,63  |
| GGATATGGAGCTGGAACGGCTCTGATTTCTAG                  | 9,47  |
| TGACCTGGTATAATGGCGGAGCTACCTGACCT                  | 9,63  |
| CAATCATACTGCCACGGAAGGATTATCCCC                    | 11,31 |
| TTAAGAATGATCGCACAGTCTTTGAGATGTT                   | 11,47 |
| GAACATCTTTGGTTGGCGTAAAGATCTCGCA                   | 11,63 |
| TTCTGGTGCCAAAAGTCCGACTCGTTCAAGCACTATTATCTGGCTAT   | 11,79 |
| AAAAGATGTCTGTACGCCAAAGCTTAGCATAA                  | 13,31 |
| GCGGCTGGACGACCCCGCCGTGCGACGACTGA                  | 13,47 |
| CCGTCGAGCCCTGCGCGACAAACGCATATCCTCGCCCGCCAAATTA    | 13,79 |
| TAGTCGATTACGCTTCGCCTAAAGGTCCTTCC                  | 15,47 |
| ACGGTAATCGGGGGTACTCCGGCCTCCTTGG                   | 15,63 |
| TATATTAGCTTACCCACTCGCGTGGCAGCTCT                  | 17,31 |
| ACGACTCGTGAACGAGGACTGTTCTACATAG                   | 17,47 |
| TGACTTGGACGAGGTTTACTGGGCGTATACAGGAACTCGAGGGGC     | 17,63 |
| TCCCTGTCTGTGAGCCAGCGACCACTTCTG                    | 17,79 |
| GAGAAAGATGCGGTGGCAGTAGTTGTGATTAGCTTGGGGGTGATATA   | 19,31 |
| CTACTAAACTCCTTCTAATGTGACTAAGCGT                   | 19,47 |
| TAAC TCAAAGGAAACCAGCTATCCCATATTC                  | 19,63 |
| GATGTAAGCGGACATCTATGCGCCCGATATCC                  | 21,47 |
| GTTCAAAGTGGGGGCTTCTGACCAAAGCTCA                   | 21,63 |
| TGAGAATTGTAACAGGAACAGCTTAGAGCAG                   | 23,31 |
| TCAAAGTTCGGATACGCTACCTATGGACGGGGA                 | 23,47 |
| TATGCGACACCATGATCCGGATGAGTTATGAA                  | 23,63 |
| GATCGTCATTGGGATATACAATCTCGAAGTAAAGCATAGCACCCCTGCC | 23,79 |
| AAGATAGGGTCACAGCAGTAATACCTCTACCT                  | 25,31 |
| TGTTGGACGTAAGCGTGAATAACGACCAGAA                   | 25,47 |
| AGCACGAGGATTATACGTGTACCTCGAAATAATCGTTAGTTTCTCGA   | 25,79 |
| CTGTTCCGAAACAGGCAGCGGTAGCCTCCCAC                  | 27,47 |
| TTAACCTATGCCTTGGTAACTGATTTCTCCT                   | 27,63 |
| GGTTCGCTAGCTGATCTATGGTCCTTAATAT                   | 29,31 |
| AACCCTCGGAGGCAAGGGGAGAGGGTGAACA                   | 29,47 |
| GGCCACTGGCTCGGGGAGTGCCCCCTCGGCAGCCGCTCGGTTATAC    | 29,63 |
| TCGTCAAGCCTGCTTTCCATAGCTAACCCGAT                  | 29,79 |
| TGTGCATTCCACGTGAGTCGTAATAAGCAAACGTGGGAGTGCCCGA    | 31,31 |
| GCGTCTGAGGTATGGTTTACCCACTATGTTGT                  | 31,47 |
| CTCAAGTGCTAACAGTACTAATTATCCATAAC                  | 31,63 |
| TGTGCACGTCAGGGATTCTACCGGTGGCCGT                   | 33,47 |
| TGCTACATCAGTTTCTTGTCACTCCTGGGGAA                  | 33,63 |
| ACTATACTTACGCACTGGTTTGGAGGGATTAG                  | 35,31 |
| GCAATTGCTAGGTTGCATTGTAGGCACAATTT                  | 35,47 |
| TTGATTCGATCACATACATGGGCAATAAAGCT                  | 35,63 |
| GTAGCCTGAGGCGCGCAGCTGCACCGTGTACCTTGATATTGAGGGAC   | 35,79 |
| GTATGATTGTTCCGGTTCAGAAACTATGCTCTAGATGTTTCAAGTTTGG | 0,23  |
| CTATCTCCCGCTGCGCACCGAAAACCGTATGATGTTGTGCGATCA     | 0,55  |
| GACATGAACCATCCCTAAGTAAACTTTTTTTTTTTTTTTTTTCCAGCT  | 2,55  |
| TTTTTTTTGAAAAGGCCAGGTCATTTTTTTT                   | 2,71  |
| TTTTTTTTTCCGGTTT                                  | 3,24  |
| ATGAACACCGCTCAGCGTATTAGCAAAAAGCCCGAGGGAACCAGTCTCT | 4,23  |
| GGGCTGATGAGATGCGGATACTTTACTCTGATAGCCCGACAGCTAA    | 4,55  |
| ATCCTTCCCTCCCGGTAACAGCATAAGTGTGTCACCGTTCGCGGCCAT  | 6,23  |
| ACACTGACGGGGATGACTAATATATCGTTCGA                  | 6,39  |
| CTTTACGCTCGCGATCATTCCGCTAAGCGTTACAGGCGGCCCGCAAC   | 6,55  |
| GCATCAGATGCGAGATCCAAGTCAGCTCGACA                  | 6,71  |
| CAGAGCCGTTTTTTTTTTTTTTTTTGAAGCGTA                 | 8,39  |

|                                                   |       |
|---------------------------------------------------|-------|
| GGCATCACCTAGAAATAGCGAATTTACTCGATCACTGAGTTTTTTTTT  | 8,55  |
| TTTTTTTACCCTTTTATACCGTTTTTTTTT                    | 8,71  |
| ATAATAGTGCTTGAACAGTTCGTAGAGCCACTTAACCTGGATAGGACA  | 10,23 |
| AAAGACTGATAGCCAGCATCTTTGGGGTCGT                   | 10,39 |
| TAGCTCCGAACATCTCCAACAGTTTTGAGACTACCCGAGCGTGCGTTG  | 10,55 |
| GAGTCGGCAGGTCAGGCGTTTGTCCGCGAGGG                  | 10,71 |
| AGCTTGGGCAGAAGTGCACCAAGAAGTGGGACG                 | 12,23 |
| AACAGTCCTTATGCTAAATTCTCAGCGTATCC                  | 12,39 |
| GCGGGCCGCTATGTAGTTCTTAAACAACCAA                   | 12,55 |
| GTCGCTGGTTAATTTGGTCGCATATATCCAA                   | 12,71 |
| CGCACGGCTTTTTTTTTTTTTTTTGTATGTCGG                 | 14,39 |
| GCCGGAGTTCAGTCGTCCATATCCCATTATA                   | 14,55 |
| TTTTTTTTCCAAGGAGGTTTGAACTTTTTTTT                  | 14,71 |
| CACGCGAGGCCCTCGGGGTCACGGCTTCAT                    | 16,23 |
| CTTAGGCAGACGTGCTCTTCTCGAAGGAGT                    | 16,39 |
| CCCAGTGAGGAAGGACGTGGCTGGCCTAGCTA                  | 16,55 |
| AGTTTCTGTATAGCGTGGAGTTACTAATCAC                   | 16,71 |
| AGCTGTTCTGTATATCAGACAGGGATGGGTAAG                 | 18,23 |
| TCACATTACTGCTCTAGCGGAACCTTGCCCTC                  | 18,39 |
| TCATCCGGACGCTTAGCGAGTCGTAACCTCGT                  | 18,55 |
| CCCCAAGTTCATAACAGGTGGCCAAAGCAGG                   | 18,71 |
| GGCGCAIATTTTTTTTTTTTTTTTGCCTGTTT                  | 20,39 |
| GATAGCTGGGATATCGATCGACTACACCCCG                   | 20,55 |
| TTTTTTTTGAATATGGTAGGTTAATTTTTTTT                  | 20,71 |
| GCTATGCTTTACTTCGCTCGACGGCTGACAGA                  | 22,23 |
| CATAGGTACGCAGGGTCTATCTTACGCTTAC                   | 22,39 |
| GGTCAGAATCCCGTCCAGCCGCAGGATATG                    | 22,55 |
| AGATTGTATGAGCTTTGGTACACGTGATAATC                  | 22,71 |
| GTATTACTATCGGGTTGACGATCCTGTTTAC                   | 24,23 |
| CCTCTCCCAGGTAGAGAGTATAGTGCAACCTAGCAATTGCTATGTGAT  | 24,39 |
| CTAACGATTGTTTCACGAACTTGAATCATGGT                  | 24,55 |
| AGCTATGGTCGAGAAACGAATCAAGCGCGCCTCAGGCTACAGTGCGTA  | 24,71 |
| GTTATTTCTTTTTTTTTTTTTTTTATCCCTGACGTGCACAAGAACTG   | 26,39 |
| ATCAGTTATCTGGTCTTACATCGCCCCCTA                    | 26,55 |
| TTTTTTTTAGGAGAAAATGTAGCATTTTTTTTT                 | 26,71 |
| GACCATAGGTATAACCAACTACTGCCACCGCA                  | 28,23 |
| CTACCGCTATATTAAGAATGCACAACCATACTCAGACGCACTGTTAG   | 28,39 |
| GGGCACTCGTGGGAGGTTAGTGAGGTTTCCTT                  | 28,55 |
| GAGGCGCTGCCGAGGCACTTGAGTTGCTTTAAGTACGACTCACGTGG   | 28,71 |
| GTGGGTAACATAATCCCTCCAAACCTCGGGCACCTTGACGAATCAGCTA | 30,39 |
| TCCCACGTAGCTTATTGCCCATGACAACATACGAGGGTTCCCGAGCC   | 30,71 |
| CGGTGAGATTTTTTTTT                                 | 32,39 |
| TTTTTTTTGTTATGGATAATTAGTACGGCCACCGGAACAGCCAAGGCA  | 32,71 |
| CCTACAATGTCCCTCAATATCAAGGTGACACGCTCGTGCTGCTGTGAC  | 34,39 |
| GTGCAGCTTTCCCGAGGAGTGCAAAAATTGTGGTCCAACATATTTTGA  | 34,71 |

## S3.8 ZX-96H×64B-cross-tunnel crystal sequences

|                                                    |       |
|----------------------------------------------------|-------|
| CCAGGTTAAGTGGCTCAATCATACTCACGGTT                   | 1,23  |
| AACTGTTGTGTCCTATGTTACTTAGGGATGG                    | 1,39  |
| TACGAACTCAACGCACGCTCGGGTAGTCTCAA                   | 1,55  |
| GAAGATAGAGAGCATAAATTCGCTAAACCGGA                   | 1,71  |
| AAAGTATCCGCATCTCACTCAGTGATCGAGTA                   | 3,23  |
| TTCATGTCGCCTTTTCGAACGGTGACACACTT                   | 3,39  |
| GTGTTCAITCAGAGTAGCGGAAATATGGCCGC                   | 3,55  |
| TTCGGTGCGCAGCGGGCCGCTGTAACGCTTA                    | 3,71  |
| ATCAGCCCCGGGCTTTTGCTAATACGCTGAGCG                  | 5,23  |
| ATGCTGTTGTTGCGGGGTTTCTGAACCGGAAC                   | 5,39  |
| CCGGGCTAATGAAGCCGTGACCCAGAGACTG                    | 5,55  |
| TCTGATGCACCGGGAGCCAGCCACTTAGCTGT                   | 5,71  |
| GTCAGTGTGATCGCGAGTTCCTCTAGCTAGG                    | 7,23  |
| GTGATGCCAAAAGGGTGGATATGGAGCTGGAA                   | 7,39  |
| CGGCTCTGATTTCTAGTGACCTGGTATAATGG                   | 7,55  |
| CGGAGCTACCTGACCTCAATCATACTGCCAC                    | 7,71  |
| GGAAGGATTATCCCTTTAAGAATGATCGCA                     | 9,23  |
| CAGTCTTTGAGATGTTGAACATCTTTGGTTG                    | 9,39  |
| GCGTAAAGATCTCGCATTCTGGTGCCAAAAC                    | 9,55  |
| GCCGACTCGTTCAAGCACTATATCTGGCTAT                    | 9,71  |
| AAAAGATGTCGTGACGCCAAGCTTAGCATAA                    | 11,23 |
| GCGGCTGGACGACCCCGCCGTGCGACGACTGA                   | 11,39 |
| CCGTGAGCCCTGCGCGACAAACGCATATCCT                    | 11,55 |
| CGGCCCGCCAAATTAATAGTCGATTACGCTTC                   | 11,71 |
| GCCTAAAGGTCTTCACGGTAATCGGGGGTG                     | 13,23 |
| ACTCCGGCTCCTTGGTATATTAGTACCCA                      | 13,39 |
| CTCGCGTGGCACGTCTACGACTCGTCGAACGA                   | 13,55 |
| GGACTGTTCTACATAGTGACTTGGACGAGGTT                   | 13,71 |
| TCACTGGGCGCTATACAGGAAACTCGAGGGGC                   | 15,23 |
| TCCCTGTCTGTCGAGCCAGCGACCACTTCTG                    | 15,39 |
| GAGAAAGATGCGGTGGCAGTAGTTGTGATTAG                   | 15,55 |
| CTTGGGGGTGATATACCTCACTAAACTCCTTC                   | 15,71 |
| TAATGTGACTAAGCGTAACTCCAAAGGAAAC                    | 17,23 |
| CAGCTATCCATATTCGATGTAAGCGGACATC                    | 17,39 |
| TATGCGCCCGATATCCGTTCAAACCTAGGGGGC                  | 17,55 |
| TCTGACCAAAGCTCATGAGAATGTAAACAG                     | 17,71 |
| GAACAGCTTAGAGCAGTCAAGTTCGGATACGC                   | 19,23 |
| TACCTATGGACGGGATATGCGACACCATGAT                    | 19,39 |
| CCGGATGAGTTATGAAGATCGTCATTGGGATA                   | 19,55 |
| TACAATCTCGAAGTAAAGCATAGCACCCCTGCG                  | 19,71 |
| AAGATAGGGTCACAGCAGTAATACCTTACCT                    | 21,23 |
| TGTTGGACGTAAGCGTGAAATAACGACCAGAA                   | 21,39 |
| AGCACGAGGATTATCACGTGTACCTCGAAATA                   | 21,55 |
| ATCGTTAGTTTCTCGACTGTTCCGAAACAGGC                   | 21,71 |
| AGCGGTAGCCTCCCACTTAACCTATGCCTTGG                   | 23,23 |
| TAACTGATTTTCTCCTGGTCCGCTAGCTGAT                    | 23,39 |
| CTATGGTCTTAATATAACCCTCGGAGGCAAG                    | 23,55 |
| GGGAGAGGGTGAAACAGGCCACCTGGCTCGGG                   | 23,71 |
| GAGTGCCCCCTCGGCAGCCGCCTCGGTATACCTCGTCAAGCCTGCTTT   | 25,39 |
| CCATAGCTAACCCGATTGTGCATTCCACGTGAGTCGTACTTAAAGCAA   | 25,71 |
| ACGTGGGAGTGCCCGAGCGTCTGAGGTATGGTTTACCCACTATGTTGT   | 29,23 |
| CTCAAGTGCTAACAGTACTAATTATCCATAAC                   | 29,39 |
| TGTGCACGTCAGGGATTCTCACCGGTGGCCGTTGTACATCAGTTTCT    | 29,55 |
| TTGCACTCCTGGGGAAACTATACTTACGCACT                   | 29,71 |
| GGTTTGGAGGGATTAG                                   | 31,23 |
| GCAATTGCTIAGGTTGCATTGTAGGCACAATTTTGTATTTCGATCACATA | 31,55 |
| CATGGGCAATAAAGCTGTAGCCTGAGGCGCGC                   | 31,71 |
| AGCTGCACCGTGTAC                                    | 34,8  |
| CTTGATATTGAGGGACACCTCGTCATTCCGGAT                  | 35,23 |
| AAACCATACTGAGGGCAGTGGGCGAGATCGGCTAATCATTAGTGCTCC   | 35,39 |
| CTTAGTTIAGTTCATAGTTTCATTAGGGGCGGAA                 | 35,55 |
| ATGGGCTGGTGCCCCACGTACAGTAACCAACC                   | 35,71 |
| GGTGTACCTGTGGGTAGGGCCGAGCGTGGGC                    | 37,23 |
| TTACATGTGCAAGTGAATATATGACTTGGTC                    | 37,39 |
| GACCAGATCTGCTAGAAACCACCAACATCCTC                   | 37,55 |
| CTTGACACCTTCAATTTTAGTAAACACCCA                     | 37,71 |

|                                   |       |
|-----------------------------------|-------|
| ACAGAGCTGAACTTCCCATGGTCGTTCTACTG  | 39,23 |
| TCGTATGATCATAGGATCAAACATAAATACAGC | 39,39 |
| GTACCGCCAGTTCTTGTCTTATTGGCGATCG   | 39,55 |
| TGCATTCCAATGTTTGTATGGCCGCGTGGCTTA | 39,71 |
| TAAAGACGGCCGGTGTAAACCACATAAAGTCGT | 41,23 |
| CCGCCTCCGGTAGTCAACGCGGAACGTAATGG  | 41,39 |
| CAGAAAGTCTATACCCGACAAAAACAGATTTG  | 41,55 |
| TACCGGGGTGAACAGCACGTGCGGCTTCTCCT  | 41,71 |
| GTATCGCCTTGTGTATATACTCTTGCAGGGG   | 43,23 |
| GGTCGAGCGCTCCACTGTAGTGGCCGGCCATC  | 43,39 |
| GTGGACTAGAAAGCGCCGCAATCTGAATATC   | 43,55 |
| GCTACCTCCGATACGCGAACCAGAACCATTTA  | 43,71 |
| AGAGTAGGGGCAGTGCTCAGCCAAACAGTGGG  | 45,23 |
| ACATCTCGGAAAGGTGTCCCAAGTGCAAGTAA  | 45,39 |
| AAAAGGAATTATGAGATCATGTGGGATCCTAA  | 45,55 |
| AGTTTCTGGTAGACCTCGTAGGCTAGAGCGGT  | 45,71 |
| GATATCCACGGTACATTCGTTTACTGCACGGA  | 47,23 |
| ACGAGAGTGCTGGCATAAGCAAGAGAAACCTA  | 47,39 |
| ACTTGGGGACTAAGATCGTTGCGAATTTTCGC  | 47,55 |
| GCGATTTCGATGTAGCCGAACGAGATCGTCCT  | 47,71 |
| AGACGACGGATCTCTGCATGCCGGTAGCACC   | 49,23 |
| GTCAAATATGCGTGCTTTAACGCTTAGACC    | 49,39 |
| CAGCTTGACGCAAGACGCTAATCACTGGGCAG  | 49,55 |
| GGTCTAGGTTGCAGAAACCTACCCCTAAGC    | 49,71 |
| AGCGTAGTAAGGGTTACAAGTTCCTGCGGGCG  | 51,23 |
| CTGTACGAATGAGTCCGGCCTTGACATGACAT  | 51,39 |
| TCTCCACCCGTCCAACACCAGGAGGATGTCG   | 51,55 |
| AGCCCAACTTGACAGTAGTACAGTATCTTT    | 51,71 |
| TTTCATGGCGCGATGTCGCGCTTGTCTCGCG   | 53,23 |
| TGCGTACGGCTTTTATATAGCGTAGACCGGAC  | 53,39 |
| AACCCCGTAAATCGTAAGAGTCGTTATGCCCC  | 53,55 |
| CCGGTTCTGCTAGAGTGGACTGGATCAGATG   | 53,71 |
| TTCAAGTATTCGGTGACCTCCCGCATTACAA   | 55,23 |
| CGCGCTTACCAAGTAACGTATGTACGACGCGA  | 55,39 |
| TGCGAGTGAACGGGTGGATGAATTTTCGTTCCG | 55,55 |
| GGCCAGGCGATCTAAGTCTGGCGCGTGAGGAC  | 55,71 |
| ACGTAAGTTGAAGTAGGAAGCTTTTCTAGCC   | 57,23 |
| ATAGCATCGACACTACGACCTGCTTTTCGACA  | 57,39 |
| CGGACTGCATTCTGGACAGTAACTGCATTAAC  | 57,55 |
| TACGTGCTCCCAACATAAGTGACGTCTCAGC   | 57,71 |
| AGTTGAAAATTATCTCGATAAGCAGAAGGACC  | 59,23 |
| TGTATAACTGGCAAGAGACAAGGCCGCTTCAG  | 59,39 |
| AAAGGATAGCCGGACCGTATTAATGCCGCGCC  | 59,55 |
| AACGGTTCCCGGACCTAGTGTCTATCAAGTC   | 59,71 |
| TAITCTATTTTTTTTTTTTTTTTTGAAACCAT  | 61,23 |
| TCTCGGGTCGAGCGGGTCACTGTTGTGACCTA  | 61,39 |
| CGAGAAGCGTATAGATGTTCCGCGCAATAGC   | 61,55 |
| TCACAGGCTTTTTTTTTTTTTTTGAACTACG   | 63,23 |
| TATGAATTGGTTAAACGCTCCTCGGGAATTA   | 63,39 |
| ATACGACAGGTGGCAAACACCTCCGATGTCA   | 63,55 |
| GCGCCGCATTTTTTTTTTTTTTTACCCATT    | 65,23 |
| CACTGTGAATTTCCACACCGAGGATTCGCAGG  | 65,39 |
| TCCATGGGATTCACCAAGCTCGTATACACCCT  | 65,55 |
| GATTCTCCTTTTTTTTTTTTTTTATGGCAGC   | 67,23 |
| GCTTCGGTACAGGCTGAACTGGTAGATCACC   | 67,39 |
| ATTAGTGTACCCAGCAGTTCGGCTCCCTGTG   | 67,55 |
| GACTCGGGTTTTTTTTTTTTTTTATACCCGG   | 69,23 |
| TCGTCGTGAATGCTGTTCCGGGGTAAATCAA   | 69,39 |
| GCTTTATAAATCCCGACGCTCTGTCCAAC     | 69,55 |
| TTTAGAGCTTTTTTTTTTTTTTTCCGGCCGT   | 71,23 |
| AATCTCGGATTCCTTAAAAACAGGCGCAATC   | 71,39 |
| TCATGGCATAAACGAAACCAATCATAACGAGC  | 71,55 |
| GTGGAGGGTTTTTTTTTTTTTTAAGTTAAT    | 73,23 |
| CTACTGGCGTTTTTCATATATCAGAGACACAG  | 73,39 |
| TAATTCGGAGCCCGGCGTATTATCGCGTCAAT  | 73,55 |
| TCAATATGGTTTTTTTTTTTTTTTACACACCA  | 75,23 |
| GATTACGGCGGCTTAGGGGAATTGAGTACAAG  | 75,39 |
| TGACGAAGAATACCGTCCATCAGATGGAGCTG  | 75,55 |

|                                                  |       |
|--------------------------------------------------|-------|
| TCAGGCTTTTTTTTTTTTTTTTTTCTCCGTCA                 | 77,23 |
| AAATGTTGGCTGAGATTGATTGGTTTAGTGTA                 | 77,39 |
| TAGCGAGTAAGAGATATGTGGGAGGATCATTA                 | 77,55 |
| CAGGATCATTTTTTTTTTTTTTTAAGTTGAC                  | 79,23 |
| TAGCAGAATAATTTGCATCCGAATAAGGTACG                 | 79,39 |
| CAATTAATTTGTACCGAAAACAAGGGCATA                   | 79,55 |
| CAGTAACGAAAAGCGAACGAGCCACCACCTAG                 | 81,23 |
| CACCTCCTGTTAGGGTGACACCCGGGATGGGT                 | 81,39 |
| TGTTTCATCGGTACCCCAGTTTCGCTTGAGG                  | 81,55 |
| AATAGTCCAAGAAATGCATGATAAAAAGTTGTG                | 81,71 |
| CCGCACTGGAATCTGAAGATGCACCGGTTCTC                 | 83,23 |
| GAGACACTCATTACTGCTCGGTAGACCATGT                  | 83,39 |
| CTCCAGTATTGCCATTTTCTAATTAATACTTT                 | 83,55 |
| TAATATAATGTCCGCGATCAGCGAATTCGAC                  | 83,71 |
| ACAAATGGTATCTTTTGAAGCGCACGTAAACCG                | 85,23 |
| CTTGCTGGGCCAATACTTTGTGGTCCACTAT                  | 85,39 |
| ATATAGGCTGACACCCAGTCCCAGGTAAGT                   | 85,55 |
| GCGGAGAGAAATGGCTAATGGTCGACAATATG                 | 85,71 |
| TATTAAGTTTTCGCCGTGAGCGATCAATGACC                 | 87,23 |
| CCAGTAATAGCCTGAACACCCCTGCATCGACGG                | 87,39 |
| CTTCTACCTCTAATGTATAATTCATCTGTG                   | 87,55 |
| CATGGAAGCAGAGTCCCACCGGCAAAATTGA                  | 87,71 |
| GTTACCGCTATAATTAAGAACATTCGGGTTTCG                | 89,23 |
| ACGTGGTCTATGTGATCGCTAGGCTAACCTC                  | 89,39 |
| ATGACTCCAGGAGAGGGTGAGCTCCTACGTGG                 | 89,55 |
| AAGTGTAAATGCCGAGATCTAACTTGATTTTT                 | 89,71 |
| ATTCAGAATCGAGACCTTGCTTTGGACGTCT                  | 91,23 |
| CATTCTATAGCCCGCGTTACTAGGCGCCTTG                  | 91,39 |
| CTCCTACGCTCAATAGTGAACCTTACTATCG                  | 91,55 |
| CGACAGGATAGGTCAAAAATAAACGATACTTAA                | 91,71 |
| AGCTCTAGAGGGGAACCGTAGACTTCACATAA                 | 93,23 |
| AAAACACTCGGCGAGTGTCTAGGGAGCGGGG                  | 93,39 |
| ATGGTACACCCAGCATTCTTCAGTCCGCCTA                  | 93,55 |
| CTCATGATCTTTGATATTCTCCCAAATGGATA                 | 93,71 |
| GGGCGTAAACAAAAAATTCGCTATCGTGCCC                  | 95,23 |
| TCATACAGCATTGTCTACCACCTATGTTCTTA                 | 95,39 |
| TGCTGTAAACATAGATCGTCGGGCGACCTTCG                 | 95,55 |
| TAAGGTGGGGCCGACCACCGACCAAGGCGCTA                 | 95,71 |
| TAGGGTATACTCGTAAGCGATATCTGAATGCG                 | 97,23 |
| TAATACGAAACGACAAAAAATACCTTCGCCGG                 | 97,39 |
| TCCGTCCGTTGGAGCCCACGAACCAACGCATC                 | 97,55 |
| CTTAGTGTCTAGTTTACCATTACCGGAGGCG                  | 97,71 |
| CATTAGGTCTATTATAATGGGACGCCACTACG                 | 99,23 |
| TATCGTTCTATAAAATGGCACTGTCACGGCGC                 | 99,39 |
| CTTTCAGTGTGAGTGTGATGACCTCGCAGCCT                 | 99,55 |
| GGCACAGCTTGGCGATATATCATCTACAATGT                 | 99,71 |
| GTATGATTATAGCCAGATAATAGTTTGAGACTTCATCCGGTACTTCG  | 0,15  |
| ACCCGAGCCAACCAAAAGATGTTCAACCGTGAAGCTGTTCTCCCCGTC | 0,47  |
| CACTGAGTTCGGTTTAGCGAATTGCGGCCATGGCGCATATGAGCTTT  | 2,15  |
| ATTTCCGCCATCCCTAAGTAAACTACTCGATTACATTAGAATATGG   | 2,47  |
| GTATTAGTAAGCGTTACAGGCGGCAGTCTTCTTTCTCGTATATCA    | 4,15  |
| GGGGTCACAAGTGTGTACCCGTTCCGCTCAGCCCCAGTGAGCTCGACA | 4,47  |
| GAGGGAACACAGCTAAGTGGCTGGCCATTATACACGCGAGCTATGTAG | 6,15  |
| CCAGGTCAGTTCGGTTTCAGAAACCTAGCTACTTTAGGCCCAAGGAG  | 6,47  |
| TTCTTAAAGTGGGACGTATGATTGAGTTTTGGCTCGACGGTTAATTTG | 8,15  |
| CACCAGAATTCAGCTCCATATCCTGCGATCACATCTTTTGGGGTCGT  | 8,47  |
| GAACTTGAGAAGCGTAGAGTCGGCGGGGATGAATCCTTCCAACATCTC | 10,15 |
| CGCACGGCGCGTATCCTCCCACGTACTGTTAG                 | 10,31 |
| TGACGATCTCAGTCGTAAGACTGTGCGAGATCTTTACGCGCTTGAAC  | 10,47 |
| ATCGACTATATCCCAACGTGCACATTTCCCCAG                | 10,63 |
| AGCTTGGGAACCTCGTTAGCTCCGTCGCGATCACACTGACACCCTTTT | 12,15 |
| CTAATATAATTATGCTA                                | 12,31 |
| CGTTTGTCTGGGTAAGGGCATCACCTAGAAATCAGAGCCGAGGTCAGG | 12,47 |
| CCAAGTCAAGGATATG                                 | 12,63 |
| GCCGGAGTAGACGTGC                                 | 13,32 |
| AACAGTCCGGAAGGAC                                 | 13,64 |
| ATTACCGTGAAGGAGTGCATCAGAAAAAGCCCGGGCTGATCCCGCAAC | 14,15 |
| GTCGCTGGCACCCCGGAGGCGGCTGCCGAGG                  | 14,31 |

|                                                   |       |
|---------------------------------------------------|-------|
| CGAGTCGTCAGAAGTGAACAGCATGGCTTCATTAGCCCGGCTCCCGGT  | 14,47 |
| TTAGTGAGTCGTTTCGAAATGCAACAATCGGGTT                | 14,63 |
| AGTTTCCTCTGTTTACGCACCGAAGAGATGCGGATACTTTGAAAAGGC  | 16,15 |
| CTTACATCGCCCCTCGCTACCGCTAGGAGAAA                  | 16,31 |
| AACTACTGGATGTCCGGACATGAATACTCTGAATGAACACCCCGCTGC  | 16,47 |
| AATTCTACTAATCAGCACCATAGTGTTCAC                    | 16,63 |
| TGGAGTTACGCAGGGTCTATCTTCGAGCCACTTAAACCTGGATAGGACA | 18,15 |
| GTCGCATAGTTTCCTTCTATCTTACGCTTAC                   | 18,31 |
| GTTTGAACATCATGGTCAACAGTTGTGCGTTGAGTTTCGTATATGCTCT | 18,47 |
| GCTATGCTGCCCTACTCGTGCTTCGAGAAA                    | 18,63 |
| GTATTACTAGTGCCTAAGATTGTACTGCTCTA                  | 20,15 |
| TAATTAGTAGGTAGAGAGCTCTGTTCCTATGA                  | 20,31 |
| GGTACACGGTTATGGACATAGGTATTCATAAC                  | 20,47 |
| AGTATAGTTATTTTCGAGCGGGTACCAAACATT                 | 20,63 |
| TAGGTTAAGCCTGTTTGGTCAGAAAACGCTTAG                 | 22,15 |
| GTTATTTCCAAGGCAGGTACACCTCACTTGC                   | 22,31 |
| CGAGGGTTTTCTGGTCGATAGCTGGGATATCG                  | 22,47 |
| CGGAACAGCTTGCCTCATCTGGTCATTGAAAG                  | 22,63 |
| CTTGACGACCCGAGCCCCCAAGGTATAGCG                    | 24,15 |
| GCGGAACCAAAAGCAGGATATCAAGGCCCTCAG                 | 24,31 |
| AGTACGACATCAGCTAGACAGGGACCACCGCA                  | 24,47 |
| AGGTGGCCTTGCTTATAACTAAGTGGGGCAC                   | 24,63 |
| TCAGACGCAGAACTGGCGGGCCGCTGACAGA                   | 28,15 |
| GTGGGTAAACCATACCTCCAAACCAAATTGTG                  | 28,31 |
| CGGTGAGAACAACATAACCAGCCGCGCGCAGGG                 | 28,47 |
| ATGTAGCAACGGCCACGCAATTGCAGCTTTAT                  | 28,63 |
| CGACCATGGCGCGCCTGAGTGCAATCGGGCAC                  | 30,15 |
| CGAATCAACAGTAGAACGTCGTCTAGCACGCA                  | 30,31 |
| AATAAGGATATGTGATCACTTGAGATCCCTGA                  | 30,47 |
| CAGGCTACCGATCGCCTCAAGCTGTCTGCAAC                  | 30,63 |
| GTGCAGCTGGTTGGTTAGCTATGGGTATAACC                  | 34,15 |
| CGCCCACTGTGACACGCTACTCTCACCTTC                    | 34,31 |
| AATGATTAGCCGATCTGGGCACTCTCACGTGG                  | 34,47 |
| ACTGTACGGGAGCACTTTCCTTTAGGTCTAC                   | 34,63 |
| GACGAGGTTGGGTGTTCTCTCCCGTGGGAGG                   | 36,15 |
| CATATATTATCCGAATGGCGATACAGTGGAGC                  | 36,31 |
| CTAATGAAGACCAAGTATCAGTTAATATAAG                   | 36,47 |
| TACTAAAATCCGCCCTAGTCCACGCGTATCG                   | 36,63 |
| CTCGGCCCTAAGCCACCTAACGATGCTGTGAC                  | 38,15 |
| TAGTTTGAGCCAGCGGTCTTAATGACTACC                    | 38,31 |
| TGGTGGTTGCTGTATTGTCCAACATGATAATC                  | 38,47 |
| GCGGCCATGAGGATGTACTTCTGGCTGTCA                    | 38,63 |
| ATGTGGTTGCTTAGGGGGAATGCAGGAAGTTC                  | 40,15 |
| GCGTTAAAACGACTTTTTTCAACTTCTTGCCA                  | 40,31 |
| TTTTTGTGCGTCTAAATCATAAGACAAGAACT                  | 40,47 |
| GGTAGGTTCAAATCTGTATCCTTTGGTCCGGGAAACCGTTGAGATAAT  | 40,63 |
| AGAGTATAAGGAGAAGGTGTCAAGTACCCACA                  | 42,15 |
| TTCCGCGTCCCCGCAACTTACGTGTAGTGTG                   | 42,31 |
| GATTGCCGCCATTACGACATGTAATCTAGCAG                  | 42,47 |
| CCGCACGTGATATTCAGCAGTCCGATGTTGGGAGCACGTACTACTTCA  | 42,63 |
| TTGGCTGATAAATGGTTCAGCCATGTCCCTCA                  | 44,15 |
| GCCACTACCCCACTGTTACTTGAATTACTTGG                  | 44,31 |
| CCACATGAGATGGCCGTATGGTTTCTATGAAC                  | 44,47 |
| TCTGGTTCTTAGGATCCACTCGCACTTAGATCGCCTGGCCTCACCGAA  | 44,63 |
| GTAACGAACCGCTCT                                   | 46,15 |
| TCGCAACGTTACTTGCACCTGGGATCCGTGCACCATGAAAATAAAAGC  | 46,47 |
| AGCCTACGGCGAAAATACGGGGTACTCTAGCAGAACCGGCATCGCCG   | 46,63 |
| CGGCATGCAGGACGATTGCCATGCTAATCCC                   | 48,15 |
| TCTTGCTTGGTGCTACACTACGCTGGACTCAT                  | 48,31 |
| TGATTAGCTAGGTTTCCCTACAATGCAACCTA                  | 48,47 |
| CTCGTTCGCTGCCAGGTGGGAGATGTCAAGTTGTGGCTTAAACCTT    | 48,63 |
| TGCTTATCAAAGATACCTAGGACCAGGAGATC                  | 50,15 |
| TCAAGGCCGGTCTTCCCCGAGTCCAGCATT                    | 50,31 |
| ATTAATACATGTCATGATTTGACGCTCTTGCG                  | 50,47 |
| TGTAACGCGCGGGCTATAAAGCTTTTTTTT                    | 50,63 |
| GGAACCTGCATCTGATCGAATCGCATGTACCGTGGATATCATGCCAGC  | 52,15 |
| TACGCTATCCGCCGAGGAGAATCAGACCTGT                   | 52,31 |
| TGCTGGTGGTCCGGTCACTCTCGTATCTTAGTCCCCAAGTGTACATG   | 52,47 |

|                                                    |       |
|----------------------------------------------------|-------|
| CCAGTCCCCGACATCCACACTAATTTTTTTTT                   | 52,63 |
| AACGGCGAGTCCTCACCAGAACTGCACTGCC                    | 54,15 |
| TACATACGCGCGAGCATGCGGCGCGTGAAAT                    | 54,31 |
| ACGACTCTTCGCGTCGCGAGATGTTCTCATAA                   | 54,47 |
| GCGCCAGAGGGGCATACCCATGGATTTTTTT                    | 54,63 |
| CGGGGAGGGCTGAGGAGAGGTAGCATAACAAA                   | 56,15 |
| AGCAGGTCTTGTAAATGGCCTGTGATTTAAACC                  | 56,31 |
| AATTCATCTGTGAAAGCTCGACCGCGCTTTC                    | 56,47 |
| CGTCACTTCCGAACGATGTCGTATTTTTTTTT                   | 56,63 |
| AAAGCTTCGACTTGATCCCCGGTAAACACCGGC                  | 58,15 |
| GCCTTGTCGGCTAGAAATAGAATACCCGCTCG                   | 58,31 |
| AGTACTGCTGAAGCGGGAGCGGGGGTATAG                     | 58,47 |
| AGACACTAGTTAATGCGCTTCTCGTTTTTTTT                   | 58,63 |
| CCCCGAAATGGTTCTGATCTGGCAAATTA                      | 60,31 |
| CGCGAACTTGATTTAGTTATACAGGTCCGGC                    | 60,47 |
| TTTTTTTTGCTATTCGAGTAAATGTTTTTTTT                   | 60,63 |
| AACAGTGACGTAGTTCAAGCCTGAATCTCAGC                   | 62,31 |
| GAGGTGGTTAGGTCACGATGCTATTCCAGAAT                   | 62,47 |
| TTTTTTTTGACATCGACTCGCTATTTTTTTT                    | 62,63 |
| GAGGAGCGAATGGGTACCATATGACTAAGCCG                   | 64,31 |
| TACGAGCTTAATCCCTAAGCGCGCACCCGTT                    | 64,47 |
| TTTTTTTTAGGGTGIACCTTCGTCATTTTTTTT                  | 64,63 |
| TCCTCGGTGCTGCCATCCCTCCACATGAAAAC                   | 66,31 |
| AGCCGAACCCTGCGAACGTACGCATACGATTT                   | 66,47 |
| TTTTTTTTCACAAGGGCCGAATTTTTTTTT                     | 66,63 |
| ACCAGTTCCCGGTATGCTCTAAATAAGGAAT                    | 68,31 |
| CAGAGCGTGGTGATCTTCGTACAGTTGGACGG                   | 68,47 |
| TTTTTTTTGTTTGGAAATGCCATGATTTTTTTT                  | 68,63 |
| CTGGTTTTGTCAACTGCGGTAACATCACATA                    | 70,31 |
| TGTTTTCGGATTGCGCCACGACGACGGGAAT                    | 70,47 |
| TTTTTTTTTATGCCCTGGAGTCATCTCGGCAT                   | 70,63 |
| TCTGATATACGGCCGACTTAATATTCAGGCT                    | 72,31 |
| GATTGGGTCTGTGCTCACCGAAGCTGCTGGGT                   | 72,47 |
| TTTTTTTTGCTCGTATGGTAGAAGGAACTCTG                   | 72,63 |
| CAATTCCCAATAAATTACCAATGTTATTGGCC                   | 74,31 |
| GATAATACCTTGTAATTCACAGTGTGGTGAAT                   | 74,47 |
| TTTTTTTTTATTGACGCACCTATATAGCCATTT                  | 74,63 |
| ACCAATCATGGTGTGTCAGTGCGGAGTAAATG                   | 76,31 |
| TCTGATGGTACACTAAAATTCATATGCCACC                    | 76,47 |
| TTTTTTTTCAGCTCCATACTGGAGCGCGGACA                   | 76,63 |
| ATTCGGATTGACGGAGCGTTACTGACCCTAAC                   | 78,31 |
| CTCCCACACGTACCTTACCCGAGAATCTATAC                   | 78,47 |
| TTTTTTTTTAATGATCGATGAACACATTTCTT                   | 78,63 |
| TGGCTCGTAAAAATCA                                   | 80,15 |
| CCTAGGCGCTAGGTGGACCTAATGATTTTATAGAACGATAACACTCAC   | 80,31 |
| GAAAACCTGGAGTTAGTTCTGCTAGTACAAAT                   | 80,47 |
| AGTTAGATCTCAAGCACTGAAAGATCGCCAAGCTGTGCCTATAATAG    | 80,63 |
| GTGCATCTCACAACCT                                   | 82,15 |
| CGGGTGTGAGAACCGATAACCTATTGTCGTTTCGTATTAGGCTCCAA    | 82,31 |
| AATTAGAAACCCATCCCAACATTTTATCTCTT                   | 82,47 |
| TTATCATGAAAGTATTCCGGACGGAAAACCTACAGCACTAAGTTACGAGT | 82,63 |
| GTGCGCTTGTGCAATT                                   | 84,15 |
| TACCGAGCCGGTTTACTTACGCCAGACAATGCTGTATGAATCTATGT    | 84,31 |
| GGGAGCTGACATGGTCCCGTAATCACGGTATT                   | 84,47 |
| CGCTGATCACTTACCTTAACAGCAGGTCCGCCCCACCTTATTTTTTGT   | 84,63 |
| ATCGCTCACATATTGT                                   | 86,15 |
| CCACAAAAGGGTCATTGTAGAGCTACTCGCCGAGTGTTTTATGCTGGG   | 86,31 |
| GAATTATAATAGTGGAGCCAGTAGGCCGGGCT                   | 86,47 |
| CGACCATTACAGGATTTGACCATTATCAAAGATCATGAGGTTCCCT     | 86,63 |
| AATGTTCTTCAATTTT                                   | 88,15 |
| GCAGGGTGGCAACCCGTTCTGAATCGCGGGCTATAGAATGCTATTGAG   | 88,31 |
| GAGCTACCCGTCGATCCGAGATTTTCGTTA                     | 88,47 |
| GCCGATGGCCACGTAGCGTAGGAGTTGACCTATCTGTCCGGTCTCGA    | 88,63 |
| CTAGTAACCGTAGTGGCGTCCCATTTAAGTATTAACACTTTAATTATA   | 90,31 |
| CGTTTATTAGGCTGCGAGGTCATCCAAGGCGGACACGTCCTCTCCT     | 90,63 |
| CCTAGAACAGACAGCTCCAAGAGCAATATCCATTCTTCCATGCGGGCAAA | 92,31 |
| TGGGAGAACGATAGTAAAGGTTTACCCCGCTCATTACTGGCATTAAAGA  | 92,63 |
| TAGGTGGTTTTATGTAAGTCTACGTAGCGCTCTCTCCGCAAAAAGAT    | 94,31 |

|                                                    |       |
|----------------------------------------------------|-------|
| TGGTCGGTTAGGCGGACTGAAGGATAAGAACACAGGCAAGGGTGTCAG   | 94,63 |
| GGTATTTTGGGCACGATAGGCAAGCGCCTCCGTTATATTATCAGATTC   | 96,31 |
| GTAATGGTCGAAGGTCGCCGACGCCGGCGAAAAGTGTCTCAATGGCAA   | 96,63 |
| ACAGTGCCCGCATTTCAGATATCGCACATTGTAGGACTATTTTCGCTTTT | 98,31 |
| GATGATATGATGCGTTGGTTCGTGGCGCCGTGAGGAGGTGGGGTGACC   | 98,63 |



## S3.9 ZX-4H×6H×96B-channel crystal sequences

|                                    |         |
|------------------------------------|---------|
| CCAGGTTATTTTTTTTTTTTTTTTATAGTGGCTC | 1, 23   |
| AATCATACTCACGGTTAACTGTTGTGCCTAT    | 1, 39   |
| GTTTACTTAGGGATGGTACGAACTCAACGCAC   | 1, 55   |
| GCTCGGGTAGTCTCAAGAAGATAGAGGCATA    | 1, 71   |
| TTTTTTTTAAATTCGCTAAACCGGATTTTTTTT  | 1, 87   |
| AAAGTATCTTTTTTTTTTTTTTTTCGCATCTC   | 3, 23   |
| ACTCAGTGATCGAGTATTCATGTCGCCTTTTC   | 3, 39   |
| GAACGGTGACACACTTGTGTTTCATTAGAGTA   | 3, 55   |
| GCGAAATATGGCCGCTTCGGTGCAGCGGG      | 3, 71   |
| TTTTTTTTCCGCTGTAACGCTTATTTTTTTT    | 3, 87   |
| ATCAGCCCTTTTTTTTTTTTTTTTGGGCTTTT   | 5, 23   |
| GCTAATACGCTGAGCGATGCTGTTGTTGCGGG   | 5, 39   |
| GTTTCTGAACCGAAACCGGGCTAATGAAGCC    | 5, 55   |
| GTGACCCAGAGACTGTCTGATGCACCGGGAG    | 5, 71   |
| TTTTTTTTCCAGCCACTAGCTGTTTTTTTTT    | 5, 87   |
| GTCAGTGTTTTTTTTTTTTTTTTTGATCGCGA   | 7, 23   |
| GTTCCCTTAGCTAGGGTGATGCCAAAAGGGT    | 7, 39   |
| GGATATGGAGCTGGAACGGCTCTGATTTCTAG   | 7, 55   |
| TGACCTGGTATAATGGCGGAGCTACCTGACCT   | 7, 71   |
| TTTTTTTTCAATCATACTCCCACTTTTTTTTT   | 7, 87   |
| GGAAGGATTCATCCCTTTAAGAATGATCGCA    | 9, 23   |
| CAGTCTTTGAGATGTTGAACATCTTTTGTTG    | 9, 39   |
| GCGTAAAGATCTCGCATTCTGGTGCCAAAAC    | 9, 55   |
| GCCGACTCGTTC AAGCACTATATCTGGCTAT   | 9, 71   |
| AAAAGATGTCTGTGACGCCAAGCTTAGCATAA   | 9, 87   |
| GCGGCTGGACGACCCCGCGTGCAGCACTGA     | 9, 103  |
| CCGTCGAGCCCTGCGCGACAAAACGCATATCCT  | 11, 23  |
| CGGCCCGCAAATTAATAGTCGATTACGCTTC    | 11, 39  |
| GCCTAAAGGTCTTCACCGTAATCGGGGGTG     | 11, 55  |
| ACTCCGGCCTCCTGGTATATTAGCTTACCCA    | 11, 71  |
| CTCGCGTGGCACGTCTACGACTCGTCGAACGA   | 11, 87  |
| GGACTGTTCTACATAGTGACTTGGACGAGGTT   | 11, 103 |
| TCACTGGGCGCTATACAGGAACTCGAGGGGC    | 13, 23  |
| TCCCTGTCTGTGAGCCAGCGACCACTTCTG     | 13, 39  |
| GAGAAAAGATGCGGTGGCAGTAGTTGTGATTAG  | 13, 55  |
| CTTGGGGGTGATATACCTCACTAAACTCCTTC   | 13, 71  |
| TAATGTGACTAAGCGTAACTCCAAAGGAAAC    | 13, 87  |
| CAGCTATCCATATTCGATGTAAGCGGACATC    | 13, 103 |
| TATGCGCCGATATCCGTTCAAACCTAGGGGGC   | 15, 23  |
| TTCTGACCAAAGCTCATGAGAATTGTAACAG    | 15, 39  |
| GAACAGCTTAGAGCAGTCAAGTTCGGATACGC   | 15, 55  |
| TACCTATGGACGGGATATGCGACACCATGAT    | 15, 71  |
| CCGGATGAGTTATGAAGATCGTCATTGGGATA   | 15, 87  |
| TACAATCTCGAAGTAAAGCATAGCACCTGCG    | 15, 103 |
| AAGATAGGGTCACAGCAGTAATACCTCTACCT   | 17, 23  |
| TGTTGGACGTAAGCGTGAAATAACGACCAAGAA  | 17, 39  |
| AGCACGAGGATTATCACGTGTACCTCGAAATA   | 17, 55  |
| ATCGTTAGTTTCTCGACTGTTCCGAAACAGGC   | 17, 71  |
| AGCGGTAGCCTCCCACTAACCTATGCCTTGG    | 17, 87  |
| TAAGTATTTCTCCTGGTTCGGCTAGCTGAT     | 17, 103 |
| CTATGGTCTTAATATAACCCTCGGAGGCAAG    | 19, 23  |
| GGGAGAGGGTGAAACAGGCCACCTGGCTCGGG   | 19, 39  |
| GAGTGCCCCCTCGGCAGCCGCCTCGGTTATAC   | 19, 55  |
| TCGTCAAGCCTGCTTCCATAGCTAACCCGAT    | 19, 71  |
| TGTGCATTCACGTGAGTCGTACTTAAAGCAA    | 19, 87  |
| ACGTGGGAGTGCCCGAGCGTCTGAGGTATGGT   | 19, 103 |
| TTACCCACTATGTTGTCTCAAGTGCTAACAGT   | 21, 23  |
| ACTAATTATCCATAACTGTGCACGTCAGGGAT   | 21, 39  |
| TCTACCCGGTGGCCGTTGCTACATCAGTTTCT   | 21, 55  |
| TTGCACTCCTGGGGAAACTATACTTACGCACT   | 21, 71  |
| GGTTTGGAGGGATTAGGCAATTGCTAGGTTGC   | 21, 87  |
| ATTGTAGGCACAATTTTTGATTCGATCACATA   | 21, 103 |
| CATGGGCAATAAAGCTGTAGCCTGAGGCGCGC   | 23, 23  |
| AGCTGCACCGTGTACCTTGATATTGAGGGAC    | 23, 39  |
| ACCTCGTCATTCGGATAAACCATACTGAGGGC   | 23, 55  |
| AGTGGCGGAGATCGGCTAATCATTAGTGCTCC   | 23, 71  |

|                                                   |         |
|---------------------------------------------------|---------|
| CTTAGTTAGTTCATAGTTCATTAGGGGCGGAA                  | 23, 87  |
| ATGGGCTGGTGCCCCACGTACAGTAACCAACC                  | 23, 103 |
| AGTTCGTAGAAAAGGCGACATGAAGAGCCACTACACTGACCCTAGCTA  | 0, 47   |
| TCCGGTTTCCCCTGCGCACCGAAGTGCGTTGCCATATCCCATTATA    | 0, 79   |
| TAACCTGGAACCGTGA                                  | 1, 16   |
| ATGAACACATAGGACAACAAGTTGAGATGCGGGGCTGATCGCTCAGC   | 2, 47   |
| TAAGCGTTTATGCTCTCTATCTTCTACTCTGATCAGAAACCAGTCTCT  | 2, 79   |
| GATACTTTTACTCGAT                                  | 3, 16   |
| AACAGCATTTCGCGATCCTCGACGGTTAATTG                  | 4, 31   |
| CAGAGCCGCCCGCAACCACTGAGTAAGTGTGTCACCGTTCGCGGCCAT  | 4, 47   |
| GCATCAGACTAGAAATCTTTAGGCCAAGGAG                   | 4, 63   |
| GTGGGACGCTCCCGTATTTCCGCACAGGCGG                   | 4, 79   |
| GGCATCACAAAAGCCCATCCTTCCAACATCTC                  | 6, 31   |
| TAGCCCGGACCCTTTGTATGATTCCATCCCTAAGTAAACTTGAGACT   | 6, 47   |
| TAGCTCCGGGCTTCATCTTTACGCGCTTGAAC                  | 6, 63   |
| ACAGCTAAAGGTCAGGACCCGAGCAGCGAATT                  | 6, 79   |
| TTCTTAAAAACCTCGTCCAAGTCATTATGCTATCATCCGGTTACTTCG  | 8, 15   |
| ATCGACTATGCGATCAGGGCATATGAGCTTT                   | 8, 31   |
| CACCAGAAGAAGCGTAGAGGGAAGTCCAGCT                   | 8, 47   |
| CTAATATAAGTTTTGGAGCTGTTCTCCCCGTC                  | 8, 63   |
| AGCTTGGGTGGGTAAGCCAGGTCATATGATTG                  | 8, 79   |
| CGTTTGTCTCAGTCGTCGCACGGCTCGTTTCGATCACATTAGAATATGG | 10, 15  |
| AGATGTTTCAGGATATGCCAGTGAGCTCGACA                  | 10, 31  |
| ATTACCGTCAACCAAAGTATTAGCGTTCGGT                   | 10, 47  |
| ATAATAGTCACCCCGCTTTTCTCGTATATCA                   | 10, 63  |
| CGAGTCGTATAGCCAGGGGGTCACGTGGCTGG                  | 10, 79  |
| GTTTGAACGATGTCCGAACAGTCCGCGCAGGG                  | 12, 15  |
| GTCGCTGGGCCCCCTAGACCATAGTGTTCAC                   | 12, 31  |
| GAACCTGACAGAAGTGGCGGGCCGGGAAGGAC                  | 12, 47  |
| TTAGTGAGGCGTATCCGGGCACTCAAAGCAGG                  | 12, 63  |
| TGACGATCGAAGGAGTGCCGGAGTAGACGTGCCACGCGAGCTATGTAG  | 12, 79  |
| CTTACATCTATCCCAAATGCACATCGGGCAC                   | 12, 95  |
| AGTTTCTCGCAGGGTCCAGCCGCGGGGATGA                   | 14, 15  |
| AATTCTCAGCCCTCGCCTATCTTACGCTTAC                   | 14, 31  |
| AACTACTGCTGTTTACAAAGACTGTGCGAGAT                  | 14, 47  |
| GTCGATACTAATCACCTCGTTCGAGAAA                      | 14, 63  |
| TGGAGTTAATCATGGTGAGTCGGCTGACAGACATCTTTTGGGGTCTG   | 14, 79  |
| GCTATGCTGTTTCTTCTACCGCTAGGAGAAA                   | 14, 95  |
| GTATTACTACCATAACAGATTGTAGGATATCG                  | 16, 15  |
| AGGTGGCCAGGTAGAGTGCCCATGGTGACACGGTGCAGCTATCCGAAT  | 16, 31  |
| GGTACACGCCCGAGCCGGTCAGAAGTCTCTA                   | 16, 47  |
| AGCTATGGTATTTTCGAGACGAGGTGCCGATCTCGCCACTCTATGAAC  | 16, 63  |
| TAGGTAAATCGGGTTCATAGGTATTCATAAC                   | 16, 79  |
| TCAGACGCCAAAGGCATAACTAAGTGGGGCACCAGCCCATAGCTTTAT  | 16, 95  |
| CGAGGGTTATCAGCTAGATAGCTGGTATAGCG                  | 18, 15  |
| GTTATTTCTTGCCTCGTGGGTAAGTTATGGATAATTAGTACGGCCAC   | 18, 31  |
| GAGGCGGCTTCTGGTCGACAGGGACCACCGCA                  | 18, 47  |
| CGGAACAGGTATAACCCGGTGAGATTCCCCAGGAGTGCAACTAATCCC  | 18, 63  |
| AGTACGACGCCTGTTTCCCCAAGACGCTTAG                   | 18, 79  |
| GCGGAACCTTGCTTTATCCAAACAAATTGTGCCTACAATACAACATA   | 18, 95  |
| CGTGCACAGCGCGCTCAGGCTACTATGTGATTCCCAGTATATTAAG    | 20, 31  |
| AGTATAGTGCCCTCAGTATGGTTTATCCCTGACCTCTCCCTGCCGAGG  | 20, 63  |
| CGAATCAATCCGCCCTAATGAAAGTGCCTACTTGACGATCACGTGG    | 20, 95  |
| ATATCAAGACTGTTAGCACTTGAGGGTGGTTATCAGTTAGCTGTGAC   | 22, 31  |
| AATGATTAAGAAACTGATGTAGCAGTCCCTCAGTCCAACATGATAATC  | 22, 63  |
| ACTGTACGGCAACCTAGCAATTGCGGAGCACTAACGATGTGGGAGG    | 22, 95  |

## S4.1 XY-48H×64B-pore crystal sequences

|                                                 |       |
|-------------------------------------------------|-------|
| CCAGGTTAAGTGGCTCAATCATACTCACGGTT                | 1,23  |
| AACTGTTGTGCTATGTTACTTAGGGATGG                   | 1,39  |
| TACGAACTCAACGCACGCTCGGGTAGTCTCAA                | 1,55  |
| GAAGATAGAGAGCATAAATTCGCTAAACCGGA                | 1,71  |
| AAAGTATCCGCATCTCACTCAGTGATCGAGTA                | 3,23  |
| TTCATGTCGCCTTTTCGAACGGTGACACACTT                | 3,39  |
| GTGTTCAITCAGAGTAGCGGAAAATATGGCCGC               | 3,55  |
| TTCGGTGCGCAGCGGGCCGCTGTAACGCTTA                 | 3,71  |
| ATCAGCCCCGGCTTTTGCTAATACGCTGAGCG                | 5,23  |
| ATGCTGTTGTTGCGGGGTTTCTGAACCGGAAC                | 5,39  |
| CCGGGCTAATGAAGCCGTGACCCAGAGACTG                 | 5,55  |
| TCTGATGCACCGGGAGCCAGCCACTTAGCTGT                | 5,71  |
| GTCAGTGTGATCGCGAGTTCCTCTAGCTAGG                 | 7,23  |
| GTGATGCCAAAAGGGTGATATGGAGCTGGAA                 | 7,39  |
| CGGCTCTGATTTCTAGTGACCTGGTATAATGG                | 7,55  |
| CGGAGCTACCTGACCTCAATCATACTGCCAC                 | 7,71  |
| GGAAGGATTCATCCCTTTAAGAATGATCGCA                 | 9,23  |
| CAGTCTTTGAGATGTTGAACATCTTTGGTTG                 | 9,39  |
| GCGTAAAGATCTCGCATTCTGGTGCCAAAAC                 | 9,55  |
| GCCGACTCGTTCAAGCACTATTATCTGGCTAT                | 9,71  |
| AAAAGATGTCTGTCAGCCAAAGCTTAGCATAA                | 11,23 |
| GCGGCTGGACGACCCCGCCGTGCGACGACTGA                | 11,39 |
| CCGTGAGCCCTGCGCGACAAACGCATATCCT                 | 11,55 |
| CGGCCCGCCAAATTAATAGTCGATTACGCTTC                | 11,71 |
| GCCTAAAGGTCTTCACGGTAATCGGGGGTG                  | 13,23 |
| ACTCCGGCTCCTTGGTATATTAGCTTACCCA                 | 13,39 |
| CTCGCGTGGCACGTCTACGACTCGTCGAACGA                | 13,55 |
| GGACTGTTCTACATAGTGACTTGGACGAGGTT                | 13,71 |
| TCACTGGGCGCTATACAGGAAACTCGAGGGGC                | 15,23 |
| TCCCTGTCTGTCGAGCCAGCGACCACTTCTG                 | 15,39 |
| GAGAAAGATGCGGTGGCAGTAGTTGTGATTAG                | 15,55 |
| CTTGGGGGTGATATACCTCACTAAACTCCTTC                | 15,71 |
| TAATGTGACTAAGCGTAACTCCAAAGGAAAC                 | 17,23 |
| CAGCTATCCATATTCGATGTAAGCGGACATC                 | 17,39 |
| TATGCGCCCGATATCCGTTCAAACCTAGGGGGC               | 17,55 |
| TTCTGACCAAAGCTCATGAGAATGTAAACAG                 | 17,71 |
| GAACAGCTTAGAGCAGTCAAGTTCGGATACGC                | 19,23 |
| TACCTATGGACGGGATATGCGACACCATGAT                 | 19,39 |
| CCGGATGAGTTATGAAGATCGTCATTGGGATA                | 19,55 |
| TACAATCTCGAAGTAAAGCATAGCACCCCTGCG               | 19,71 |
| AAGATAGGGTCACAGCAGTAATACCTTACCT                 | 21,23 |
| TGTTGGACGTAAGCGTGAAATAACGACCAGAA                | 21,39 |
| AGCACGAGGATTATCACGTGTACCTCGAAATA                | 21,55 |
| ATCGTTAGTTTCTCGACTGTTCCGAAACAGGC                | 21,71 |
| AGCGGTAGCCTCCCACTTAACCTATGCCTTGG                | 23,23 |
| TAACTGATTTTCTCCTGGTCCGCTAGCTGAT                 | 23,39 |
| CTATGGTCTTAATATAACCCTCGGAGGCAAG                 | 23,55 |
| GGGAGAGGGTGAAACAGGCCACCTGGCTCGGG                | 23,71 |
| GAGTGCCCCCTCGGCAGCCGCCTCGGTTATAC                | 25,23 |
| TCGTCAAGCCTGCTTTCCATAGCTAACCCGAT                | 25,39 |
| TGTGCATTCCACGTGAGTCGTAATAAGCAA                  | 25,55 |
| ACGTGGGAGTGCCCCGAGCGTCTGAGGTATGGT               | 25,71 |
| TTACCCACTATGTTGTCTCAAGTGCTAACAGT                | 27,23 |
| ACTAATTATCCATAACTGTGCACGTCAAGGAT                | 27,39 |
| TCTACCCGGTGGCCGTTGCTACATCAGTTTCT                | 27,55 |
| TTGCACTCCTGGGAAAACATACTTACGCACT                 | 27,71 |
| GGTTTGGAGGGATTAGGCAATTGCTAGGTTGC                | 29,23 |
| ATTGTAGGCACAATTTTGATTGATCACATA                  | 29,39 |
| CATGGGCAATAAAGCTGTAGCCTGAGGCGCGC                | 29,55 |
| AGCTGCACCGTGTACCTTGATATTGAGGGAC                 | 29,71 |
| ACCTCGTCATTCGGATAAACCATACTGAGGGC                | 31,23 |
| AGTGGGCGAGATCGGCTAATCATTAGTGCTCC                | 31,39 |
| CTTAGTTAGTTCATAGTTCATTAGGGGCGGAA                | 31,55 |
| ATGGGCTGGTGCCCCACGTACAGTAACCAACC                | 31,71 |
| GGGTACCTGTGGGTAGGGCCGAGCGCTGGGCTTACATGTGCAAGTGA | 33,23 |
| AATATATGACTTGGTCGACCAGATCTGCTAGA                | 33,39 |

|                                                   |       |
|---------------------------------------------------|-------|
| AACCACCAACATCCTCTTGACACCTTTCAATTTTTAGTAAACACCCA   | 33,55 |
| ACAGAGCTGAACTTCCCATGGTCGTCTACTG                   | 33,71 |
| TCGTATGATCATAGGATCAAACATAACAGCGTACCGCCAGTTCTTG    | 35,39 |
| TCCTTATTGGCGATCGTGCATTCCAATGTTTGATGGCCGCGTGGCTTA  | 35,71 |
| TTAAGACGGCCGGTGT                                  | 44,8  |
| AACCACATAAAGTCGTCCGCCTCCGGTAGTCA                  | 45,23 |
| ACGCGGAACGTAATGGCAGAAAGTCTATACCCGACAAAAACAGATTTG  | 45,39 |
| TACCGGGGTGAACAGCACGTGCGGCTTCTCCT                  | 45,55 |
| GTATCGCCTTGTGTATATACTCTTGCGGGGG                   | 45,71 |
| GGTCGAGCGCTCCACT                                  | 47,23 |
| GTAGTGGCCGGCCATCGTGGACTAGAAAGCGCCGGAATCTGAATATC   | 47,55 |
| GTACCTCCGATACGCGAACCCAGAACCATTTA                  | 47,71 |
| AGAGTAGGGGCAGTGCTCAGCCAAACAGTGGGACATCTCGGAAAGGTG  | 49,23 |
| TCCAAGTGCAAGTAAAAAAGGAATTATGAGA                   | 49,39 |
| TCATGTGGGATCCTAAAGTTTCTGGTAGACCTCGTAGGGCTAGAGCGGT | 49,55 |
| GATATCCACGGTACATTCTGTTACTGCACGGA                  | 49,71 |
| ACGAGAGTGCTGGCATAAGCAAGAGAAAACCTAACTTGGGGACTAAGAT | 51,39 |
| CGTTGCGAATTTTCGCGCATTCGCATGTAGCCGAACGAGATCGTCCT   | 51,71 |
| AGACGACGGATCTCCT                                  | 60,8  |
| GCATGCCGGTAGCACCGTCAAATATGCGTGCT                  | 61,23 |
| TTAACGCTTTAGACCCAGCTTGACGCAAGACGCTAATCACTGGGCAG   | 61,39 |
| GGTCTAGGTTGCAGAAAACCTACCCCTAAGC                   | 61,55 |
| AGCGTAGTAAGGGTTACAAGTTCTGCGGCGG                   | 61,71 |
| CTGTACGAATGAGTCC                                  | 63,23 |
| GGCCTTGACATGACATTTCTCCACCCGTCCAACACCAGCAGGATGTGC  | 63,55 |
| AGCCACAACCTGACAGTAGTACAGTATCTTT                   | 63,71 |
| GTAIGATTTTTTTTTTTTTTTTTTTGGACTCAT                 | 0,15  |
| CCATATCCAACCGTGACCCAGTGAGCTCGACA                  | 0,31  |
| ACCGGAGCTTCCAGCTGTGGGAGAATGTCATG                  | 0,47  |
| TATGATTGTTGAGACTCTTTCTCGTATATCA                   | 0,63  |
| TTTTTTTTGTGGGACGTGTGGGCTTTTTTTTT                  | 0,79  |
| CACTGAGTTTTTTTTTTTTTTTTTTGGTGCTAC                 | 2,15  |
| AAGTAACTACTCGATCTTTAGGCCAAAGGAG                   | 2,31  |
| ATTTCCGCCATCCCTGCGTTAAATCTGCAAC                   | 2,47  |
| AGCGAATTGCGGCCATCACGCGAGCTATGTAG                  | 2,63  |
| TTTTTTTTCCGGTTACTACGCTTTTTTTTT                    | 2,79  |
| GTATTAGCTTTTTTTTT                                 | 4,15  |
| GGGGTCACAAGTGTGTACCGTCCGCTCAGCCATCTTTTGGGGTCGT    | 4,47  |
| TTTTTTTTAAGCGTTACAGGCGGCAGTCTCTCGACGGTTAATTG      | 4,79  |
| GAGGGAACTTTTTTTT                                  | 6,15  |
| CCAGGTCAGTCCGGTTCAGAAAACCTAGCTAATCCTTCCAACATCTC   | 6,47  |
| TTTTTTTTACAGCTAAGTGGCTGGCCATTATACTTTACGCGTTGAAC   | 6,79  |
| AGTTTCCTTTTTTTTTTTTTTTTTTCGCGATCACACTGACACCCTTTT  | 8,15  |
| AGATGTTCCGCCCTCGCTACCGCTAGGAGAAA                  | 8,31  |
| AACTACTGCAACAAAGGCATCACCTAGAAATCAGAGCCGAGGTCAGG   | 8,47  |
| ATAATAGTCTAATCACGACCATAGTGTTCAC                   | 8,63  |
| TTTTTTTTATAGCCAGTAGCTCCGTTTTTTTT                  | 8,79  |
| TTCTTAAATTTTTTTTTTTTTTTTTTAAAAGCCGGGCTGATCCCGCAAC | 10,15 |
| CGCACGGCTGCGATCACCTATCTTACGCTTAC                  | 10,31 |
| CACCAGAATCAGTCGTAACAGCATGGCTTCATTAGCCCGGCTCCCGGT  | 10,47 |
| ATCGACTAAGTTTTGGCTCGTGTTCGAGAAA                   | 10,63 |
| TTTTTTTTGAAGCGTAGCATCAGATTTTTTTTT                 | 10,79 |
| AGCTTGGGTTTTTTTTTTTTTTTTTTGAGATGCG                | 12,15 |
| CTAATATATTATGCTAAGCTTCTCCCGTTC                    | 12,31 |
| CGTTGTCTGGGTAAGGACATGAATACTCTGA                   | 12,47 |
| CCAAGTCAAGGATATGTCATCCGGTACTTCG                   | 12,63 |
| TTTTTTTTAACCTCGTGCACCGAATTTTTTTTT                 | 12,79 |
| ATTACCGTTTTTTTTTTTTTTTTTTGAGCCACT                 | 14,15 |
| GTCGCTGGCACCCCGTACATTAGAATATGG                    | 14,31 |
| CGAGTCGTCAGAAGTGAACAGTTGTGCGTTG                   | 14,47 |
| TTAGTGAGTCGTTTCGAGGCGCATATGAGCTTT                 | 14,63 |
| TTTTTTTTGAAGGAGTCTATCTTCTTTTTTTTT                 | 14,79 |
| TGGAGTTATTTTTTTTTTTTTTTTGTATAGCG                  | 16,15 |
| GCGGAACCGTTTTCTTGACGAGGTGCCGATCT                  | 16,31 |
| GTTTGAACATCAGCTAGACAGGGACCACCGCA                  | 16,47 |
| AGTTGGCCGCCCTATAACTAAGTGGGGCAC                    | 16,63 |
| TTTTTTTTCCCGAGCCCCCAAGTTTTTTTT                    | 16,79 |
| GAACCTGATTTTTTTTTTTTTTTTGAAGGAC                   | 18,15 |

|                                                  |       |
|--------------------------------------------------|-------|
| CTTACATCGCGTATCCTCCAACCAAATTGTG                  | 18,31 |
| TGACGATCGATGTCCGGCCGGAGTAGACGTGC                 | 18,47 |
| AATTCTCATATCCCAATGCCCATGGTGACACG                 | 18,63 |
| TTTTTTTCTGTTTACAACAGTCCTTTTTTTT                  | 18,79 |
| GTATTACTTTTTTTTTTTTTTTTCTGACAGA                  | 20,15 |
| GTCGCATAAGGTAGAGGTGGGTAAGTTATGGATAATTAGTACGGCCAC | 20,31 |
| GGTACACGATCATGGTCCAGCCGCGCGCAGGG                 | 20,47 |
| GCTATGCTTATTTGACGGTGAGATTTCCCAGGAGTGCAATTTTTTTTT | 20,63 |
| TTTTTTTTCGCAGGGTGC GGCCGTTTTTTTTT                | 20,79 |
| TAGGTTAATTTTTTTTTTTTTTTGGGGATGA                  | 22,15 |
| GTTATTTCCAAGGCAGGGCACTCAAAGCAGGCTTGACGATCACGTGG  | 22,31 |
| CGAGGGTTTTCTGGTCAAAGACTGTGCGAGAT                 | 22,47 |
| CGGAACAGCTTGCCTCAATGCACATCGGGCACTCCCACGTTTTTTTTT | 22,63 |
| TTTTTTTGCCTGTTGAGTCGGCTTTTTTTTT                  | 22,79 |
| AGCTATGGGCCCTCAGTATGGTTTTTTTTTTTTTTTTTTTGTGGGAGG | 24,31 |
| TCAGACGCTTCCGCCCTAATGAAATCGGGTTATCAGTTAATATAAG   | 24,63 |
| TTTTTTTACCATACCCCTCTCCCTTTTTTTTT                 | 24,79 |
| TTTTTTTTCGCGAGG                                  | 25,0  |
| CGTGCACAGTATAACCGAGGCGGCTTTTTTTTTTTTTTTTGCTGTGAC | 26,31 |
| AGTATAGTTTGCTTTAAGTACGACATCCCTGAGTCCAACATGATAATC | 26,63 |
| TTTTTTTAGTGCGTACTAACGATTTTTTTTTT                 | 26,79 |
| TTTTTTTACAACATA                                  | 27,0  |
| CACTTGAGTTTTTTTTTTTTTTTTCTGCTCTA                 | 28,15 |
| CGAATCAAACCTGTTAGTAGTTTGATCCTATGA                | 28,31 |
| ATGTAGCATATGTGATCATAGGTATTCATAAC                 | 28,47 |
| ATATCAAGAGAACTGGGAATGCACGATCGCC                  | 28,63 |
| TTTTTTTGTCCCTCAAAGATTGATTTTTTTTT                 | 28,79 |
| GCAATTGCTTTTTTTTTTTTTTTTACGCTTAG                 | 30,15 |
| AATGATTAGCAACCTAGGTACACCGACCAAGT                 | 30,31 |
| CAGGCTACGGAGCACTGATAGCTGGGATATCG                 | 30,47 |
| ACTGTACGGCGCGCTTGGTGGTTGGAAGTTC                  | 30,63 |
| TTTTTTTGGTTGGTTGGTTCAGAATTTTTTTTT                | 30,79 |
| CTCGGCCCTTTTTTTTTTTTTTTTATCCGAAT                 | 32,15 |
| ACATGTAAGCCAGCGGCTCGACCGCGCTTTC                  | 32,31 |
| GTGTCAAGTCACTTGCCGCCCACTCTATGAAC                 | 32,47 |
| TACTAAAAATTGAAAGGCCACTACGCGTATCG                 | 32,63 |
| TTTTTTTGGGTGTTCAAGCCATTTTTTTTTT                  | 32,79 |
| GGCGGTACTTTTTTTTTTTTTTTTCTAATCCC                 | 34,15 |
| ATCTGGTCCAAGAACTATGGTTCATTACG                    | 34,31 |
| GCGGCCATTCTAGCAGCCTACAATAGCTTTAT                 | 34,47 |
| CGACCATGTAAGCCACCCCGTAATACACAA                   | 34,63 |
| TTTTTTTTCAGTAGAAGTGCAGCTTTTTTTTTT                | 34,79 |
| CGTCTTAATTTTTTTTTTTTTTTTGTGCTGATT                | 44,15 |
| ACTTCTGACACCGGCTCTTGCTTATGCCAGC                  | 44,31 |
| TTTTTGTCCGGTATAGTCATACGACAAACATT                 | 44,47 |
| AGAGTATACAAATCTGCGAATCGCGCGAAAAT                 | 44,63 |
| TTTTTTTCCCCCGCAAATAAGGATTTTTTTTT                 | 44,79 |
| GGAGGCGGTTTTTTTTTTTTTTTACCCACA                   | 46,15 |
| GATTGCCGTGACTACCCCTACTCTTACTTGC                  | 46,31 |
| CCGCACGTGATATCACATATATTGAGGATGT                  | 46,47 |
| TCTGGTTCAGGAGAAGCCACATGAATGTACCG                 | 46,63 |
| TTTTTTTAAATGGTAGCTCTGTTTTTTTTT                   | 46,79 |
| TGGCTGATTTTTTTTTTTTTTTTAGTGGAGC                  | 48,15 |
| CGAGATGTCCCACTGTTCGTACAGTTGGACGG                 | 48,31 |
| CAGAAACTCACCTTTCTAGTCCACGATGGCCG                 | 48,47 |
| AGCTACGAGGTCTACTCAAGGCCTGTCAAGT                  | 48,63 |
| TTTTTTTACCCTCTGAGGTAGCTTTTTTTTTT                 | 48,79 |
| CCCCAAGTTTTTTTTTTTTTTTACGACTTT                   | 50,15 |
| TTCCTTTTATCTTAGTCGGCATGCGGTCTAAA                 | 50,31 |
| CTCGTTCGTCTCATAATTCGCGTGCTGTTCA                  | 50,47 |
| GTAACGGAAGGACGATCTAGGACCTAACCCCTT                | 50,63 |
| TTTTTTTTCGCTGCAGGCGATACTTTTTTTTT                 | 50,79 |
| CGTCGTCTTTTTTTTTTTTTTTTAGGTTTC                   | 60,15 |
| TCAAGCTGAGGAGATCGATACTTGAAAAGGC                  | 60,31 |
| TGATTAGCGTCTTGCGACTCTCGTGCTACATG                 | 60,47 |
| GGAACCTGTGTCAGATGAACACCCCGCTGC                   | 60,63 |
| TTTTTTTTCGCGCATCGAACGTTTTTTTTT                   | 60,79 |
| TATTTGACTTTTTTTTTTTTTTTTGCCTGCC                  | 62,15 |

TGCTGGTGAGCACGCATAACCTGGATAGGACA  
GGTAGGTTGACATCCAATTGGGATTAGGATC  
TGTACTACGCTTAGGGAGTTCGTATATGCTCT  
TTTTTTTAAAGATACTGGATATCTTTTTTTT

62,31  
62,47  
62,63  
62,79

## S4.2 XY-64H×64B-pore crystal sequences

|                                   |       |
|-----------------------------------|-------|
| CCAGGTTAAGTGGCTCAATCATACTCACGGTT  | 1,23  |
| AACTGTTGTGTCCTATGTTACTTAGGGATGG   | 1,39  |
| TACGAACTCAACGCACGCTCGGGTAGTCTCAA  | 1,55  |
| GAAGATAGAGAGCATAAATTCGCTAAACCGGA  | 1,71  |
| AAAGTATCCGCATCTCACTCAGTGATCGAGTA  | 3,23  |
| TTCATGTCGCCTTTTCGAACGGTGACACACTT  | 3,39  |
| GTGTTCAITCAGAGTAGCGGAAAATATGGCCGC | 3,55  |
| TTCGGTGCGCAGCGGGCCGCTGTAACGCTTA   | 3,71  |
| ATCAGCCCCGGCTTTTGCTAATACGCTGAGCG  | 5,23  |
| ATGCTGTTGTTGCGGGGTTTCTGAACCGGAAC  | 5,39  |
| CCGGGCTAATGAAGCCGTGACCCAGAGACTG   | 5,55  |
| TCTGATGCACCGGGAGCCAGCCACTTAGCTGT  | 5,71  |
| GTCAGTGTGATCGCGAGTTCCTCTAGCTAGG   | 7,23  |
| GTGATGCCAAAAGGGTGATATGGAGCTGGAA   | 7,39  |
| CGGCTCTGATTTCTAGTGACCTGGTATAATGG  | 7,55  |
| CGGAGCTACCTGACCTCAATCATACTGCCAC   | 7,71  |
| GGAAGGATTCATCCCTTTAAGAATGATCGCA   | 9,23  |
| CAGTCTTTGAGATGTTGAACATCTTTGGTTG   | 9,39  |
| GCGTAAAGATCTCGCATTCTGGTGCCAAAAC   | 9,55  |
| GCCGACTCGTTCAAGCACTATTATCTGGCTAT  | 9,71  |
| AAAAGATGTCTGTCAGCCCAAGCTTAGCATAA  | 11,23 |
| GCGGCTGGACGACCCCGCCGTGCGACGACTGA  | 11,39 |
| CCGTGAGCCCTGCGCGACAAACGCATATCCT   | 11,55 |
| CGGCCCGCCAAATTAATAGTCGATTACGCTTC  | 11,71 |
| GCCTAAAGGTCTTCACGGTAATCGGGGGTG    | 13,23 |
| ACTCCGGCTCCTTGGTATATTAGCTTACCCA   | 13,39 |
| CTCGCGTGGCACGTCTACGACTCGTCGAACGA  | 13,55 |
| GGACTGTTCTACATAGTGACTTGGACGAGGTT  | 13,71 |
| TCACTGGGCGCTATACAGGAAACTCGAGGGGC  | 15,23 |
| TCCCTGTCTGTCGAGCCAGCGACCACTTCTG   | 15,39 |
| GAGAAAGATGCGGTGGCAGTAGTTGTGATTAG  | 15,55 |
| CTTGGGGGTGATATACCTCACTAAACTCCTTC  | 15,71 |
| TAATGTGACTAAGCGTAACTCCAAAGGAAAC   | 17,23 |
| CAGCTATCCATATTCGATGTAAGCGGACATC   | 17,39 |
| TATGCGCCCGATATCCGTTCAAACCTAGGGGGC | 17,55 |
| TTCTGACCAAAGCTCATGAGAATTGTAAACAG  | 17,71 |
| GAACAGCTTAGAGCAGTCAAGTTCGGATACGC  | 19,23 |
| TACCTATGGACGGGATATGCGACACCATGAT   | 19,39 |
| CCGGATGAGTTATGAAGATCGTCATTGGGATA  | 19,55 |
| TACAATCTCGAAGTAAAGCATAGCACCCCTGCG | 19,71 |
| AAGATAGGGTCACAGCAGTAATACCTTACCT   | 21,23 |
| TGTTGGACGTAAGCGTGAAATAACGACCAGAA  | 21,39 |
| AGCACGAGGATTATCACGTGTACCTCGAAATA  | 21,55 |
| ATCGTTAGTTTCTCGACTGTTCCGAAACAGGC  | 21,71 |
| AGCGGTAGCCTCCCACTTAACCTATGCCTTGG  | 23,23 |
| TAACTGATTTTCTCCTGGTCCGCTAGCTGAT   | 23,39 |
| CTATGGTCTTAATATAACCCTCGGAGGCAAG   | 23,55 |
| GGGAGAGGGTGAAACAGGCCACCTGGCTCGGG  | 23,71 |
| GAGTGCCCCCTCGGCAGCCGCCTCGGTTATAC  | 25,23 |
| TCGTCAAGCCTGCTTTCCATAGCTAACCCGAT  | 25,39 |
| TGTGCATTCCACGTGAGTCGTAATAAGCAA    | 25,55 |
| ACGTGGGAGTGCCCCGAGCGTCTGAGGTATGGT | 25,71 |
| TTACCCACTATGTTGTCTCAAGTGCTAACAGT  | 27,23 |
| ACTAATTATCCATAACTGTGCACGTACGGGAT  | 27,39 |
| TCTACCCGGTGGCCGTTGCTACATCAGTTTCT  | 27,55 |
| TTGCACTCCTGGGAAAACATACTTACGCACT   | 27,71 |
| GGTTTGGAGGGATTAGGCAATTGCTAGGTTGC  | 29,23 |
| ATTGTAGGCACAATTTTGATTGATCACATA    | 29,39 |
| CATGGGCAATAAAGCTGTAGCCTGAGGCGCGC  | 29,55 |
| AGCTGCACCGTGTACCTTGATATTGAGGGAC   | 29,71 |
| ACCTCGTCATTCGGATAAACCCATACTGAGGGC | 31,23 |
| AGTGGGCGAGATCGGCTAATCATTAGTGCTCC  | 31,39 |
| CTTAGTTAGTTCATAGTTCATTAGGGGCGGAA  | 31,55 |
| ATGGGCTGGTGCCCCACGTACAGTAAACCAACC | 31,71 |
| GGTGACTGTGGGTAGGGCCGAGCGCTGGGC    | 33,23 |
| TTACATGTGCAAGTGAATATATGACTTGCTC   | 33,39 |

|                                                   |       |
|---------------------------------------------------|-------|
| GACCAGATCTGCTAGAAACCACCAACATCCTC                  | 33,55 |
| CTTGACACCTTCAATTTTAGTAAACACCCA                    | 33,71 |
| ACAGAGCTGAACTTCCCATGGTCTTCTACTG                   | 35,23 |
| TCGTATGATCATAGGATCAAATAAATACAGC                   | 35,39 |
| GTACCGCCAGTCTTGTCTTATTGGCGATCG                    | 35,55 |
| TGCATTCCAATGTTTGTATGGCCGCTGGCTTA                  | 35,71 |
| TAAAGACGGCCGGTGAACACATAAAGTCGT                    | 37,23 |
| CCGCCTCCGGTAGTCAACGCGGAACGTAATGG                  | 37,39 |
| CAGAAAGTCTATACCCGACAAAAACAGATTG                   | 37,55 |
| TACCGGGGTGAACAGCACGTGCGGCTTCTCCT                  | 37,71 |
| GTATCGCCTTGTGTATTATACTTTCGCGGGG                   | 39,23 |
| GGTCGAGCGCTCCACTGTAGTGGCCGCCATC                   | 39,39 |
| GTGGACTAGAAAGCGCCGCAATCTGAATATC                   | 39,55 |
| GCTACCTCCGATACGCGAACAGAACCATTTA                   | 39,71 |
| AGAGTAGGGGCAGTGCTCAGCCAAACAGTGGGACATCTCGGAAAGGTG  | 41,23 |
| TCCCAAGTGCAAGTAAAAAAGGAATTATGAGA                  | 41,39 |
| TCAATGTGGGATCCTAAAGTTCTGGTAGACCTCGTAGGCTAGAGCGGT  | 41,55 |
| GATATCCACGGTACATTCGTTTACTGCACGGA                  | 41,71 |
| ACGAGAGTGTGGCATAAGCAAGAGAAACCTAACTTGGGGACTAAGAT   | 43,39 |
| CGTTGCGAATTTTCGCGGATTCGCATGTAGCCGAACGAGATCGTCTC   | 43,71 |
| AGACGACGGATCTCCT                                  | 56,8  |
| GCATGCCGGTAGCACCGTCAAATATGCGTGCT                  | 57,23 |
| TTTAAACGCTTAGACCCAGCTTGACGCAAGACGCTAATCACTGGGCAG  | 57,39 |
| GGTCTAGGTTGCAGAAACCTACCCCTAAGC                    | 57,55 |
| AGCGTAGTAAGGGTTACAAGTTCCTGCGGCGG                  | 57,71 |
| CTGTACGAATGAGTCC                                  | 59,23 |
| GGCCTTGACATGACATTCTCCACCCGTCCAACACCAGCAGGATGTGCG  | 59,55 |
| AGCCCACTTGGACAGTAGTACAGTATCTTT                    | 59,71 |
| TTTCATGGCGGATGTCGCGGTTTGCTGCGGTGCGTACGGCTTTTAT    | 61,23 |
| ATAGCGTAGACCGGACAACCCCGTAAATCGTA                  | 61,39 |
| AGAGTCGTTATGCCCCCGTCTGCTAGAGTGGGACTGGATCAGATG     | 61,55 |
| TTCAAGTATTCGGTGACCTCCCGCATTACAA                   | 61,71 |
| CGCGCTTACCAAGTAACGTATGTACGACGCGATGCGAGTGAACGGGTG  | 63,39 |
| GATGAATTTGTTTCGGGGCCAGGCGATCTAAGTCTGGCGGTGAGGAC   | 63,71 |
| ACGTAAGTTGAAGTAG                                  | 76,8  |
| GAAGCTTTTCTAGCCATAGCATCGACACTAC                   | 77,23 |
| GACCTGCTTTTCGACACGGACTGCATTCTGGACAGTAACTGCATTAAC  | 77,39 |
| TACGTGCTCCCAACATAAGTGACGTCTCAGC                   | 77,55 |
| AGTTGAAAATATCTCGATAAGCAGAAGGACC                   | 77,71 |
| TGTATAACTGGCAAGA                                  | 79,23 |
| GACAAGCGCGCTTCAGAAAGGATAGCCGGACCGTATTAATGCCGCGCC  | 79,55 |
| AACGGTTTCCCGGACCTAGTGTCTATCAAGTC                  | 79,71 |
| TATTCTATGAAACCATTTCTCGGGTCGAGCGGGTCACTGTTGTGACCTA | 81,23 |
| CGAGAAGCGTATAGATGTTCCGCGCAATAGC                   | 81,39 |
| TCACAGGCGAACTACGTATGAATTTGGTTTAAACGCTCCTCGGGAATTA | 81,55 |
| ATACGACAGGTGGCAAACCACTCCGATGTCA                   | 81,71 |
| GCGCGCATACCACTACTGTGAATTTCCACACCGAGGATTCGCGAGG    | 83,39 |
| TCCATGGGATTCACCAAGCTCGTATACACCCTGATTCTCCATGGCAGC  | 83,71 |
| GCTTCGGTACAGGTCT                                  | 96,8  |
| GAACGGTAGATCACCATTAGTGTACCCAGCA                   | 97,23 |
| GTTCCGGTCCCTGTGGACTCGGATACCCGGTCTGCTGTAATGCTG     | 97,39 |
| TTCCGGGGTAAATCAAGCTTTATAAATTTCCG                  | 97,55 |
| ACGCTCTGTTCCAACTTTAGAGCCCGGCGGT                   | 97,71 |
| AATCTCGGATTCCTTA                                  | 99,23 |
| AAAACCAGGCGCAATCTCATGGCATAAACGAAACCAATCATAACGAGC  | 99,55 |
| GTGGAGGGAAGTTATTCTACTGGCGTTTTCAT                  | 99,71 |
| GTATGATTTTTTTTTTTTTTTTTTTTAAAGGAAT                | 0,15  |
| AGATGTTCAACCGTGAAGCTGTTCTCCCCGTC                  | 0,31  |
| ACCCGAGCCAACCAAATGCCATGAGATTGCGC                  | 0,47  |
| ATAATAGTTGAGACTTCATCCGGTTACTTCG                   | 0,63  |
| TTTTTTTATAGCCAGCCCTCCACTTTTTTTTT                  | 0,79  |
| CACTGAGTTTTTTTTTTTTTTTTTTGGTGATCT                 | 2,15  |
| AAGTAACTACTCGATTCACATTAGAATATGG                   | 2,31  |
| ATTTCCGCCATCCCTAGCCGAACTTGATTTA                   | 2,47  |
| AGCGAATTGCGGCCATGGCGCATATGAGCTTT                  | 2,63  |
| TTTTTTTTTCCGGTTCAGAGCGTTTTTTTTTT                  | 2,79  |
| GTATTAGCTTTTTTTTT                                 | 4,15  |
| GGGGTACAAGTGTGTACCGTTCGCTCAGCCCCAGTGAGCTCGACA     | 4,47  |



|                                                   |       |
|---------------------------------------------------|-------|
| TTTTTTTTTAAGCGTTACAGGGCGCAGTCTCTTCTTCTCGTATATCA   | 4,79  |
| GAGGGAACTTTTTTTT                                  | 6,15  |
| CCAGGTCAGTTCGGGTTACAGAAACCCTAGCTACTTTAGGCCCAAGGAG | 6,47  |
| TTTTTTTTACAGCTAAGTGGCTGGCCATTATACACGCGAGCTATGTAG  | 6,79  |
| TTCTTAAATTTTTTTT                                  | 8,15  |
| CACCAGAATCCAGCTCCATATCTCGGATCACATCTTTGGGGTCGT     | 8,47  |
| TTTTTTTTGTGGGACGTATGATTGAGTTTTGGCTCGACGGTTAATTTG  | 8,79  |
| GAACTTGATTTTTTTTTTTTTTTTTGGGGATGAATCCTTCCAACATCTC | 10,15 |
| CGCACGGCGCGTATCCTCCAAACCAATTGTG                   | 10,31 |
| TGACGATCTCAGTCGTAAAGACTGTGCGAGATCTTTACGCGCTTGAAC  | 10,47 |
| ATCGACTATATCCCAATGCCCATGGTGACACG                  | 10,63 |
| TTTTTTTTGAAGCGTAGAGTCGGCTTTTTTTTT                 | 10,79 |
| AGCTTGGGTTTTTTTTTTTTTTTTTCGCGATCACACTGACACCCTTTT  | 12,15 |
| CTAATATATTAGCTAGTGGGTAAGTTATGGA                   | 12,31 |
| CGTTTGTCTGGGTAAGGGCATCACCTAGAAAATCAGAGCCGAGGTCAGG | 12,47 |
| CCAAGTCAAGGATATGCGGTGAGATTTCCCGAG                 | 12,63 |
| TTTTTTTTAACCTCGTAGCTCCGTTTTTTTTT                  | 12,79 |
| ATTACCGTTTTTTTTTTTTTTTTTAAAAAGCCGGGCTGATCCCGCAAC  | 14,15 |
| GTCGCTGGCACCCCGGGGCACTCAAAGCAGG                   | 14,31 |
| CGAGTCGTCAGAAGTGAACAGCATGGCTTCATTAGCCCGGCTCCCGGT  | 14,47 |
| TTAGTGAGTCGTTCGAAATGCACATCGGGCAC                  | 14,63 |
| TTTTTTTTGAAGGAGTGCATCAGATTTTTTTTT                 | 14,79 |
| AGTTTCTTTTTTTTTTTTTTTTTTGGAGATGCGGATACTTTGAAAAGGC | 16,15 |
| CTTACATCGCCCTCGCTACCGCTAGGAGAAA                   | 16,31 |
| AACTACTGGATGTCCGGACATGAATACTCTGAATGAACACCCCGCTGC  | 16,47 |
| AATTCTCACTAATCACGACCATAGTGTTCAC                   | 16,63 |
| TTTTTTTTCTGTTTACGACCCGAATTTTTTTTT                 | 16,79 |
| TGGAGTTATTTTTTTTTTTTTTTTTTGGCCACTTAACTGGATAGGACA  | 18,15 |
| GTCGCATAGTTTCTTCTATCTTACGCTTAC                    | 18,31 |
| GTTTGAACATCATGGTCAACAGTTGTGCGTTGAGTTTCGTATATGCTCT | 18,47 |
| GCTATGCTGCCCTACTCGTCTCGAGAAA                      | 18,63 |
| TTTTTTTTTCGCAGGGTCTATCTTCTTTTTTTTT                | 18,79 |
| GTATTACTTTTTTTTTTTTTTTTTTCTGCTCTA                 | 20,15 |
| CGAATCAAAGGTAGAGGGCGATACAGTGGAGC                  | 20,31 |
| GGTACACGTATGTGATCATAGGTATTCATAAC                  | 20,47 |
| ATATCAAGTATTTTCGATAGTCCACGCGTATCG                 | 20,63 |
| TTTTTTTTGTCCCTCAAGATTGATTTTTTTTT                  | 20,79 |
| TAGGTTAATTTTTTTTTTTTTTTTTTACGCTTAG                | 22,15 |
| GTATTTCCCAAGGCACGTCTTAATGACTACC                   | 22,31 |
| CGAGGGTTTTCTGGTCGATAGCTGGGATATCG                  | 22,47 |
| CGAACAGCTTGCCTCACTTCTGGCTGTTC                     | 22,63 |
| TTTTTTTTGCTGTTTGGTTCAGAAATTTTTTTTT                | 22,79 |
| GAGGCGCTTTTTTTTTTTTTTTTTTGTATAGCG                 | 24,15 |
| GCGGAACCGTATAACCAGCTCTGTTCCTATGATCATACGACAAGAACT  | 24,31 |
| AGTACGACATCAGCTAGACAGGGACCACCGCA                  | 24,47 |
| AGTGGCCTTGCTTTAGGCGGTACCAAACATTGGAATGCATTTTTTTT   | 24,63 |
| TTTTTTTTCCCGAGCCCCCAAGTTTTTTTTT                   | 24,79 |
| CACCTGAGTTTTTTTTTTTTTTTTTGGAAAGGAC                | 26,15 |
| AGCTATGGACTGTAGGGTACACCTCACTTGACATGTAATCTAGCAG    | 26,31 |
| ATGTAGCAATCGGGTTGCCGGAGTAGACGTGC                  | 26,47 |
| TCAGACGCAGAAACTGATCTGGTCATTGAAAGGTGCAAGTTTTTTTT   | 26,63 |
| TTTTTTTTACCATAACACAGTCTTTTTTTTT                   | 26,79 |
| GCAATTGCTTTTTTTTTTTTTTTTTTCTGACAGA                | 28,15 |
| CGTGACAGCAACCTAGACGAGGTGCCGATCTCGCCACTCTATGAAC    | 28,31 |
| CAGGCTACATCCCTGACCAGCCGCGCAGGG                    | 28,47 |
| AGTATAGTGCAGCCTTAACTAAGTGGGGCACCAGCCATTTTTTTTT    | 28,63 |
| TTTTTTTTAGTGCAGTGGGCGCTTTTTTTTT                   | 28,79 |
| AATGATTACCCCGCAAGAGTATATTTTTTTTTTTTTTCTAATCCC     | 30,31 |
| ACTGTACGGATATCAGATTGCCGGGAGCACTCTACAATAGCTTTAT    | 30,63 |
| TTTTTTTTGGTGGTGTGACGCTTTTTTTTT                    | 30,79 |
| TTTTTTTTATCCGAAT                                  | 31,0  |
| CATATATTGCCCTCAGTATGGTTTTTTTTTTTTTTTTTTTACAACATA  | 32,31 |
| TACTAAAATCCGCCCTAATGAAGACCAAGTTAATTAGTACGGCCAC    | 32,63 |
| TTTTTTTTTGGGTGTGAGTGAATTTTTTTTT                   | 32,79 |
| TTTTTTTTTACCACA                                   | 33,0  |
| TAGTTTGAAGCCAGCGCTCGGCCCTTTTTTTTTTTTTTTTGGCCGAGG  | 34,31 |
| GCGGCCATGAGGATGTTGGTGGTGTCTGATTTCTTGACGATCACGTGG  | 34,63 |
| TTTTTTTTTAAGCCACTCCCAGTTTTTTTTT                   | 34,79 |

|                                                  |       |
|--------------------------------------------------|-------|
| TTTTTTTTGGAAGTTC                                 | 35,0  |
| CGACCATGTTTTTTTTTTTTTTGTGGGAGG                   | 36,15 |
| TTCCGCGTCAGTAGAATCTTGCTTATGCCAGC                 | 36,31 |
| AATAAGGACCATTACGATCAGTTAATATTAAG                 | 36,47 |
| CCGCACGTCGATCGCCCGAATCGCGCGAAAAAT                | 36,63 |
| TTTTTTTTTAGGAGAAGCCTCTCCCTTTTTTTT                | 36,79 |
| ATGTGGTTTTTTTTTTTTTTTTTTGCTGTGAC                 | 38,15 |
| GCCACTACACGACTTTCCTACTCTTTACTTGC                 | 38,31 |
| TTTTGTGTCGATGGCCGGTCCAACATGATAATC                | 38,47 |
| TCTGGTTCCAAATCTGCCACATGAATGTACCG                 | 38,63 |
| TTTTTTTTTAAATGGTCTAACGATTTTTTTTT                 | 38,79 |
| TGGCTGATTTTTTTTTTTTTTTTTTATACACAA                | 40,15 |
| CGAGATGTCCCACTGTTCTGACAGTTGGACGG                 | 40,31 |
| CAGAACTCACCTTTCGCTCGACCGCTTTC                    | 40,47 |
| AGCCTACGAGGTCTACTCAAGGCCTGTCAAGT                 | 40,63 |
| TTTTTTTTTACCGCTCTGAGGTAGCTTTTTTTT                | 40,79 |
| CCCAAGTTTTTTTTTTTTTTTTTACACCGGC                  | 42,15 |
| TTCCTTTTATCTTAGTCGGCATGCGGTCTAAA                 | 42,31 |
| CTCGTTCGTCTCATAAGGAGCGGGGGTATAG                  | 42,47 |
| GTAAACGAAGGACGATCTAGGACCTAACCTT                  | 42,63 |
| TTTTTTTTTCCGTGCACCCCGGTATTTTTTTT                 | 42,79 |
| CGTCGTCTTTTTTTTTTTTTTTTTTIAAGTTTC                | 56,15 |
| TCAAGCTGAGGAGATCTACATACGTTACTTGG                 | 56,31 |
| TGATTAGCGTCTTGCAGCTCTCGTGTACATG                  | 56,47 |
| GGAACTTGCTGCCAGGCCTGGCCCCGAACGA                  | 56,63 |
| TTTTTTTTTCCGCCGCATCGCAACGTTTTTTTT                | 56,79 |
| TAITTGACTTTTTTTTTTTTTTTTTTGCAGTCC                | 58,15 |
| TGCTGGTGAGCACGCACCATGAAAGTCCGGTC                 | 58,31 |
| GGTAGGTTGACATCCACTTGGGATTAGGATC                  | 58,47 |
| TGTACTACGCTTAGGGACGACTCTTACCGAA                  | 58,63 |
| TTTTTTTTTAAAGATACTGGATATCTTTTTTTT                | 58,79 |
| AACGGCGATTTTTTTTTTTTTTTTTTGGACTCAT               | 60,15 |
| CGTACGCACGCGAGCAGTTATACAGGTCCGGC                 | 60,31 |
| AGAACCGGATAAAAAGCGTGGGAGAATGTCATG                | 60,47 |
| CCAGTCCCCTCTAGCGCCTTGTCCGTCCGGG                  | 60,63 |
| TTTTTTTTTCACTGATTGTGGGCTTTTTTTTTT                | 60,79 |
| CACTCGCATTTTTTTTTTTTTTTTTTGGTGCTAC               | 62,15 |
| ACGGGGTTCACCCGTTAAAGCTTCTGTGCAAA                 | 62,31 |
| GCGCCAGATACGATTTGCGTTAAATCTGCAAC                 | 62,47 |
| CGGGGAGGGTCTCACAGCACGTAGAGATAAT                  | 62,63 |
| TTTTTTTTTTGTAATGACTACGCTTTTTTTTTT                | 62,79 |
| ACTTACGTTTTTTTTTTTTTTTTTTCGCGTCG                 | 76,15 |
| GCAGTCCGCTACTTCATCACAGTGAATGGGTA                 | 76,31 |
| AGTFACTGTCCAGAATTAAGCGCGCTTAGATC                 | 76,47 |
| TGCTTATCGTTAATGCTACGAGCTTGGTGAAT                 | 76,63 |
| TTTTTTTTTGGTCCCTCAATTCATCTTTTTTTT                | 76,79 |
| GATGCTATTTTTTTTTTTTTTTTTCATCGCCG                 | 78,15 |
| ATTAATACGTAGTGCATAGAATAATCTATAC                  | 78,31 |
| CGTCACTTGGCGCGCTACGCTATGGGGCATA                  | 78,47 |
| AGACACTAGCTGAGGAGCCTGTGATTGCCACC                 | 78,63 |
| TTTTTTTTGACTTGATTACTIONGAAATTTTTTTT              | 78,79 |
| ACCCGAGATTTTTTTTTTTTTTTTCTTGCCA                  | 80,15 |
| AACAGTGACCCGCTCGCCGAGATTTTCGTTTA                 | 80,31 |
| AATTCATATAGGTCACATCCTTCTGAAGCG                   | 80,47 |
| GAGGAGCGTTAAACCCTGGTTTAATAACTT                   | 80,63 |
| TTTTTTTTTAAATCCCAAACCGTTTTTTTTTTT                | 80,79 |
| TCCTCGTTTTTTTTTTTTTTTTTTGGCTAGAA                 | 82,15 |
| CGCGAAACCCTGCGAAACCAGTTCACAAGGG                  | 82,31 |
| GGAGAAATCGCTATTCGAGCAGGTATGTTGGG                 | 82,47 |
| GAGGTGGTGTGCCATCCCCGGAAGTTGGAA                   | 82,63 |
| TTTTTTTTTGACATCGTTTCAACTTTTTTTTTT                | 82,79 |
| CCCGAGTCAGACCTGTACCGAAGCTTTTTTTTTTTT             | 96,31 |
| GCTCTAAACAGCATTACACGACGACCGGGTATTGCGGCGCAGGGTGT  | 96,63 |
| TTTTTTTTTACGGCCGGCCATGGATTTTTTTTTT               | 96,79 |
| GATTGGGTGTGCTGGGTACACTAAATTTTTTTTTTTT            | 98,31 |
| GCCAGTAGCGGGAATTTATAAAGCGCTCGTATGCTTCTCGCGTAGTTC | 98,63 |
| TTTTTTTTTATGAAAACGTGCTATTTTTTTTTT                | 98,79 |

## S4.3 XY-4H×4H×32B-tube crystal sequences

|                                  |       |
|----------------------------------|-------|
| CCAGGTTAAGTGGCTCAATCATACTCACGGTT | 1,23  |
| AACTGTTGTGTCCTATGTTTACTTAGGGATGG | 1,39  |
| TACGAACTCAACGCACGCTCGGGTAGTCTCAA | 3,23  |
| GAAGATAGAGAGCATAAATTCGCTAAACCGGA | 3,39  |
| AAAGTATCCGCATCTCACTCAGTGATCGAGTA | 5,23  |
| TTCATGTCGCCTTTTCGAACGGTGACACACTT | 5,39  |
| GTGTTCAITCAGAGTAGCGGAAATATGGCCGC | 7,23  |
| TTCGGTGCGCAGCGGGCCGCTGTAACGCTTA  | 7,39  |
| ATCAGCCCCGGCTTTTGCTAATACGCTGAGCG | 9,23  |
| ATGCTGTTGTTGCGGGGTTTCTGAACCGGAAC | 9,39  |
| CCGGGCTAATGAAGCCGTGACCCAGAGACTG  | 11,23 |
| TCTGATGCACCGGGAGCCAGCCACTTAGCTGT | 11,39 |
| GTCAGTGTGATCGCGAGTTCCTCTAGCTAGG  | 13,23 |
| GTGATGCCAAAAGGGTGGATATGGAGCTGGAA | 13,39 |
| CGGCTCTGATTTCTAGTGACCTGGTATAATGG | 15,23 |
| CGGAGCTACCTGACCTCAATCATACTGCCAC  | 15,39 |
| GTATGATTTTTTTTTTTTTTTTTCTAGAAAT  | 0,15  |
| AGCGAATTAACCGTGAATGAACACCCCGCTGC | 0,31  |
| TTTTTTTTCCGGTTTTAGCTCCGTTTTTTTT  | 0,47  |
| ACCCGAGCTTTTTTTTTTTTTTTTCGCGATC  | 2,15  |
| AAGTAACTTGAGACTGATACTTGAAAAGGC   | 2,31  |
| TTTTTTTTCCATCCCTGGCATCACTTTTTTTT | 2,47  |
| ATTTCCGCTTTTTTTTTTTTTTTGTGCGTTG  | 4,15  |
| CACCGTTCCGGGCCATTAGCCCGCTCCCGGT  | 4,31  |
| TTTTTTTTAAGTGTGCTATCTTTTTTTTTT   | 4,47  |
| CACTGAGTTTTTTTTTTTTTTTGTGAGCCACT | 6,15  |
| ACAGGCGGTAICTGATGGGCTGATCCCGCAAC | 6,31  |
| TTTTTTTTAAGCGTTCAACAGTTTTTTTTTT  | 6,47  |
| GTATTAGCTTTTTTTTTTTTTTTACTCTGA   | 8,15  |
| GTGGCTGGCGCTCAGCCAGAGCCGAGGTCAGG | 8,31  |
| TTTTTTTTACAGCTAAGCACCGAATTTTTTTT | 8,47  |
| GGGGTCACTTTTTTTTTTTTTTTGAGATGCG  | 10,15 |
| TCAGAAACCAGTCTTACACTGACACCCTTTT  | 10,31 |
| TTTTTTTTGTTCCGGTGACATGAATTTTTTTT | 10,47 |
| CCAGGTCATTTTTTTTTTTTTTTGGCTTCAT  | 12,15 |
| CCATATCCCATTATAAGTTCGTATATGCTCT  | 12,31 |
| TTTTTTTTTCCAGCTGCATCAGATTTTTTTT  | 12,47 |
| GAGGGAACTTTTTTTTTTTTTTAAAAGCCC   | 14,15 |
| TATGATTGCCTAGCTATAACCTGGATAGGACA | 14,31 |
| TTTTTTTTGTGGGACGAACAGCATTTTTTTTT | 14,47 |

## S4.4 XY-4H×4H×32B-cuboid crystal using alternating DNA-bricks sequences

|                                   |       |
|-----------------------------------|-------|
| CCAGGTTAAGTGGCTCAATCATACTCACGGTT  | 1,23  |
| AACTGTTGTGCCTATGTTTACTTAGGGATGG   | 1,39  |
| TACGAACTCAACGCACGCTCGGGTAGTCTCAA  | 3,23  |
| GAAGATAGAGAGCATAAATTCGCTAAACCGGA  | 3,39  |
| AAAGTATCCGCATCTCACTCAGTGATCGAGTA  | 4,8   |
| TTCATGTCGCCTTTTCGAACGGTGACACACTT  | 4,24  |
| GTGTTCAITCAGAGTAGCGGAAATATGGCCGC  | 6,8   |
| TTCGGTGCGCAGCGGGCCGCTGTAACGCTTA   | 6,24  |
| ATCAGCCCCGGGCTTTTGCTAATACGCTGAGCG | 9,23  |
| ATGCTGTTGTTGCGGGGTTTCTGAACCGGAAC  | 9,39  |
| CCGGGCTAATGAAGCCGTGACCCAGAGACTG   | 11,23 |
| TCTGATGCACCGGAGCCAGCCACTTAGCTGT   | 11,39 |
| GTCAGTGTGATCGCGAGTTCCTCTAGCTAGG   | 12,8  |
| GTGATGCCAAAAGGGTGGATATGGAGCTGGAA  | 12,24 |
| CGGCTCTGATTTCTAGTGACCTGGTATAATGG  | 14,8  |
| CGGAGCTACCTGACCTCAATCATACTGCCAC   | 14,24 |
| GTATGATTTTTTTTTTCCATTATA          | 0,15  |
| AGCGAATTAACCGTGAATTTCCGCAAGTGTGT  | 0,31  |
| TTTTCCGGTTTCCATATCCTTTT           | 0,43  |
| TTTTGAGCCACTCAGAGCCGTTTT          | 1,4   |
| TAACCTGGATAGGACAGCACCGAATACTCTGA  | 1,16  |
| CAACAGTTTTTTTTTTAGGTCAGG          | 1,32  |
| ACCCGAGCTTTTTTTTCCCTAGCTA         | 2,15  |
| AAGTAAACTTGAGACTCACTGAGTTAAGCGTT  | 2,31  |
| TTTTCCATCCCTTATGATTGTTTT          | 2,43  |
| TTTTGTGCGTTGACACTGACTTTT          | 3,4   |
| AGTTCGTATATGCTCTGACATGAAGAGATGCG  | 3,16  |
| CTATCTTCTTTTTTTTACCCTTTT          | 3,32  |
| GTATTAGCTTTTTTTTTCGGCCAT          | 8,15  |
| GTGGCTGGCGCTCAGCCAGGTCATTCCAGCT   | 8,31  |
| TTTACAGCTAACACCGTTCTTTT           | 8,43  |
| TTTTAAAAGCCCATGAACACTTTT          | 9,4   |
| GGGCTGATCCCGCAACTAGCTCCGCTAGAAAT  | 9,16  |
| AACAGCATTTTTTTTTCCCGCTGC          | 9,32  |
| GGGGTCACTTTTTTTTACTCGAT           | 10,15 |
| TCAGAAACCAGTCTCTGAGGGAACGTGGGACG  | 10,31 |
| TTTTGTCCGGTACAGGCGGTTTT           | 10,43 |
| TTTTGGCTTCATGATACTTTTTTT          | 11,4  |
| TAGCCCGGCTCCCGGTGGCATCACTCGCGATC  | 11,16 |
| GCATCAGATTTTTTTTGAAAAGGC          | 11,32 |

## S4.5 XY-4H×4H×64B-cuboid crystal sequences

|                                     |       |
|-------------------------------------|-------|
| CCAGGTTAAGTGGCTCAATCATACTCACGGTT    | 1,23  |
| AACTGTTGTGCTATGTTACTTAGGGATGG       | 1,39  |
| TACGAACTCAACGCACGCTCGGGTAGTCTCAA    | 1,55  |
| GAAGATAGAGAGCATAAATTCGCTAAACCGGA    | 1,71  |
| AAAGTATCCGCATCTCACTCAGTGATCGAGTA    | 3,23  |
| TTCATGTCGCCTTTTCGAACGGTGACACACTT    | 3,39  |
| GTGTTCAITCAGAGTAGCGGAAATATGGCCGC    | 3,55  |
| TTCGGTGCGCAGCGGGCCGCTGTAACGCTTA     | 3,71  |
| ATCAGCCCCGGCTTTTGCTAATACGCTGAGCG    | 5,23  |
| ATGCTGTTGTTGCGGGGTTTCTGAACCGGAAC    | 5,39  |
| CCGGGCTAATGAAGCCGTGACCCAGAGACTG     | 5,55  |
| TCTGATGCACCGGGAGCCAGCCACTTAGCTGT    | 5,71  |
| GTCAGTGTGATCGCGAGTTCCTCTAGCTAGG     | 7,23  |
| GTGATGCCAAAAGGGTGATATGGAGCTGGAA     | 7,39  |
| CGGCTCTGATTTCTAGTGACCTGGTATAATGG    | 7,55  |
| CGGAGCTACCTGACCTCAATCATACTGCCAC     | 7,71  |
| GGAAGGATTCATCCCTTTAAGAATGATCGCA     | 9,23  |
| CAGTCTTTGAGATGTTGAACATCTTTGGTTG     | 9,39  |
| GCGTAAAGATCTCGCATCTGGTGCCAAAAC      | 9,55  |
| GCCGACTCGTTCAAGCACTATTATCTGGCTAT    | 9,71  |
| AAAAGATGCTGTGACGCCAAGCTTAGCATAA     | 11,23 |
| GCGGCTGGACGACCCGCGCTGCGACGACTGA     | 11,39 |
| CCGTGAGCCCTGCGCGACAAACGCATATCCT     | 11,55 |
| CGGCCCGCCAAATTAATAGTCGATTACGCTTC    | 11,71 |
| GCCTAAAGGTCTTCACGGTAATCGGGGGTG      | 13,23 |
| ACTCCGGCTCCTTGGTATATTAGCTTACCCA     | 13,39 |
| CTCGCGTGGCAGTCTACGACTCGTCGAACGA     | 13,55 |
| GGACTGTTCTACATAGTGACTTGGACGAGGTT    | 13,71 |
| TCACTGGGCGCTATACAGGAAACTCGAGGGGC    | 15,23 |
| TCCCTGTCTGTCGAGCCAGCGACCACTTCTG     | 15,39 |
| GAGAAAGATGCGGTGGCAGTAGTTGTGATTAG    | 15,55 |
| CTTGGGGGTGATATACCTCACTAAACTCCTTC    | 15,71 |
| GTATGATTTTTTTTTTTTTTTTGTATAGCG      | 0,15  |
| CACCGTTCAACCGTGAACACTGACACCTTTT     | 0,31  |
| ACCCGAGCAAGTGTGTGACAGGGACCACCGCA    | 0,47  |
| ACAGGCGGTTGAGACTCAGAGCCGAGGTCAGG    | 0,63  |
| TTTTTTTTTAAGCGTTCCCCAAGTTTTTTTTT    | 0,79  |
| CACTGAGTTTTTTTTTTTTTTTTGGAAGGAC     | 2,15  |
| AAGTAAACTACTCGATGGGCTGATCCCGCAAC    | 2,31  |
| ATTTCCGCCATCCCTGCCGGAGTAGACGTGC     | 2,47  |
| AGCGAATTGCGGCCATTAGCCCGCTCCCGGT     | 2,63  |
| TTTTTTTTTCCGGTTAACAGTCTTTTTTTTTT    | 2,79  |
| GAGGAACTTTTTTTTTTTTTTTGAGATGCG      | 4,15  |
| TCAGAAACCCTAGCTACATCTTTGGGGTCTG     | 4,31  |
| CCAGGTCAGTTCGGTGACATGAATACTCTGA     | 4,47  |
| GTGGCTGGCCATTATACGACGCTTAATTG       | 4,63  |
| TTTTTTTTTACAGCTAAGCACCGAATTTTTTTT   | 4,79  |
| GTATTAGCTTTTTTTTTTTTTTTGAGCCACT     | 6,15  |
| CCATATCCCGCTCAGCATCTTCCAACATCTC     | 6,31  |
| GGGGTCACTTCCAGCTCAACAGTTGTGCGTTG    | 6,47  |
| TATGATTGCAGTCTCTTTACGCGCTTGAAC      | 6,63  |
| TTTTTTTTTGTGGGACGCTATCTTTTTTTTTT    | 6,79  |
| TTCTAAATTTTTTTTTTTTTTTTTCGCGATC     | 8,15  |
| CGCACGGCTGCGATACCCAGTGAGCTCGACA     | 8,31  |
| CACCAGAATCAGTCGTGGCATCACCTAGAAAT    | 8,47  |
| ATCGACTAAGTTTGGTCTTCTCGTATATCA      | 8,63  |
| TTTTTTTTTGAAGCGTATAGCTCCGTTTTTTTTT  | 8,79  |
| AGCTTGGGTTTTTTTTTTTTTTTAAAAGCCC     | 10,15 |
| AGATGTTCTTATGCTACTTTAGGCCAAAGGAG    | 10,31 |
| CGTTTGTCCAACAAAAACAGCATGGCTTCAT     | 10,47 |
| ATAATAGTAGGATATGCACGCGAGCTATGTAG    | 10,63 |
| TTTTTTTTTATAGCCAGGCATCAGATTTTTTTTTT | 10,79 |
| AGTTTCCTTTTTTTTTTTTTTTTCTGACAGA     | 12,15 |
| CTAATATAGCCCCTCGGATACTTTGAAAAGGC    | 12,31 |
| AACTACTGTGGGTAAGCCAGCCGCGCAGGG      | 12,47 |
| CCAAGTCACTAATCAGATGAACACCCCGCTGC    | 12,63 |

|                                  |       |
|----------------------------------|-------|
| TTTTTTTAACTCGTGCGGGCCGTTTTTTTT   | 12,79 |
| ATTACCGTTTTTTTTTTTTTTTTGGGGATGA  | 14,15 |
| GTCGCTGGCACCCCGTAACTGGATAGGACA   | 14,31 |
| CGAGTCGTCAGAAGTAAAAGACTGTGCGAGAT | 14,47 |
| TTAGTGAGTCGTTCGAAGTTCGTATATGCTCT | 14,63 |
| TTTTTTTGAAGGAGTGAGTCGGCTTTTTTTTT | 14,79 |

## S4.6 XY-4H×4H×128B-cuboid crystal sequences

|                                   |        |
|-----------------------------------|--------|
| CCAGGTTAAGTGGCTCAATCATACTCACGGTT  | 1,23   |
| AACTGTTGTGCTATGTTACTTAGGGATGG     | 1,39   |
| TACGAACTCAACGCACGCTCGGGTAGTCTCAA  | 1,55   |
| GAAGATAGAGAGCATAAATTCGCTAAACCGGA  | 1,71   |
| AAAGTATCCGCATCTCACTCAGTGATCGAGTA  | 1,87   |
| TTCATGTCGCCTTTTCGAACGGTGACACACTT  | 1,103  |
| GTGTTCAITCAGAGTAGCGGAAAATATGGCCGC | 1,119  |
| TTCGGTGCGCAGCGGGCCGCTGTAACGCTTA   | 1,135  |
| ATCAGCCCCGGGCTTTTGCTAATACGCTGAGCG | 3,23   |
| ATGCTGTTGTTGCGGGGTTTCTGAACCGGAAC  | 3,39   |
| CCGGGCTAATGAAGCCGTGACCCAGAGACTG   | 3,55   |
| TCTGATGCACCGGGAGCCAGCCACTTAGCTGT  | 3,71   |
| GTCAGTGTGATCGCGAGTTCCTCTAGCTAGG   | 3,87   |
| GTGATGCCAAAAGGGTGGATATGGAGCTGGAA  | 3,103  |
| CGGCTCTGATTTCTAGTGACCTGGTATAATGG  | 3,119  |
| CGGAGCTACCTGACCTCAATCATACTGCCAC   | 3,135  |
| GGAAGGATTATCCCTTTAAGAATGATCGCA    | 5,23   |
| CAGTCTTTGAGATGTTGAACATCTTTGGTTG   | 5,39   |
| GCGTAAAGATCTCGCATTCTGGTGCCAAAAC   | 5,55   |
| GCCGACTCGTTCAAGCACTATTATCTGGCTAT  | 5,71   |
| AAAAGATGTCTGTCAGCCCAAGCTTAGCATAA  | 5,87   |
| GCGGCTGGACGACCCCGCCGTGCGACGACTGA  | 5,103  |
| CCGTGAGCCCTGCGCGACAAAACGCATATCCT  | 5,119  |
| CGGCCCGCCAAATTAATAGTCGATTACGCTTC  | 5,135  |
| GCCTAAAGGTCTTCACGGTAATCGGGGGTG    | 7,23   |
| ACTCCGGCCCTCTGGTATATTAGCTTACCCA   | 7,39   |
| CTCGCGTGGCAGTCTACGACTCGTCGAACGA   | 7,55   |
| GGACTGTTCTACATAGTGACTTGGACGAGGTT  | 7,71   |
| TCACTGGGCGCTATACAGGAAACTCGAGGGGC  | 7,87   |
| TCCCTGTCTGTCGAGCCCAGCGACCACTTCTG  | 7,103  |
| GAGAAAGATGCGGTGGCAGTAGTTGTGATTAG  | 7,119  |
| CTTGGGGGTGATATACCTCACTAAACTCCTTC  | 7,135  |
| TAATGTGACTAAGCGTAACTCCAAAGGAAAC   | 9,23   |
| CAGCTATCCATATTCGATGTAAGCGGACATC   | 9,39   |
| TATGCGCCCGATATCCGTTCAAACCTAGGGGGC | 9,55   |
| TTCTGACCAAAGCTCATGAGAATGTAAACAG   | 9,71   |
| GAACAGCTTAGAGCAGTCAAGTTCGGATACGC  | 9,87   |
| TACCTATGGACGGGATATGCGACACCATGAT   | 9,103  |
| CCGGATGAGTTATGAAGATCGTATTGGGATA   | 9,119  |
| TACAATCTCGAAGTAAAGCATAGCACCCCTGCG | 9,135  |
| AAGATAGGGTCACAGCAGTAATACCTTACCT   | 11,23  |
| TGTTGGACGTAAGCGTGAAATAACGACCAGAA  | 11,39  |
| AGCACGAGGATTATCACGTGTACCTCGAAATA  | 11,55  |
| ATCGTTAGTTTCTCGACTGTTCCGAAACAGGC  | 11,71  |
| AGCGGTAGCCTCCCACTTAACCTATGCCTTGG  | 11,87  |
| TAACTGATTTTCTCCTGGTCCGCTAGCTGAT   | 11,103 |
| CTATGGTCTTAATATAACCCTCGGAGGCAAG   | 11,119 |
| GGGAGAGGGTGAAACAGGCCACCTGGCTCGGG  | 11,135 |
| GAGTGCCCCCTCGGCAGCCGCCTCGGTATAC   | 13,23  |
| TCGTCAAGCCTGCTTTCCATAGCTAACCCGAT  | 13,39  |
| TGTGCATTCCACGTGAGTCGTAATAAGCAA    | 13,55  |
| ACGTGGGAGTGCCCCGAGCGTCTGAGGTATGGT | 13,71  |
| TTACCCACTATGTTGTCTCAAGTGCTAACAGT  | 13,87  |
| ACTAATTATCCATAACTGTGCACGTACGGGAT  | 13,103 |
| TCTACCCGGTGGCCGTTGCTACATCAGTTTCT  | 13,119 |
| TTGCACTCCTGGGGAACATACTTACGCACT    | 13,135 |
| GGTTTGGAGGGATTAGGCAATTGCTAGGTTGC  | 15,23  |
| ATTGTAGGCACAATTTTGATTGATCACATA    | 15,39  |
| CATGGGCAATAAAGCTGTAGCCTGAGGCGCGC  | 15,55  |
| AGCTGCACCGTGTACCTTGATATTGAGGGAC   | 15,71  |
| ACCTCGTCATTCGGATAAACCCATACTGAGGGC | 15,87  |
| AGTGGGCGAGATCGGCTAATCATTAGTGCTCC  | 15,103 |
| CTTAGTTAGTTCATAGTTCATTAGGGGCGGAA  | 15,119 |
| ATGGGCTGGTGCCCCACGTACAGTAACCAACC  | 15,135 |
| GTATGATTTTTTTTTTTTTTTTCTAATCCC    | 0,15   |
| TCAGAAACAACCGTACTTTAGGCCCAAGGAG   | 0,31   |

|                                   |        |
|-----------------------------------|--------|
| ACCCGAGCGTTCGGTCTACAATAGCTTTAT    | 0,47   |
| GTGGCTGGTTGAGACTCACGCGAGCTATGTAG  | 0,63   |
| CACTGAGTACAGCTAAGTGCAGCTATCCGAAT  | 0,79   |
| CCATATCCTACTCGATCCCAGTGAGCTCGACA  | 0,95   |
| ATTTCCGCTTCCAGCTCGCCACTCTATGAAC   | 0,111  |
| TATGATTGGCGGCCATTCTTTCTCGTATATCA  | 0,127  |
| TTTTTTTTGTGGGACGCAGCCATTTTTTTTT   | 0,143  |
| GTATTAGCTTTTTTTTTTTTTTTTGGCCGAGG  | 2,15   |
| AAGTAAACCGCTCAGCATCCTTCCAACATCTC  | 2,31   |
| GGGGTCACCCATCCCTCTTGACGATCACGTGG  | 2,47   |
| AGCGAATTCAGTCTCTCTTTACGCGCTTGAAC  | 2,63   |
| GAGGGAACCTCCGGTTTTCCACGTACAACATA  | 2,79   |
| CACCGTTCCCTAGCTACATCTTTTGGGGTCGT  | 2,95   |
| CCAGGTCAAAGTGTGTAATTAGTACGGCCAC   | 2,111  |
| ACAGGCGGCCATTATACTCGACGGTAAATTTG  | 2,127  |
| TTTTTTTTTAAAGCGTTGAGTGCAATTTTTTTT | 2,143  |
| ATTACCGTTTTTTTTTTTTTTTTTAAAAAGCCC | 4,15   |
| AGATGTTCCACCCCGCCTATCTTACGCTTAC   | 4,31   |
| CGAGTCGTCAACCAAAAACAGCATGGCTTCAT  | 4,47   |
| ATAATAGTTCGTTGACTCGTGCTTCGAGAAA   | 4,63   |
| AGTTTCTATAGCCAGGCATCAGATCGCGATC   | 4,79   |
| CGCACGGCGCCCTCGCTACCGCTAGGAGAAA   | 4,95   |
| AACTACTGTCAGTCGTGGCATCACCTAGAAAT  | 4,111  |
| ATCGACTACTAATCACGACCATAGTGTTCAC   | 4,127  |
| TTTTTTTTGAAGCGTATAGCTCCGTTTTTTTTT | 4,143  |
| TTCTTAAATTTTTTTTTTTTTTTTGAGCCACT  | 6,15   |
| CTAATATATGCGATCATCACATTAGAATATGG  | 6,31   |
| CACCAGAATGGGTAAGCAACAGTTGTGCGTTG  | 6,47   |
| CCAAGTCAAGTTTTGGGGCGCATATGAGCTTT  | 6,63   |
| AGCTTGGGAACCTCGTCTATCTTCGAGATGCG  | 6,79   |
| GTCGCTGGTTATGCTAAGCTGTTCTCCCGTC   | 6,95   |
| CGTTTGTCCAGAAGTGGACATGAATACTCTGA  | 6,111  |
| TTAGTGAGAGGATATGTCATCCGGTTACTTCG  | 6,127  |
| TTTTTTTTGAAGGAGTGCACCGAATTTTTTTTT | 6,143  |
| TGGAGTTATTTTTTTTTTTTTTTTGAAGGAC   | 8,15   |
| GTTATTTCTGTTCCCTTCCAACCAAATTTGTG  | 8,31   |
| GTTTGAACCTCTGGTCGCGGAGTAGACGTGC   | 8,47   |
| CGGAACAGGCCCCCTATGCCCATGGTGACACG  | 8,63   |
| GAACTTGAGCCTGTTAACAGTCCGTATAGCG   | 8,79   |
| GCGGAACCGCGTATCCGACGAGGTGCCGATCT  | 8,95   |
| TGACGATCATCAGCTAGACAGGGACCACCGCA  | 8,111  |
| AGGTGGCCTATCCCAATAACTAAGTGGGGCAC  | 8,127  |
| TTTTTTTTTCCCGAGCCCCCAAGTTTTTTTTT  | 8,143  |
| GTATTACTTTTTTTTTTTTTTTTGGGGATGA   | 10,15  |
| CTTACATCAGGTAGAGGGGCACTCAAAGCAGG  | 10,31  |
| GGTACACGGATGTCCGAAAGACTGTGCGAGAT  | 10,47  |
| AATTCTCATATTTGAAAATGCACATCGGGCAC  | 10,63  |
| TAGGTAACTGTTTACGAGTCGGCCTGACAGA   | 10,79  |
| GTCGCATACCAAGGCAAGTGGGTAAGTTATGGA | 10,95  |
| CGAGGGTTATCATGGTCCAGCCGCGCGCAGGG  | 10,111 |
| GCTATGCTTTGCCTCCGGTGAGATTCCCAG    | 10,127 |
| TTTTTTTTTCGAGGGTGCAGGCGGTTTTTTTT  | 10,143 |
| GCAATTGCTTTTTTTTTTTTTTTTGTGTGAC   | 12,15  |
| AGCTATGGGAACCTAGGGCTGATCCCGCAAC   | 12,31  |
| CAGGCTACATCGGGTTGTCCAACATGATAATC  | 12,47  |
| TCAGACGCGCGCGCTTAGCCCGGCTCCCGGT   | 12,63  |
| TATGGTTTACCATAACCTAACGATGTGGGAGG  | 12,79  |
| CGTGCACAGCCCTCAGACACTGACACCCTTTT  | 12,95  |
| CTAATGAAATCCCTGAATCAGTTAATATTAAG  | 12,111 |
| AGTATAGTTTCCGCCCCAGAGCCGAGGTCAGG  | 12,127 |
| TTTTTTTTAGTGCGTACCTCTCCCTTTTTTTTT | 12,143 |
| GAGGCGGCTTTTTTTTTTTTTTTTACGCTTAG  | 14,15  |
| CGAATCAAGTATAACCTAACCTGGATAGGACA  | 14,31  |
| AGTACGACTATGTGATGATAGCTGGGATATCG  | 14,47  |
| ATATCAAGTTGCTTTAAGTTCGTATATGCTCT  | 14,63  |
| CACCTGAGGTCCCTCAGGTCAGAACTGCTCTA  | 14,79  |
| AATGATTAAGTGTAGGATACTTTGAAAAGGC   | 14,95  |
| ATGTAGCAGGAGCACTCATAGGTATTCATAAC  | 14,111 |



ACTGTACGAGAACTGATGAACACCCCGCTGC  
TTTTTTTGGTTGGTTAGATTGTATTTTTTTT

14,127  
14,143

## S4.7 XY-4H×4H×192B-cuboid crystal sequences

|                                   |        |
|-----------------------------------|--------|
| CCAGGTTAAGTGGCTCAATCATACTCACGGTT  | 1,23   |
| AACTGTTGTGTCCTATGTTACTTAGGGATGG   | 1,39   |
| TACGAACTCAACGCACGCTCGGGTAGTCTCAA  | 1,55   |
| GAAGATAGAGAGCATAAATTCGCTAAACCGGA  | 1,71   |
| AAAGTATCCGCATCTCACTCAGTGATCGAGTA  | 1,87   |
| TTCATGTCGCCTTTTCGAACGGTGACACACTT  | 1,103  |
| GTGTTCAITCAGAGTAGCGGAAAATATGGCCGC | 1,119  |
| TTCGGTGCGCAGCGGGCCGCTGTAACGCTTA   | 1,135  |
| ATCAGCCCCGGGCTTTTGCTAATACGCTGAGCG | 1,151  |
| ATGCTGTTGTTGCGGGGTTTCTGAACCGGAAC  | 1,167  |
| CCGGGCTAATGAAGCCGTGACCCAGAGACTG   | 1,183  |
| TCTGATGCACCGGGAGCCAGCCACTTAGCTGT  | 1,199  |
| GTCAGTGTGATCGCGAGTTCCTCTAGCTAGG   | 3,23   |
| GTGATGCCAAAAGGGTGGATATGGAGCTGGAA  | 3,39   |
| CGGCTCTGATTTCTAGTGACCTGGTATAATGG  | 3,55   |
| CGGAGCTACCTGACCTCAATCATACTGCCAC   | 3,71   |
| GGAAGGATTATCCCTTTAAGAATGATCGCA    | 3,87   |
| CAGTCTTTGAGATGTTGAACATCTTTGGTTG   | 3,103  |
| GCGTAAAGATCTCGCATTCTGGTGCCAAAAC   | 3,119  |
| GCCGACTCGTTCAAGCACTATTATCTGGCTAT  | 3,135  |
| AAAAGATGTCTGTCAGCCCAAGCTTAGCATAA  | 3,151  |
| GCGGCTGGACGACCCCGCGTGCGACGACTGA   | 3,167  |
| CCGTGAGCCCTGCGCGACAAACGCATATCCT   | 3,183  |
| CGGCCCGCCAAATTAATAGTCGATTACGCTTC  | 3,199  |
| GCCTAAAGGTCTTCACGGTAATCGGGGGTG    | 5,23   |
| ACTCCGGCCTCCTTGGTATATTAGCTTACCCA  | 5,39   |
| CTCGCGTGGCACGTCTACGACTCGTCGAACGA  | 5,55   |
| GGACTGTTCTACATAGTGACTTGGACGAGGTT  | 5,71   |
| TCACTGGGCGCTATACAGGAAACTCGAGGGGC  | 5,87   |
| TCCCTGTCTGTCGAGCCCAGCGACCACTTCTG  | 5,103  |
| GAGAAAGATGCGGTGGCAGTAGTTGTGATTAG  | 5,119  |
| CTTGGGGGTGATATACCTCACTAAACTCCTTC  | 5,135  |
| TAATGTGACTAAGCGTAACTCCAAAGGAAAC   | 5,151  |
| CAGCTATCCATATTCGATGTAAGCGGACATC   | 5,167  |
| TATGCGCCCGATATCCGTTCAAACCTAGGGGGC | 5,183  |
| TTCTGACCAAAGCTCATGAGAATGTAAACAG   | 5,199  |
| GAACAGCTTAGAGCAGTCAAGTTCGGATACGC  | 7,23   |
| TACCTATGGACGGGATATGCGACACCATGAT   | 7,39   |
| CCGGATGAGTTATGAAGATCGTCATTGGGATA  | 7,55   |
| TACAATCTCGAAGTAAAGCATAGCACCCCTGCG | 7,71   |
| AAGATAGGGTCACAGCAGTAATACCTTACCT   | 7,87   |
| TGTTGGACGTAAGCGTGAAATAACGACCAGAA  | 7,103  |
| AGCACGAGGATTATCACGTGTACCTCGAAATA  | 7,119  |
| ATCGTTAGTTTCTCGACTGTTCCGAAACAGGC  | 7,135  |
| AGCGGTAGCCTCCCACTTAACCTATGCCTTGG  | 7,151  |
| TAACTGATTTTCTCCTGGTCCGCTAGCTGAT   | 7,167  |
| CTATGGTCTTAATATAACCCTCGGAGGCAAG   | 7,183  |
| GGGAGAGGGTGAAACAGGCCACCTGGCTCGGG  | 7,199  |
| GAGTGCCCCCTCGGCAGCCGCCTCGGTTATAC  | 9,23   |
| TCGTCAAGCCTGCTTTCCATAGCTAACCCGAT  | 9,39   |
| TGTGCATTCCACGTGAGTCGTAATAAGCAA    | 9,55   |
| ACGTGGGAGTGCCCCGAGCGTCTGAGGTATGGT | 9,71   |
| TTACCCACTATGTTGTCTCAAGTGCTAACAGT  | 9,87   |
| ACTAATTATCCATAACTGTGCACGTACGGGAT  | 9,103  |
| TCTACCCGGTGGCCGTTGCTACATCAGTTTCT  | 9,119  |
| TTGCACTCCTGGGGAAACTATACTTACGCACT  | 9,135  |
| GGTTTGGAGGGATTAGGCAATTGCTAGGTTGC  | 9,151  |
| ATTGTAGGCACAATTTTGATTGATCACATA    | 9,167  |
| CATGGGCAATAAAGCTGTAGCCTGAGGCGCGC  | 9,183  |
| AGCTGCACCGTGTACCTTGATATTGAGGGAC   | 9,199  |
| ACCTCGTCATTCGGATAAACCATACTGAGGGC  | 11,23  |
| AGTGGGCGAGATCGGCTAATCATTAGTGCTCC  | 11,39  |
| CTTAGTTAGTTCATAGTTCATTAGGGGCGGAA  | 11,55  |
| ATGGGCTGGTGCCCCACGTACAGTAACCAACC  | 11,71  |
| GGTGACTGTGGGTAGGGCCGAGCGCTGGGC    | 11,87  |
| TTACATGTGCAAGTGAATATATGACTTGGTG   | 11,103 |

|                                   |        |
|-----------------------------------|--------|
| GACCAGATCTGCTAGAAAACCAACATCCTC    | 11,119 |
| CTTGACACCTTCAATTTTAGTAAACACCCA    | 11,135 |
| ACAGAGCTGAACTTCCCATGGTCGTTCTACTG  | 11,151 |
| TCGTATGATCATAGGATCAAATAACAGC      | 11,167 |
| GTACCGCCAGTCTTGTCTTATTGGCGATCG    | 11,183 |
| TGCATTCCAATGTTTGTATGGCCGCGTGGCTTA | 11,199 |
| TAAAGACGGCCGGTGAACACATAAAAGTCGT   | 13,23  |
| CCGCCTCCGGTAGTCAACGCGGAACGTAATGG  | 13,39  |
| CAGAAAGTCTATACCCGACAAAAACAGATTG   | 13,55  |
| TACCGGGGTGAACAGCAGTGC GGCTTCTCCT  | 13,71  |
| GTATCGCCTTGTGTATTATACTTTCGGGGG    | 13,87  |
| GGTCGAGCGCTCCACTGTAGTGGCCGGCCATC  | 13,103 |
| GTGGACTAGAAAGCGCCGCAATCTGAATATC   | 13,119 |
| GCTACCTCCGATACGCGAACAGAACCATTTA   | 13,135 |
| AGAGTAGGGGCAGTGTCTAGCCAAACAGTGGG  | 13,151 |
| ACATCTCGGAAAGGTGTCCCAAGTGAAGTAA   | 13,167 |
| AAAAGGAATTATGAGATCATGTGGGATCCTAA  | 13,183 |
| AGTTTCTGGTAGACCTCGTAGGCTAGAGCGGT  | 13,199 |
| GATATCCACGGTACATTCGTTTACTGCACGGA  | 15,23  |
| ACGAGAGTGTGGCATAAGCAAGAGAAAACCTA  | 15,39  |
| ACTTGGGGACTAAGATCGTTGCGAATTTTCGC  | 15,55  |
| GCGATTTCGCATGTAGCCGAACGAGATCGTCCT | 15,71  |
| AGACGACGGATCTCTGCATGCCGGTAGCACC   | 15,87  |
| GTCAAATATGCGTGCTTTAACGCTTAGACC    | 15,103 |
| CAGCTTGACGCAAGACGCTAATCACTGGGCAG  | 15,119 |
| GGTCCTAGGTTGCAGAAACCTACCCCTAAGC   | 15,135 |
| AGCGTAGTAAGGGTTACAAGTTCCTGCGGCGG  | 15,151 |
| CTGTACGAATGAGTCCGGCCTTGACATGACAT  | 15,167 |
| TCTCCACCCGTCCAACACCAGCAGGATGTCG   | 15,183 |
| AGCCCAAACTTGACAGTAGTACAGTATCTTT   | 15,199 |
| GTATGATTTTTTTTTTTTTTTTTATGTACC    | 0,15   |
| CCATATCCAACCGTGAAGCTGTTCTCCCGTC   | 0,31   |
| ACCCGAGCTTCCAGCTACTCTCGTATCTTAGT  | 0,47   |
| TATGATTGTTGAGACTTCATCCGGTACTTCCG  | 0,63   |
| CACTGAGTGTGGGACGCGAATCGCAGGAGATC  | 0,79   |
| AGATGTTCTACTCGATCCTATCTACGCTTAC   | 0,95   |
| ATTTCCGCCAACCAAAATATTTGACGCTTGCG  | 0,111  |
| ATAATAGTGGGCCATCTCGTGCTTCGAGAAA   | 0,127  |
| GTATTAGCATAGCCAGCTAGGACCTAACCCCT  | 0,143  |
| CGCACGGCCGCTCAGCCTACCGCTAGGAGAAA  | 0,159  |
| GGGGTCACTCAGTCGTTTCGTACAGTTGGACGG | 0,175  |
| ATCGACTACAGTCTCTGACCATAGTGTTCAC   | 0,191  |
| TTTTTTTTGAAGCGTATGTGGGCTTTTTTTTT  | 0,207  |
| GAGGGAACTTTTTTTTTTTTTACACCGGC     | 2,15   |
| AAGTAAACCCTAGCTACTTTAGGCCAAAGGAG  | 2,31   |
| CCAGGTCACCATCCCTGGAGGCGGGGTATAG   | 2,47   |
| AGCGAATTCCATTATACACGCGAGCTATGTAG  | 2,63   |
| TTCTTAAATCCGGTTTCCCGGTAATACACAA   | 2,79   |
| CACCGTTCTGCGATCACCCAGTGAGCTCGACA  | 2,95   |
| CACCAGAAAAGTGTGTGCTCGACCGCGCTTTC  | 2,111  |
| ACAGGCGGAGTTTTGGTCTTTCCTGTATATCA  | 2,127  |
| AGCTTGGGTAAGCGTTGAGGTAGCGCACTGCC  | 2,143  |
| TCAGAACTTATGCTATCACATTAGAATATGG   | 2,159  |
| CGTTTGTGCTTCCGGTTCGAGATGTTCTCATAA | 2,175  |
| GTGGCTGGAGGATATGGGCGCATATGAGCTTT  | 2,191  |
| TTTTTTTTACAGCTAACAGAACTTTTTTTTT   | 2,207  |
| GAACCTGATTTTTTTTTTTTTTTCGCGATC    | 4,15   |
| CTAATATAGCGTATCCGACGAGGTGCCGATCT  | 4,31   |
| TGACGATCTGGGTAAGGGCATCACCTAGAAAT  | 4,47   |
| CCAAGTCATATCCAATAACTAAGTGGGGCAC   | 4,63   |
| GTATTACTAACCTCGTTAGCTCCGGGGATGA   | 4,79   |
| GTCGCTGGAGGTAGAGGGTACACCTCACTTGC  | 4,95   |
| GGTACACGCAGAAGTAAAAGACTGTGCGAGAT  | 4,111  |
| TTAGTGAGTATTCGAATCTGGTCATTGAAAAG  | 4,127  |
| TAGGTTAAGAAGGAGTGAGTCCGGCTGACAGA  | 4,143  |
| CTTACATCCAAGGCAAGCTCTGTTCTATGA    | 4,159  |
| CGAGGGTTGATGTCCGCCAGCCGCGCAGGG    | 4,175  |
| AATTCTCACTTGCCCTCGCGGTACCAACATT   | 4,191  |

|                                   |        |
|-----------------------------------|--------|
| TTTTTTTTCTGTTTACGCGGGCCGTTTTTTTT  | 4,207  |
| ATTACCGTTTTTTTTTTTTTTTTTGAGCCACT  | 6,15   |
| GTCGCATACACCCCGGGGCACTCAAAGCAGG   | 6,31   |
| CGAGTCGTATCATGGTCAACAGTTGTGCGTTG  | 6,47   |
| GCTATGCTTCGTTCGAAATGCACATCGGGCAC  | 6,63   |
| AGTTTCCTCGCAGGGTCTATCTTCGAGATGCG  | 6,79   |
| GTTATTTCGCCCTCGGTGGGTAAGTTATGGA   | 6,95   |
| AACTACTGTTCTGGTCGACATGAATACTCTGA  | 6,111  |
| CGAACAGCTAATACCCGGTGAGATTCCCCAG   | 6,127  |
| TGGAGTTAGCCTGTTTGACCGAAAAAGCCC    | 6,143  |
| GCGGAACCGTTTCCTTTCCAAACCAATTGTG   | 6,159  |
| GTTTGAACATCAGCTAAACAGCATGGCTTCAT  | 6,175  |
| AGGTGGCCGCCCTATGCCATGGTGACACG     | 6,191  |
| TTTTTTTCCCGAGCCGATCAGATTTTTTTT    | 6,207  |
| GAGGCGGCTTTTTTTTTTTTTTCTGCTCTA    | 8,15   |
| AATGATTAGTATAACCTGGATATCATGCCAGC  | 8,31   |
| AGTACGACGGAGCACTCATAGGTATTCATAAC  | 8,47   |
| ACTGTACGTTGCTTTACCCCAAGTGCTACATG  | 8,63   |
| CACTTGAGGGTGGTTAGATTGTAGCTGTGAC   | 8,79   |
| CATATATTACTGTTAGCGTCGCTAGCACGCA   | 8,95   |
| ATGTAGCAGACCAAGTGCCAACATGATAATC   | 8,111  |
| TACTAAAAAGAAACTGTCAAGCTGTCTGCAAC  | 8,127  |
| GCAATTGCTGGGTGTTCTAACGATGTGGGAGG  | 8,143  |
| TAGTTTGAGCAACCTAACTACGCTGGACTCAT  | 8,159  |
| CAGGCTACGCTGTATTATCAGTTAATATTAAG  | 8,175  |
| GCGGCCATGCGCGCTGTGGGAGATGTCAAGT   | 8,191  |
| TTTTTTTTTAAAGCCACCCTCCCTTTTTTTT   | 8,207  |
| TATGGTTTTTTTTTTTTTTTTTTTGGAAAGGAC | 10,15  |
| AGCTATGGGCCCTCAGCGTCTTAATGACTACC  | 10,31  |
| CTAATGAAATCGGGTTGCCGGAGTAGACGTGC  | 10,47  |
| TCAGACGCTTCCGCCCACTTCTGGCTGTTCA   | 10,63  |
| CTCGGCCACCATACCAACAGTCCGTATAGCG   | 10,79  |
| CGTGCACAGCCCAGCGGGCGATACAGTGGAGC  | 10,95  |
| TGGTGGTTATCCCTGAGACAGGGACCACCGCA  | 10,111 |
| AGTATAGTGAGGATGTTAGTCCACGCGTATCG  | 10,127 |
| CGACCATGAGTGCGTACCCCAAGACGCTTAG   | 10,143 |
| CGAATCAACAGTAGAACCTACTCTCACCTTC   | 10,159 |
| AATAAGGATATGTGATGATAGCTGGGATATCG  | 10,175 |
| ATATCAAGCGATCGCCTTCCTTTTAGGTCTAC  | 10,191 |
| TTTTTTTTGTCCCTCAGGTCAGAATTTTTTTT  | 10,207 |
| GTAACGATTTTTTTTTTTTTTTTATCCGAAT   | 12,15  |
| TTCCGCTTCCGTGCAACACTGACACCCTTTT   | 12,31  |
| TCGCAACGCCATTACGCGCCCACTCTATGAAC  | 12,47  |
| CCGCACGTGCGAAAATCAGAGCCGAGGTCAGG  | 12,63  |
| CGGCATGCAGGAGAAGCAGCCATTACCCACA   | 12,79  |
| GCCACTACGGTGCTACATCTTCCAACATCTC   | 12,95  |
| TGATTAGCGATGGCCGACATGTAATCTAGCAG  | 12,111 |
| TCTGGTTCCCTGCCAGCTTACGCGCTTGAAC   | 12,127 |
| GGAACTTGAAATGGTGTGTC AAGGGAAGTTC  | 12,143 |
| ACTTGGGACCGCCGCACATCTTTGGGGTCTG   | 12,159 |
| TGCTGGTGTACTTGCTCATAACGACAAGAACT  | 12,175 |
| AGCCTACGCGACATCCCTCGACGGTTAATTG   | 12,191 |
| TTTTTTTTACCGCTCTGGAATGCATTTTTTTT  | 12,207 |
| ATGTGGTTTTTTTTTTTTTTTTTTGCCGAGG   | 14,15  |
| TCTTGCTTACGACTTTTAACTGGATAGGACA   | 14,31  |
| TTTTGTCTAGGTTTCCTTGACGATCACGTGG   | 14,47  |
| CTCGTTCGCAAATCTGAGTTCGTATATGCTCT  | 14,63  |
| AGAGTATAAGGACGATTCACGTAACAATA     | 14,79  |
| GCGTAAACCCCGCAGATACTTTGAAAAGGC    | 14,95  |
| GATTGCCGGGTCTAAATAATAGTACGGCCAC   | 14,111 |
| GGTAGGTTGATATCAATGAACACCCCGCTGC   | 14,127 |
| TTGGCTGAGCTTAGGGGAGTGCAACTAATCCC  | 14,143 |
| TCAAGGCCCCCACTGTGGGCTGATCCCGCAAC  | 14,159 |
| CCACATGAATGCATGCCTACAATAGCTTTAT   | 14,175 |
| TGTACTACTTAGGATCTAGCCCGGCTCCCGGT  | 14,191 |
| TTTTTTTTAAAGATACGTGCAGCTTTTTTTTT  | 14,207 |

## S4.8 XY-4H×4H×256B-cuboid crystal sequences

|                                   |       |
|-----------------------------------|-------|
| CCAGGTTAAGTGGCTCAATCATACTCACGGTT  | 1,23  |
| AACTGTTGTGCTATGTTACTTAGGGATGG     | 1,39  |
| TACGAACTCAACGCACGCTCGGGTAGTCTCAA  | 1,55  |
| GAAGATAGAGAGCATAAATTCGCTAAACCGGA  | 1,71  |
| AAAGTATCCGCATCTCACTCAGTGATCGAGTA  | 1,87  |
| TTCATGTCGCCTTTTCGAACGGTGACACACTT  | 1,103 |
| GTGTTCAITCAGAGTAGCGGAAAATATGGCCGC | 1,119 |
| TTCGGTGCGCAGCGGGCCGCTGTAACGCTTA   | 1,135 |
| ATCAGCCCCGGGCTTTTGCTAATACGCTGAGCG | 1,151 |
| ATGCTGTTGTTGCGGGGTTTCTGAACCGGAAC  | 1,167 |
| CCGGGCTAATGAAGCCGTGACCCAGAGACTG   | 1,183 |
| TCTGATGCACCGGGAGCCAGCCACTTAGCTGT  | 1,199 |
| GTCAGTGTGATCGCGAGTTCCTCTAGCTAGG   | 1,215 |
| GTGATGCCAAAAGGGTGGATATGGAGCTGGAA  | 1,231 |
| CGGCTCTGATTTCTAGTGACCTGGTATAATGG  | 1,247 |
| CGGAGCTACCTGACCTCAATCATACTGCCAC   | 1,263 |
| GGAAGGATTCATCCCTTTAAGAATGATCGCA   | 3,23  |
| CAGTCTTTGAGATGTTGAACATCTTTGGTTG   | 3,39  |
| GCGTAAAGATCTCGATTCTGGTGCCAAAAC    | 3,55  |
| GCCGACTCGTTCAAGCACTATTATCTGGCTAT  | 3,71  |
| AAAAGATGTCTGTCAGCCCAAGCTTAGCATAA  | 3,87  |
| GCGGCTGGACGACCCCGCGTGCGACGACTGA   | 3,103 |
| CCGTGAGCCCTGCGCGACAAAACGCATATCCT  | 3,119 |
| CGGCCCGCCAAATTAATAGTCGATTACGCTTC  | 3,135 |
| GCCTAAAGGTCTTCACGGTAATCGGGGGTG    | 3,151 |
| ACTCCGGCTCCTTGGTATATTAGCTTACCCA   | 3,167 |
| CTCGCGTGGCACGCTACGACTCGTCGAACGA   | 3,183 |
| GGACTGTTCTACATAGTGACTTGGACGAGGTT  | 3,199 |
| TCACTGGGCGCTATACAGGAAACTCGAGGGGC  | 3,215 |
| TCCCTGTCTGTCGAGCCCAGCGACCACTTCTG  | 3,231 |
| GAGAAAGATGCGGTGGCAGTAGTTGTGATTAG  | 3,247 |
| CTTGGGGGTGATATACCTCACTAAACTCCTTC  | 3,263 |
| TAATGTGACTAAGCGTAACTCCAAAGGAAAC   | 5,23  |
| CAGCTATCCATATTCGATGTAAGCGGACATC   | 5,39  |
| TATGCGCCCGATATCCGTTCAAACCTAGGGGGC | 5,55  |
| TTCTGACCAAAGCTCATGAGAATTGTAAACAG  | 5,71  |
| GAACAGCTTAGAGCAGTCAAGTTCGGATACGC  | 5,87  |
| TACCTATGGACGGGATATGCGACACCATGAT   | 5,103 |
| CCGGATGAGTTATGAAGATCGTATTGGGATA   | 5,119 |
| TACAATCTCGAAGTAAAGCATAGCACCCCTGCC | 5,135 |
| AAGATAGGGTCACAGCAGTAATACCTTACCT   | 5,151 |
| TGTTGGACGTAAGCGTGAAATAACGACCAGAA  | 5,167 |
| AGCACGAGGATTATCACGTGTACCTCGAAATA  | 5,183 |
| ATCGTTAGTTTCTCGACTGTTCCGAAACAGGC  | 5,199 |
| AGCGGTAGCCTCCCACTTAACCTATGCCTTGG  | 5,215 |
| TAACTGATTTTCTCCTGGTCCGCTAGCTGAT   | 5,231 |
| CTATGGTCTTAATATAACCCTCGGAGGCAAG   | 5,247 |
| GGGAGAGGGTGAAACAGGCCACCTGGCTCGGG  | 5,263 |
| GAGTGCCCCCTCGGCAGCCGCCTCGGTTATAC  | 7,23  |
| TCGTCAAGCCTGCTTTCCATAGCTAACCCGAT  | 7,39  |
| TGTGCATTCCACGTGAGTCGACTTAAAGCAA   | 7,55  |
| ACGTGGGAGTGCCCGAGCGTCTGAGGTATGGT  | 7,71  |
| TTACCCACTATGTTGTCTCAAGTGCTAACAGT  | 7,87  |
| ACTAATTATCCATAACTGTGCACGTACGGGAT  | 7,103 |
| TCTACCCGGTGGCCGTTGCTACATCAGTTTCT  | 7,119 |
| TTGCACTCCTGGGGAAACTATACTTACGCACT  | 7,135 |
| GGTTTGGAGGGATTAGGCAATTGCTAGGTTGC  | 7,151 |
| ATTGTAGGCACAATTTTGATTGATCACATA    | 7,167 |
| CATGGGCAATAAAGCTGTAGCCTGAGGCGCGC  | 7,183 |
| AGCTGCACCGTGTACCTTGATATTGAGGGAC   | 7,199 |
| ACCTCGTCATTCGGATAAACCATACTGAGGGC  | 7,215 |
| AGTGGGCGAGATCGGCTAATCATTAGTGCTCC  | 7,231 |
| CTTAGTTAGTTCATAGTTCATTAGGGGCGGAA  | 7,247 |
| ATGGGCTGGTGGCCACGTACAGTAAACCAACC  | 7,263 |
| GGGTACCTGTGGGTAGGGCCGAGCGCTGGGC   | 9,23  |
| TTACATGTGCAAGTGAATATATGACTTGCTC   | 9,39  |

|                                   |        |
|-----------------------------------|--------|
| GACCAGATCTGCTAGAAAACCAACATCCTC    | 9,55   |
| CTTGACACCTTCAATTTTAGTAAACACCCA    | 9,71   |
| ACAGAGCTGAACTTCCCATGGTCGTTCTACTG  | 9,87   |
| TCGTATGATCATAGGATCAAACATAAATACAGC | 9,103  |
| GTACCGCCAGTCTTGTCCCTATTGGCGATCG   | 9,119  |
| TGCATTCCAATGTTTGATGGCCGCGTGGCTTA  | 9,135  |
| TAAAGACGGCCGGTGAACACATAAAAGTCGT   | 9,151  |
| CCGCCTCCGGTAGTCAACGCGGAACGTAATGG  | 9,167  |
| CAGAAAGTCTATACCCGACAAAAACAGATTG   | 9,183  |
| TACCGGGGTGAACAGCAGTGCAGGCTTCTCCT  | 9,199  |
| GTATCGCCTTGTGTATTATACTTTGCGGGGG   | 9,215  |
| GGTCGAGCGCTCCACTGTAGTGGCCGCCATC   | 9,231  |
| GTGGACTAGAAAGCGCCGCAATCTGAATATC   | 9,247  |
| GCTACCTCCGATACGCGAACAGAACCATTTA   | 9,263  |
| AGAGTAGGGGCAGTGTCTAGCCAAACAGTGGG  | 11,23  |
| ACATCTCGGAAAGGTGTCCCAAGTGAAGTAA   | 11,39  |
| AAAAGGAATTATGAGATCATGTGGGATCCTAA  | 11,55  |
| AGTTTCTGGTAGACCTCGTAGGCTAGAGCGGT  | 11,71  |
| GATATCCACGGTACATTCGTTTACTGCACGGA  | 11,87  |
| ACGAGAGTGTGGCATAAGCAAGAGAAAACCTA  | 11,103 |
| ACTTGGGGACTAAGATCGTTGCGAATTTTCGC  | 11,119 |
| GCGATTTCGCATGTAGCCGAACGAGATCGTCT  | 11,135 |
| AGACGACGGATCTCCTGCATGCCGGTAGCACC  | 11,151 |
| GTCAAATATGCGTGCTTTAACGCTTAGACC    | 11,167 |
| CAGCTTGACGCAAGACGCTAATCACTGGGCAG  | 11,183 |
| GGTCCTAGGTTGCAGAAACCTACCCCTAAGC   | 11,199 |
| AGCGTAGTAAGGGTTACAAGTTCCTGCGGCGG  | 11,215 |
| CTGTACGAATGAGTCCGGCCTTGACATGACAT  | 11,231 |
| TCTCCACCCGTCCAACACCAGCAGGATGTCG   | 11,247 |
| AGCCCAAACTTGACAGTAGTACAGTATCTTT   | 11,263 |
| TTTCATGGCGGCGATGTCGCCGTTTGTCTCGG  | 13,23  |
| TGCGTACGGCTTTATATAGCGTAGACCGGAC   | 13,39  |
| AACCCCGTAAATCGTAAGAGTCGTTATGCCCC  | 13,55  |
| CCGGTCTGCTAGAGTGGGACTGGATCAGATG   | 13,71  |
| TTCAAGTATTCGGTGACCTCCCCGATTACAA   | 13,87  |
| CGCGTTACCAAGTAACGTATGTACGACGCGA   | 13,103 |
| TGCGAGTGAACGGGTGGATGAATTTTCGTTCCG | 13,119 |
| GGCCAGGCGATCTAAGTCTGGCGCGTGAGGAC  | 13,135 |
| ACGTAAGTTGAAGTAGGAAGCTTTTCTAGCC   | 13,151 |
| ATAGCATCGACACTACGACCTGCTTTTCGACA  | 13,167 |
| CGGACTGCATTCTGGACAGTAACTGCATTAAC  | 13,183 |
| TACGTGCTCCCAACATAAGTGACGTCTCAGC   | 13,199 |
| AGTTGAAAATTATCTCGATAAGCAGAAGGACC  | 13,215 |
| TGTATAACTGGCAAGAGACAAGGCCGCTTCAG  | 13,231 |
| AAAGGATAGCCGGACCGTATTAATGCCGCGCC  | 13,247 |
| AACGGTTTCCCGACCTAGTGTCTATCAAGTC   | 13,263 |
| TATTCATGAAACCATTCTCGGGTTCGAGCGGG  | 15,23  |
| TCACTGTTGTGACCTACGAGAAGCGTATAGAT  | 15,39  |
| GTCCGCGCGAATAGCTCACAGGCGAACTACC   | 15,55  |
| TATGAATTGGTTTAAACGCTCCTCGGGAATTA  | 15,71  |
| ATACGACAGGTGGCAAACCACTCCGATGTCA   | 15,87  |
| GCGCCGCATACCCATTCACTGTGAATTTCCAC  | 15,103 |
| ACCGAGGATTCGCAGGTCCATGGGATTCACCA  | 15,119 |
| AGCTCGTATACACCCTGATCTCCATGGCAGC   | 15,135 |
| GCTTCGGTACAGGTCTGAACTGGTAGATCACC  | 15,151 |
| ATTAGTGTACCCAGCAGTTCGGCTCCCTGTG   | 15,167 |
| GACTCGGGATAACCCGGTCGTCGTGAATGCTG  | 15,183 |
| TTCCGGGGTAAATCAAGCTTTATAAATCCCG   | 15,199 |
| ACGCTCTGTTCCAAACTTTAGACCCCGCCGT   | 15,215 |
| AATCTCGGATTCCTTAAAAACCAGGCGCAATC  | 15,231 |
| TCATGGCATAAACGAAACCCAATCATACGAGC  | 15,247 |
| GTGGAGGGAAGTTATTCTACTGGCGTTTTTCAT | 15,263 |
| GTATGATTTTTTTTTTTTTTTTTTATGGTTTC  | 0,15   |
| AGATGTTCAACCGTGAGGGCACTCAAAGCAGG  | 0,31   |
| ACCCGAGCCAACCAAAAACAGTGAGCTATTCG  | 0,47   |
| ATAATAGTTTGAGACTAATGCACATCGGGCAC  | 0,63   |
| CACTGAGTATAGCCAGAATTCATATTGCCACC  | 0,79   |
| CGCACGGCTACTCGATGTGGGTAAGTTATGGA  | 0,95   |

|                                   |       |
|-----------------------------------|-------|
| ATTTCCGCTCAGTCGTTGCGGCGCCCTGCGAA  | 0,111 |
| ATCGACTAGCGGCCATCGGTGAGATTCCCCAG  | 0,127 |
| GTATTAGCGAAGCGTATACGAGCTAGACCTGT  | 0,143 |
| CTAATATACGCTCAGTCCAAACCAAATTGTG   | 0,159 |
| GGGGTCACTGGGTAAAGACACTAATCCGGGTAT | 0,175 |
| CCAAGTCACAGTCTCTTGCCCATGGTGACACG  | 0,191 |
| GAGGGAACAACCTCGTCCCCGGAAGTTTGAA   | 0,207 |
| GTCGCTGGCCTAGCTAGACGAGGTGCCGATCT  | 0,223 |
| CCAGGTCACAGAAGTGCCGAGATTTTCGTTA   | 0,239 |
| TTAGTGAGCCATTATATAACTAAGTGGGGCAC  | 0,255 |
| TTTTTTTTGAAGGAGTCCCTCCACTTTTTTTT  | 0,271 |
| TTCTAAAATTTTTTTTTTTTTTTCATCGCCG   | 2,15  |
| AAGTAAACTGCGATCATCACATTAGAATATGG  | 2,31  |
| CACCAGAACCATCCCTCGTACGCATACGATTT  | 2,47  |
| AGCGAATTAGTTTTGGGGCGCATATGAGCTTT  | 2,63  |
| AGCTTGGGTCCGGTTTAGAACCGGTCACCGAA  | 2,79  |
| CACCGTTCTATGCTAAGCTGTTCTCCCCGTC   | 2,95  |
| CGTTTGTCAAGTGTGTTAAGCGCGCACCCGTT  | 2,111 |
| ACAGGCGGAGGATATGTCATCCGTTACTTCG   | 2,127 |
| ATTACCGTTAAGCGTTGCGCTGGCCCTACTTCA | 2,143 |
| TCAGAAACCACCCCGCCTATCTTACGCTTAC   | 2,159 |
| CGAGTCGTGTTCCGGTGATGCTATTCCAGAAAT | 2,175 |
| GTGGCTGGTTCGACTCGTGTCTCGAGAAA     | 2,191 |
| AGTTTCTACAGCTAAAGCACGTAGAGATAAT   | 2,207 |
| CCATATCCGCCCTCGCTACCGCTAGGAGAAA   | 2,223 |
| AACTACTGTTCCAGCTGTTATACAGGTCCGGC  | 2,239 |
| TATGATTGCTAATCACGACCATAGTGTTCAC   | 2,255 |
| TTTTTTTTGTGGGACGAAACCGTTTTTTTTTT  | 2,271 |
| GAGGCGGCTTTTTTTTTTTTTTTGGGGATGA   | 4,15  |
| CTTACATCGTATAACCCTACTCTCACCTTC    | 4,31  |
| AGTACGACGATGCCGAAAGACTGTGCGAGAT   | 4,47  |
| AATTCTCATTGCTTTATTCCTTTTAGGCTAC   | 4,63  |
| CACCTGAGCTGTTACGAGTCGGCCTGACAGA   | 4,79  |
| GTCGCATAACTGTTAGTGGATATCATGCCAGC  | 4,95  |
| ATGTAGCAATCATGGTCCAGCCGCGCGCAGGG  | 4,111 |
| GCTATGCTAGAAACTGCCCAAGTGCTACATG   | 4,127 |
| GCAATTGCCGCAAGGTTGCGGGCCGGGAAGGAC | 4,143 |
| GTTATTTGCAACCTACGTCGTCTAGCACGCA   | 4,159 |
| CAGGCTACTTCTGGTCGCCGAGTAGACGTGC   | 4,175 |
| CGGAACAGGCGCGCCTCAAGCTGTCTGCAAC   | 4,191 |
| TATGGTTTGCCTGTTAACAGTCCGTATAGCG   | 4,207 |
| GCGGAACCGCCCTCAGACTACGCTGGACTCAT  | 4,223 |
| CTAATGAAATCAGCTAGACAGGGACCACCGCA  | 4,239 |
| AGGTGGCCTTCCGCCCGTGGGAGATGTCAAAT  | 4,255 |
| TTTTTTTTCCCGAGCCCCCAAGTTTTTTTTT   | 4,271 |
| TGGAGTTATTTTTTTTTTTTTTTGAGCCACT   | 6,15  |
| AGCTATGGGTTTCTTGGTACACCTCACTTGC   | 6,31  |
| GTTTGAACATCGGGTTCAACAGTTGTGCGTTG  | 6,47  |
| TCAGACGCGCCCCCTAATCTGGTCATTGAAAG  | 6,63  |
| GAAC TTGAACCATACCCTATCTTCGAGATGCG | 6,79  |
| CGTGACACAGCGTATCCAGCTCTGTTCTATGA  | 6,95  |
| TGACGATCATCCCTGAGACATGAATACTCTGA  | 6,111 |
| AGTATAGTTATCCCAAGGCGGTACCAAACATT  | 6,127 |
| GTATTACTAGTGCGTAGACCGAAAAAGCCC    | 6,143 |
| CGAATCAAAGGTAGAGCGTCTTAATGACTACC  | 6,159 |
| GGTACACGTATGTGATAACAGCATGGCTTCAT  | 6,175 |
| ATATCAAGTATTTCGAACTTTCTGGCTGTTCA  | 6,191 |
| TAGGTTAAGTCCCTCAGCATCAGATCGCGATC  | 6,207 |
| AATGATTACCAAGGCAGGCGATACAGTGGAGC  | 6,223 |
| CGAGGGTTGGAGCACTGGCATCACCTAGAAAT  | 6,239 |
| ACTGTACGCTTGCCCTAGTCCACGCGTATCG   | 6,255 |
| TTTTTTTTGGTTGGTTTAGCTCCGTTTTTTTTT | 6,271 |
| CTCGGCCCTTTTTTTTTTTTTTTTGGCGAGG   | 8,15  |
| ACTTGGGAGCCCAGCGATAGAATATAGGTCAC  | 8,31  |
| TGGTGGTTTTACTTGCCTTGACGATCACGTGG  | 8,47  |
| AGCCTACGGAGGATGTCGCGGAACTTAAACC   | 8,63  |
| CGACCATGACCGCTCTTCCACGTACAACATA   | 8,79  |
| TCTTGCTTCAGTAGAATGTCGTATAATGGGTA  | 8,95  |

|                                   |        |
|-----------------------------------|--------|
| AATAAGGATAGGTTTCTAATAGTACGGCCAC   | 8,111  |
| CTCGTTCGCGATCGCCTCCTCGGTAGGGTGTA  | 8,127  |
| ATGTGGTTAGGACGATGAGTGCACCTAATCCC  | 8,143  |
| GCGTAAAACGACTTTACCGAAGTGCTGGGT    | 8,159  |
| TTTTTGTGGTCTAAACCTACAATAGCTTTAT   | 8,175  |
| GGTAGGTTCAAATCTGCCGAGTCTTGATTA    | 8,191  |
| AGAGTATAGCTTAGGGGTGCAGCTATCCGAAT  | 8,207  |
| TCAAGGCCCCCCCGCACAGAGCGTTAAGGAAT  | 8,223  |
| GATTGCCGATGTCATGCGCCACTCTATGAAC   | 8,239  |
| TGTAACGATATTCATGCCATGAAATAACTT    | 8,255  |
| TTTTTTTTAAAGATAACCAGCCATTTTTTTTT  | 8,271  |
| TTGGCTGATTTTTTTTTTTTTTTTACGCTTAG  | 10,15  |
| CATATATCCCCTGTCCATGAAAATAAAAAGC   | 10,31  |
| CCACATGAGACCAAGTGATAGCTGGGATATCG  | 10,47  |
| TACTAAAATTAGGATCACGGGGTACTCTAGC   | 10,63  |
| GTAACGATGGGTGTTGGTCCAGAACTGCTCTA  | 10,79  |
| TAGTTTGATCCGTGCATACTTGAATTACTTGG  | 10,95  |
| TCGCAACGGCTGTATTCATAGGTATTCATAAC  | 10,111 |
| GCGGCCATGCGAAAATCACTCGCACTTAGATC  | 10,127 |
| CGGCATGCTAAGCCACAGATTGTAGCTGTGAC  | 10,143 |
| TTCCGCGTGGTGTACACTTACGTGTAGTGTCT  | 10,159 |
| TGATTAGCCATTACGGTCCAACATGATAATC   | 10,175 |
| CCGCACGTCTGCCAGGCAGTCCGATGTTGGG   | 10,191 |
| GGAACTTGAGGAGAAGCTAACGATGTGGGAGG  | 10,207 |
| GCCACTACCCGCCGCAATTCAACTTCTTGCCA  | 10,223 |
| TGCTGGTGGATGGCCGATCAGTTAATATAAG   | 10,239 |
| TCTGGTTCGGACATCCTATCCTTTGGTCCGGG  | 10,255 |
| TTTTTTTTAAATGGTCTCTCCCTTTTTTTTT   | 10,271 |
| ACCCGAGATTTTTTTTTTTTTTTGCACTGCC   | 12,15  |
| TACGCTATCCCCTCGATCCTTCCAACATCTC   | 12,31  |
| GCCTGTGAGTCCGGTCCGAGATGTTCTCATAA  | 12,47  |
| CCAGTCCCCGTAGTTCCCTTACGCGCTTGAAC  | 12,63  |
| GAGGTGGTCATCTGATCAGAACTATGTACCG   | 12,79  |
| TACATACGTGACATCGCATCTTTGGGGTCTGT  | 12,95  |
| CCCATGGATCGCGTGCAGTCTCGTATCTTAGT  | 12,111 |
| GCGCCAGATGGTGAATCTCGACGGTTAATTTG  | 12,127 |
| ACCAGTTCGTCTCACCGAATCGCAGGAGATC   | 12,143 |
| AGCAGGTCCGGTATCTTTTAGGCCCAAGGAG   | 12,159 |
| CACGACGATGTCGAAATATTGACGTCTTGCG   | 12,175 |
| CGTCACTTCAGCATTACACGCGAGCTATGTAG  | 12,191 |
| GCTCTAAAGCTGAGGACTAGGACCTAACCCCTT | 12,207 |
| GCCTTGTACGGCCGCCCCAGTGAGCTCGACA   | 12,223 |
| GATTGGGTCTGAAGCGTCTGACAGTTGGACGG  | 12,239 |
| AGACACTAGCTCGTATTCTTCTCGTATATCA   | 12,255 |
| TTTTTTTTGACTTGATTGTGGGCTTTTTTTTT  | 12,271 |
| AACGGCGATTTTTTTTTTTTTTTTACCACA    | 14,15  |
| GCTTCTCGCGGAGCATAACCTGGATAGGACA   | 14,31  |
| ACGACTCTATCTATACACATGTAATCTAGCAG  | 14,47  |
| GAGGAGCGGGGCATAAGTTCGTATATGCTCT   | 14,63  |
| CGGGGAGGTAATCCCGTGTCAAGGGAAGTTC   | 14,79  |
| TCACAGTGTGTAATGGATACTTTGAAAAGGC   | 14,95  |
| AATTCATCGTGAAAATTCATACGACAAGAAT   | 14,111 |
| GGAGAATCCCGAACGAATGAACACCCCGCTGC  | 14,127 |
| AAAGCTTCGCTGCCATGGAATGCAACACCGGC  | 14,143 |
| AGCCGAACGGCTAGAAGGGCTGATCCCGCAAC  | 14,159 |
| AGTTACTGCACAAGGGGGAGGCGGGGGTATAG  | 14,175 |
| TATAAAGCGTTAATGCTAGCCCGGCTCCCGGT  | 14,191 |
| TGCTTATCCGGGAATCCCGGTAATACAAA     | 14,207 |
| CTGGTTTTGGTCTTCACTGACACCCTTTT     | 14,223 |
| ATTAATACGATTGCGCGCTCGACCCGCTTTC   | 14,239 |
| GCCAGTAGGGCGCGGCCAGGCCGAGGTCAGG   | 14,255 |
| TTTTTTTTATGAAAACGAGGTAGCTTTTTTTTT | 14,271 |



## S4.9 XY-32H×64B-pore crystal sequences

|                                                   |       |
|---------------------------------------------------|-------|
| CCAGGTTAAGTGGCTCAATCATACTCACGGTT                  | 1,31  |
| AACTGTTGTGCTATGTTACTTAGGGATGG                     | 1,47  |
| TACGAACTCAACGCACGCTCGGGTAGTCTCAA                  | 1,63  |
| GAAGATAGAGAGCATAAATTCGCTAAACCGGA                  | 1,79  |
| AAAGTATCCGCATCTCACTCAGTGATCGAGTA                  | 3,31  |
| TTCATGTCGCCTTTTCGAACGGTGACACACTT                  | 3,47  |
| GTGTTCAITCAGAGTAGCGGAAATATGGCCGC                  | 3,63  |
| TTCGGTGCGCAGCGGGCCGCTGTAACGCTTA                   | 3,79  |
| ATCAGCCCCGGCTTTTGCTAATACGCTGAGCG                  | 5,31  |
| ATGCTGTTGTTGCGGGGTTTCTGAACCGGAAC                  | 5,47  |
| CCGGGCTAATGAAGCCGTGACCCAGAGACTG                   | 5,63  |
| TCTGATGCACCGGAGCCAGCCACTTAGCTGT                   | 5,79  |
| GTCAGTGTGATCGCGAGTTCCTCTAGCTAGG                   | 7,31  |
| GTGATGCCAAAAGGGTGGATATGGAGCTGGAA                  | 7,47  |
| CGGCTCTGATTTCTAGTGACCTGGTATAATGG                  | 7,63  |
| CGGAGCTACCTGACCTCAATCATACTGCCAC                   | 7,79  |
| GGAAGGATTATCCCTTTAAGAATGATCGCA                    | 9,31  |
| CAGTCTTTGAGATGTTGAACATCTTTGGTTG                   | 9,47  |
| GCGTAAAGATCTCGCATTCTGGTGCCAAAAC                   | 9,63  |
| GCCGACTCGTTCAAGCACTATTATCTGGCTAT                  | 9,79  |
| AAAAGATGTCTGTCAGCCCAAGCTTAGCATAA                  | 11,31 |
| GCGGCTGGACGACCCCGCCGTGCGACGACTGA                  | 11,47 |
| CCGTCGAGCCCTGCGCGACAAACGCATATCCT                  | 11,63 |
| CGGCCCGCCAAATTAATAGTCGATTACGCTTC                  | 11,79 |
| GCCTAAAGGTCTTCACGGTAATCGGGGTGACTCCGGCCTCCTGG      | 13,47 |
| TATATTAGCTTACCCTACCTCGCGTGGCACGTCTACGACTCGTCAACGA | 13,79 |
| GGACTGTTCTACATAAGTGACTTGGACGAGGTTCACTGGGCGCTATAC  | 17,31 |
| AGGAACTCGAGGGGCTCCTGTCTGTGAGC                     | 17,47 |
| CCAGCGACCCTTCTGGAGAAAGATGCGGTGGCAGTAGTTGTGATTAG   | 17,63 |
| CTTGGGGGTGATATACCTCACTAAACTCCTTC                  | 17,79 |
| TAATGTGACTAAGCGT                                  | 19,31 |
| TAACTCAAAGGAAACCAGCTATCCCATATTCGATGTAAGCGGACATC   | 19,63 |
| TATGCGCCGATATCCGTTCAAACCTAGGGGGC                  | 19,79 |
| TTCTGACCAAAGCTCA                                  | 22,16 |
| TGAGAATTGTAAACAGGAACAGCTTAGAGCAG                  | 23,31 |
| TCAAGTTCGGATACGCTACCTATGGACGGGATATGCGACACCATGAT   | 23,47 |
| CCGGATGAGTTATGAAGATCGTCATTGGGATA                  | 23,63 |
| TACAATCTCGAAGTAAAGCATAGCACCCCTGCG                 | 23,79 |
| AAGATAGGGTCACAGCAGTAATACCTCTACCT                  | 25,31 |
| TGTTGGACGTAAGCGTGAATAACGACCAGAA                   | 25,47 |
| AGCACGAGGATTATACGTGTACCTCGAAATA                   | 25,63 |
| ATCGTTAGTTTCTCGACTGTTCCGAAACAGGC                  | 25,79 |
| AGCGGTAGCCTCCACTTAACCTATGCCTTGG                   | 27,31 |
| TAACTGATTTTCTCCTGGTTCGGTAGCTGAT                   | 27,47 |
| CTATGGTCCCTAATATAACCCTCGGAGGCAAG                  | 27,63 |
| GGGAGAGGGTGAAACAGGCCACCTGGCTCGGG                  | 27,79 |
| GAGTGCCCCCTCGGCAGCCGCTCGGTTATAC                   | 29,31 |
| TCGTCAAGCCTGCTTCCATAGCTAACCCGAT                   | 29,47 |
| TGTGCATTCACCGTGAGTCGTAATAAGCAA                    | 29,63 |
| ACGTGGGAGTGCCCGAGCGTCTGAGGTATGGT                  | 29,79 |
| TTACCCACTATGTTGTCTCAAGTGCTAACAGT                  | 31,31 |
| ACTAATTATCCATAACTGTGCACGTCAGGGAT                  | 31,47 |
| TCTACCGGTGGCCGTTGCTACATCAGTTTCT                   | 31,63 |
| TTGCACTCCTGGGAAAATACTACTACGCACT                   | 31,79 |
| GGTTTGGAGGGATTAGGCAATTGCTAGGTTGC                  | 33,31 |
| ATTGTAGGCACAATTTTGATTTCGATCACATA                  | 33,47 |
| CATGGGCAATAAAGCTGTAGCCTGAGGCGCGC                  | 33,63 |
| AGCTGCACCGTGTACCTTGATATTGAGGGAC                   | 33,79 |
| ACCTCGTCATTCGGATAAACCATACTGAGGGC                  | 35,31 |
| AGTGGGCGAGATCGGCTAATCATTAGTGCTCC                  | 35,47 |
| CTTAGTTAGTTCATAGTTCATTAGGGGCGGAA                  | 35,63 |
| ATGGGCTGGTGCCCCACGTACAGTAACCAACC                  | 35,79 |
| GTATGATTTTTTTTTTTTTTTTTTATCCGAAT                  | 0,23  |
| TCAGAAAACAACCGTGACATCTTTTGGGGTTCGT                | 0,39  |
| ACCCGAGCGTTCGGTTCGCCACTCTATGAAC                   | 0,55  |
| GTGGCTGGTTGAGACTCTCGACGGTAAATTTG                  | 0,71  |

|                                                  |       |
|--------------------------------------------------|-------|
| TTTTTTTTACAGCTAACAGCCATTTTTTTTT                  | 0,87  |
| CACTGAGTTTTTTTTTTTTTTCTAATCCC                    | 2,23  |
| AAGTAAACTACTCGATATCCTTCCAACATCTCAAAGACTGTGCGAGAT | 2,39  |
| ATTTCCGCCATCCCTCCTACAATAGCTTTAT                  | 2,55  |
| AGGGAATTGCGGCCATCTTACGCGCTTGAACGAGTCGGCTTTTTTTT  | 2,71  |
| TTTTTTTTCCGGTTGTGCAGCTTTTTTTTT                   | 2,87  |
| GTATTAGCTTTTTTTTTTTTTTACAACATA                   | 4,23  |
| CACCGTTCCGCTCAGCACACTGACACCCTTTT                 | 4,39  |
| GGGGTACAAGTGTGTTAATTAGTACGGCCAC                  | 4,55  |
| ACAGCGGCAGTCTCTCAGAGCCGAGGTCAGG                  | 4,71  |
| TTTTTTTTAAGCGTTGAGTGCAATTTTTTTT                  | 4,87  |
| AGCTGGGTTTTTTTTTTTTTTTAAAAGCCC                   | 6,23  |
| CCATATCCTTATGCTAAACAGTCCGCCCTCG                  | 6,39  |
| CGTTTGTCTCCAGCTAACAGCATGGCTTCAT                  | 6,55  |
| TATGATTGAGGATATGGTCGCTGGGTATATCA                 | 6,71  |
| TTTTTTTTGTGGGACGGCATCAGATTTTTTTT                 | 6,87  |
| AGATGTTCCCTAGCTAGAGGGAACTTTTTTTTTTTTTTTGTAGATGCG | 8,39  |
| ATAATAGTCCATTATACCAGGTCACAACCAAAGACATGAATACTCTGA | 8,71  |
| TTTTTTTATAGCCAGGCACCGAATTTTTTTT                  | 8,87  |
| TTTTTTTTGGGGATGA                                 | 9,8   |
| TTCTAAATTTTTTTTTTTTTTTGAGCCACT                   | 10,23 |
| CGCACGGCTGCGATCAATTACCGTGGAAGGAC                 | 10,39 |
| CACCAGAATCAGTCGTCAACAGTTGTGCGTTG                 | 10,55 |
| ATCGACTAAGTTTGGCACGCGAGTGGGTAAG                  | 10,71 |
| TTTTTTTTGAAGCGTACTATCTCTTTTTTTT                  | 10,87 |
| GCCGGAGTTTTTTTTTTTTTTTCTGACAGA                   | 12,23 |
| GACAGGGACCAAGGAGAATTCTCAGCGTATCC                 | 12,39 |
| CGAGTCGTGCTCGACACCAGCCGCGCGCAGGG                 | 12,55 |
| TTAGTGAGTCGTTTCGATCATCCGGTACTTCG                 | 12,71 |
| TTTTTTTTGAAGGAGTGCGGGCGTTTTTTTT                  | 12,87 |
| CCAAGTCATTTTTTTTTTTTTTTTCGCGATC                  | 16,23 |
| CCCAGTGAAACCTCGTTCACATTAGAATATGG                 | 16,39 |
| TCTTCTCGTATAGCGGGCATCACCTAGAAAT                  | 16,55 |
| AACTACTGCCACCGCATGGAGTTAGGATATCG                 | 16,71 |
| TTTTTTTTCTAATCACTAGCTCCGTTTTTTTT                 | 16,87 |
| AGCTGTTCTTTTTTTTTTTTTTTCTATGTAG                  | 18,23 |
| CTTACATCCTGCTCTAGGGCACTCAAAGCAGG                 | 18,39 |
| TGACGATCGATGCCGAGTTTCCTCAGAAGTG                  | 18,55 |
| GTTTGAACATCCAAAATGCACATCGGGCAC                   | 18,71 |
| TTTTTTTTGCCCCCTACCCCAAGTTTTTTTT                  | 18,87 |
| GGTCAGAATTTTTTTTTTTTTTTTCAACCCCG                 | 22,23 |
| CATAGGTATGAGCTTTCCTATCTTACGCTTAC                 | 22,39 |
| GTCGCATATCCCGTCCTTAGGCAGACGTGC                   | 22,55 |
| GCTATGCTATCATGGTCTCGTGCTTCGAGAAA                 | 22,71 |
| TTTTTTTTCGCAGGGTCTAATATATTTTTTTT                 | 22,87 |
| GTATTACTTTTTTTTTTTTTTTTCTGTTTAC                  | 24,23 |
| AGCTATGGAGGTAGAGGACGAGGTGCCGATCT                 | 24,39 |
| GGTACACGATCGGGTTGAACTTGATTATAAC                  | 24,55 |
| TCAGACGCTATTCGATAACTAAGTGGGGCAC                  | 24,71 |
| TTTTTTTTACCATAACCAGATTGTATTTTTTTT                | 24,87 |
| TAGGTTAATTTTTTTT                                 | 26,23 |
| CGAGGGTTTTCTGGTCGTTATTTCCCAAGGCATCCAAACCAAATGTG  | 26,55 |
| TTTTTTTTGCCTGTTTCGGAACAGCTTGCTCTGCCATGGTGACACG   | 26,87 |
| GAGGCGGCTTTTTTTTTTTTTTTTACGCTTAG                 | 28,23 |
| GCGGAACCGTATAACCGTGGGTAAGTTATGGA                 | 28,39 |
| AGTACGACATCAGCTAGATAGCTGGTTTCCTT                 | 28,55 |
| AGGTGGCCTTGCTTTACGGTGAGATTCCCCAG                 | 28,71 |
| TTTTTTTTCCCGAGCCGGCGCATATTTTTTTT                 | 28,87 |
| TATGGTTTTTTTTTTTTTTTTTTTGCCGAGG                  | 30,23 |
| CGTGCACAGCCCTCAGGGGCTGATCCCGCAAC                 | 30,39 |
| CTAATGAAATCCCTGACTTGACGATCACGTGG                 | 30,55 |
| AGTATAGTTTCCGCCCTAGCCGGCTCCCGGT                  | 30,71 |
| TTTTTTTTAGTGCGTATCCCACGTTTTTTTTT                 | 30,87 |
| CACTTGAGTTTTTTTTTTTTTTTGTGGGAGGCTACCGCTAGGAGAAA  | 32,23 |
| CGAATCAAACCTGTTAGGATACTTTGAAAAGGC                | 32,39 |
| ATGTAGCATATGTGATATCAGTTAATATAAGGACCATAGTGTTCAC   | 32,55 |
| ATATCAAGAGAAACTGATGAACACCCCGCTGC                 | 32,71 |
| TTTTTTTTGTCCCTACCTCTCCCTTTTTTTTT                 | 32,87 |

|                                   |       |
|-----------------------------------|-------|
| GCAATTGCTTTTTTTTTTTTTTTTGGCTGTGAC | 34,23 |
| AATGATTAGCAACCTATAACCTGGATAGGACA  | 34,39 |
| CAGGCTACGGAGCACTGTCCAACATGATAATC  | 34,55 |
| ACTGTACGGCGCGCCTAGTTCGTATATGCTCT  | 34,71 |
| TTTTTTTGGTTGGTTCTAACGATTTTTTTTT   | 34,87 |

## S4.10XY-32H×128B-pore crystal sequences

|                                                  |        |
|--------------------------------------------------|--------|
| CCAGGTTAAGTGGCTCAATCATACTCACGGTT                 | 1,23   |
| AACTGTTGTGCTATGTTACTTAGGGATGG                    | 1,39   |
| TACGAACTCAACGCACGCTCGGGTAGTCTCAA                 | 1,55   |
| GAAGATAGAGAGCATAAATTCGCTAAACCGGA                 | 1,71   |
| AAAGTATCCGCATCTCACTCAGTGATCGAGTA                 | 1,87   |
| TTCATGTCGCCTTTTCGAACGGTGACACACTT                 | 1,103  |
| GTGTTCAITCAGAGTAGCGGAAAATATGGCCGC                | 1,119  |
| TTCGGTGCGCAGCGGGCCGCTGTAACGCTTA                  | 1,135  |
| ATCAGCCCCGGGCTTTTGCTAATACGCTGAGCG                | 3,23   |
| ATGCTGTTGTTGCGGGGTTTCTGAACCGGAAC                 | 3,39   |
| CCGGGCTAATGAAGCCGTGACCCAGAGACTG                  | 3,55   |
| TCTGATGCACCGGGAGCCAGCCACTTAGCTGT                 | 3,71   |
| GTCAGTGTGATCGCGAGTTCCTCTAGCTAGG                  | 3,87   |
| GTGATGCCAAAAGGGTGGATATGGAGCTGGAA                 | 3,103  |
| CGGCTCTGATTTCTAGTGACCTGGTATAATGG                 | 3,119  |
| CGGAGCTACCTGACCTCAATCATACTGCCAC                  | 3,135  |
| GGAAGGATTATCCCTTTAAGAATGATCGCA                   | 5,23   |
| CAGTCTTTGAGATGTTGAACATCTTTGGTTG                  | 5,39   |
| GCGTAAAGATCTCGCATTCTGGTGCCAAAAC                  | 5,55   |
| GCCGACTCGTTCAAGCACTATTATCTGGCTAT                 | 5,71   |
| AAAAGATGTCTGTCAGCCCAAGCTTAGCATAA                 | 5,87   |
| GCGGCTGGACGACCCCGCCGTGCGACGACTGA                 | 5,103  |
| CCGTGAGCCCTGCGCGACAAACGCATATCCT                  | 5,119  |
| CGGCCCGCCAAATTAATAGTCGATTACGCTTC                 | 5,135  |
| GCCTAAAGGTCTTCACGGTAATCGGGGGTG                   | 7,23   |
| ACTCCGGCCTCCTTGGTATATTAGCTTACCCA                 | 7,39   |
| CTCGCGTGGCACGTCTACGACTCGTCGAACGA                 | 7,55   |
| GGACTGTTCTACATAGTGACTTGGACGAGGTT                 | 7,71   |
| TCACTGGGCGCTATACAGGAAACTCGAGGGGC                 | 7,87   |
| TCCCTGTCTGTCGAGCCAGCGACCACTTCTG                  | 7,103  |
| GAGAAAGATGCGGTGGCAGTAGTTGTGATTAG                 | 7,119  |
| CTTGGGGGTGATATACCTCACTAAACTCCTTC                 | 7,135  |
| TAATGTGACTAAGCGTAACTCCAAAGGAAAC                  | 9,23   |
| CAGCTATCCATATTCGATGTAAGCGGACATC                  | 9,39   |
| TATGCGCCCGATATCCGTTCAAACCTAGGGGGC                | 9,55   |
| TTCTGACCAAAGCTCATGAGAATGTAAACAG                  | 9,71   |
| GAACAGCTTAGAGCAGTCAAGTTCGGATACGC                 | 9,87   |
| TACCTATGGACGGGATATGCGACACCATGAT                  | 9,103  |
| CCGGATGAGTTATGAAGATCGTCATTGGGATA                 | 9,119  |
| TACAATCTCGAAGTAAAGCATAGCACCCCTGCG                | 9,135  |
| AAGATAGGGTCACAGCAGTAATACCTTACCT                  | 11,23  |
| TGTTGGACGTAAGCGTGAAATAACGACCAGAA                 | 11,39  |
| AGCACGAGGATTATCACGTGTACCTCGAAATA                 | 11,55  |
| ATCGTTAGTTTCTCGACTGTTCCGAAACAGGC                 | 11,71  |
| AGCGGTAGCCTCCCACTTAACCTATGCCTTGG                 | 11,87  |
| TAACTGATTTTCTCCTGGTCCGCTAGCTGAT                  | 11,103 |
| CTATGGTCTTAATATAACCCTCGGAGGCAAG                  | 11,119 |
| GGGAGAGGGTGAAACAGGCCACCTGGCTCGGG                 | 11,135 |
| GAGTGCCCCCTCGGCAGCCGCCTCGGTTATACTCGTCAAGCCTGCTTT | 13,39  |
| CCATAGCTAACCCGATTGTGCATTCCACGTGAGTCGTACTTAAAGCAA | 13,71  |
| ACGTGGGAGTGCCCGAGCGTCTGAGGTATGGTTIACCCACTATGTTGT | 13,103 |
| CTCAAGTGCTAACAGTACTAATTATCCATAACTGTGCACGTCAGGGAT | 13,135 |
| TCTCACCGGTGGCCGTTGCTACATCAGTTTCTTTGCACTCCTGGGGAA | 17,23  |
| ACTATACTACGCACTGGTTTGGAGGGATTAG                  | 17,39  |
| GCAATTGCTAGGTTGCATTGTAGGCACAATTTTGTATTGATCACATA  | 17,55  |
| CATGGGCAATAAAGCTGTAGCCTGAGGCGCGC                 | 17,71  |
| AGCTGCACCGTGTACCTTGATATTGAGGGACACCTCGTCATTCCGGAT | 17,87  |
| AAACCATACTGAGGGCAGTGGGCGAGATCGGC                 | 17,103 |
| TAATCATTAGTGCTCCCTTAGTTAGTTCATAGTTCATTAGGGGCGGAA | 17,119 |
| ATGGGCTGGTGCCCCAGTACAGTAACCAACC                  | 17,135 |
| GGTGTACCTGTGGGTA                                 | 19,23  |
| GGGCCGAGCGCTGGGCTTACATGTGCAAGTGAAATATATGACTTGGTC | 19,55  |
| GACCAGATCTGTAGAAACCACCAACATCCTCCTTGACACCTTCAAT   | 19,87  |
| TTTTAGTAAACACCCAACAGAGCTGAACTTCCCATGGTCTTCTACTG  | 19,119 |
| TCGTATGATCATAGGATCAAACCTAAATACAGC                | 19,135 |
| GTACCGCCAGTCTTG                                  | 22,8   |

|                                                  |        |
|--------------------------------------------------|--------|
| TCCTTATTGGCGATCGTGCATTCCAATGTTTG                 | 23,23  |
| ATGGCCCGTGGCTTATTAAGACGGCCGGTGTAAACCACATAAAGTCGT | 23,39  |
| CCGCCTCCGGTAGTCAACGCGGAACGTAATGG                 | 23,55  |
| CAGAAAGTCTATACCCGACAAAAACAGATTTGTACCGGGGTGAACAGC | 23,71  |
| ACGTGCGGCTTCTCTGTATCGCCTTGTGTAT                  | 23,87  |
| TATACTTTGCGGGGGGGTTCGAGCGCTCCACTGTAGTGGCCGGCCATC | 23,103 |
| GTGGACTAGAAAAGCGCCGGCAATCTGAATATC                | 23,119 |
| GCTACCTCCGATACGCGAACCAGAACCATTTA                 | 23,135 |
| AGAGTAGGGGCAGTGCTCAGCCAAACAGTGGG                 | 25,23  |
| ACATCTCGGAAAGGTGTCCCAAGTGAAGTAA                  | 25,39  |
| AAAAGGAATTATGAGATCATGTGGGATCCTAA                 | 25,55  |
| AGTTTCTGGTAGACCTCGTAGGCTAGAGCGGT                 | 25,71  |
| GATATCCACGGTACATTCGTTTACTGCACGGA                 | 25,87  |
| ACGAGAGTGCTGGCATAAGCAAGAGAAACCTA                 | 25,103 |
| ACTTGGGGACTAAGATCGTTGCCAATTTTCGC                 | 25,119 |
| GCGATTTCGATGTAGCCGAACGAGATCGCCT                  | 25,135 |
| AGACGACGGATCTCTGCATGCCGGTAGCACC                  | 27,23  |
| GTCAAATATGCGTGCTTTTAAACGCTTTAGACC                | 27,39  |
| CAGCTTGACGCAAGACGCTAATCACTGGGCAG                 | 27,55  |
| GGTCTAGGTTGCAGAAAACCTACCCCTAAGC                  | 27,71  |
| AGCGTAGTAAGGGTTACAAGTTCTGCGGCGG                  | 27,87  |
| CTGTACGAATGAGTCCGGCCTTGACATGACAT                 | 27,103 |
| TCTCCACCCGTCCAACACCAGCAGGATGTCG                  | 27,119 |
| AGCCCAAACTTGACAGTAGTACAGTATCTTT                  | 27,135 |
| TTTCATGGCGGCGATGTCGCCGTTTGCTCGCG                 | 29,23  |
| TGCGTACGGCTTTTATATAGCGTAGACCGGAC                 | 29,39  |
| AACCCCGTAAATCGTAAGAGTCGTTATGCCCC                 | 29,55  |
| CCGGTTCTGCTAGAGTGGGACTGGATCAGATG                 | 29,71  |
| TTCAAGTATTCGGTGACCTCCCCGCATTACAA                 | 29,87  |
| CGCGTTACCAAGTAACGTATGTACGACGCGA                  | 29,103 |
| TGCGAGTGAACGGGTGGATGAATTCGTTCCGG                 | 29,119 |
| GGCCAGGCGATCTAAGTCTGGCGCGTGAGGAC                 | 29,135 |
| ACGTAAGTTGAAGTAGGAAGCTTTTTCTAGCC                 | 31,23  |
| ATAGCATCGACACTACGACCTGCTTTTCGACA                 | 31,39  |
| CGGACTGCATTCTGGACAGTAACTGCATTAAC                 | 31,55  |
| TACGTGCTCCCAACATAAGTACGCTCCTCAGC                 | 31,71  |
| AGTTGAAAATTATCTCGATAAGCAGAAGGACC                 | 31,87  |
| TGTATAACTGGCAAGAGACAAGGCCGCTTCAG                 | 31,103 |
| AAAGGATAGCCGGACCGTATTAATGCCGCGCC                 | 31,119 |
| AACGGTTTCCCGGACCTAGTGTCTATCAAGTC                 | 31,135 |
| TATTCTATGAAACCATCTCGGGTCGAGCGGG                  | 33,23  |
| TCACTGTTGTGACCTACGAGAAGCGTATAGAT                 | 33,39  |
| GTTCCGCGGAATAGCTCACAGGCGAACTACG                  | 33,55  |
| TATGAATTGGTTTAAACGCTCCTCGGGAATTA                 | 33,71  |
| ATACGACAGGTGGCAAAACCCTCCGATGTCA                  | 33,87  |
| GCGCCGCATACCATTCACTGTGAATTTCCAC                  | 33,103 |
| ACCGAGGATTCGCAGGTCCATGGGATTCACCA                 | 33,119 |
| AGCTCGTATACCCCTGATTCTCCATGGCAGC                  | 33,135 |
| GCTTCGGTACAGGTCTGAACCTGGTAGATCACC                | 35,23  |
| ATTAGTGTACCCAGCAGTTCGGCTCCCTTGTTG                | 35,39  |
| GACTCGGGATACCAGTCTCGTGTAAATGCTG                  | 35,55  |
| TTCCGGGGTAAATCAAGCTTTATAAATTTCCG                 | 35,71  |
| ACGCTCTGTTCCAAACTTTAGAGCCGGCCGT                  | 35,87  |
| AATCTCGGATTCCTTAAAAACAGGCGCAATC                  | 35,103 |
| TCATGGCATAAACGAAACCAATCATAACGAGC                 | 35,119 |
| GTGGAGGGAAGTTATCTACTGGCGTTTTCAT                  | 35,135 |
| GTATGATTTTTTTTTTTTTTTTTTTTACCTGT                 | 0,15   |
| AGATGTTCAACCGTGACCTATCTTACGCTTAC                 | 0,31   |
| ACCCGAGCCAACCAAAACACTAATCCGGGTAT                 | 0,47   |
| ATAATAGTTTGAGACTCTCGTGCTTCGAGAAA                 | 0,63   |
| CACTGAGTATAGCCAGCCCGGAAGTTTGAA                   | 0,79   |
| CGCACGGCTACTCGATCTACCCTAGGAGAAA                  | 0,95   |
| ATTTCCGCTCAGTCGTCGAGATTTTCGTTA                   | 0,111  |
| ATCGACTAGCGGCCATGACCATAAGTGTTCAC                 | 0,127  |
| TTTTTTTTGAAGCGTACCCTCCACTTTTTTTT                 | 0,143  |
| GTATTAGCTTTTTTTTTTTTTTTTATGGTTTC                 | 2,15   |
| AAGTAAACCGCTCAGCTCACATTAGAATATGGGATAGCTGGGATATCG | 2,31   |
| GGGGTACCCATCCCTAACAGTGAGCTATTCG                  | 2,47   |

|                                                  |        |
|--------------------------------------------------|--------|
| AGCGAATTCAGTCTCTGGCGCATATGAGCTTTGGTCAGAAGTCTCTA  | 2,63   |
| GAGGGAATCCGGTTAATTCATATTGCCACC                   | 2,79   |
| CACCGTTCCCTAGCTAAGCTGTTCTCCCCGTCCATAGGTATTCATAAC | 2,95   |
| CCAGGTCAAAGTGTGTTGCGGGCGCCCTGCGAA                | 2,111  |
| ACAGCGGCCATTATATCATCCGGTACTTCGAGATTGTATTTTTTT    | 2,127  |
| TTTTTTTTTAAAGCGTTTACGAGCTTTTTTTTT                | 2,143  |
| TTCTTAAATTTTTTTTTTTTTTCTACTTCA                   | 4,15   |
| TCAGAAACTGCGATCACTTTAGGCCCAAGGAG                 | 4,31   |
| CACCAGAAGTTCCGGTGATGCTATTCCAGAAT                 | 4,47   |
| GTGGCTGGAGTTTGGCACGCGAGCTATGTAG                  | 4,63   |
| AGCTTGGGACAGCTAAAGCACGTAGAGATAAT                 | 4,79   |
| CCATATCCTTATGCTACCCAGTGAGCTCGACA                 | 4,95   |
| CGTTTGTCTCCAGCTGTATACAGGTCCGGC                   | 4,111  |
| TATGATTGAGGATATGCTTTCTCGTATATCA                  | 4,127  |
| TTTTTTTTGTGGGACGAAACCGTTTTTTTTTT                 | 4,143  |
| GTATTACTTTTTTTTTTTTTTTGGGGATGA                   | 6,15   |
| CTAATATAAGGTAGAGCGGTGAGAAGTGCGTA                 | 6,31   |
| GGTACACGTGGGTAAGAAAGACTGTGCGAGAT                 | 6,47   |
| CCAAGTCATATTCGAGCAATTGCAGCTTAT                   | 6,63   |
| TAGGTTAAAACCTCGTGAGTCGGCCTGACAGA                 | 6,79   |
| GTCGCTGGCCAAGGCAGTGCAGCTGCCCTCAG                 | 6,95   |
| CGAGGGTTCAGAAGTGCCAGCCGCGCGCAGGG                 | 6,111  |
| TTAGTGAGCTTGCCTCAATGATTATGGGGCAC                 | 6,127  |
| TTTTTTTTGAAGGAGTGCGGGCGTTTTTTTT                  | 6,143  |
| CTTACATCCACCCCGATTACCGTTTTTTTTTTTTTTTAAAAGCCC    | 8,31   |
| AATTCTCATCGTTCGACGAGTCTGTGATGCCAACAGCATGGCTTCAT  | 8,63   |
| GTCGCATAGCCCTCGAGTTTCTCTGTTTACGCATCAGATCGCGATC   | 8,95   |
| GCTATGCTTAATCAACTACTGATCATGGTGGCATCACCTAGAAAT    | 8,127  |
| TTTTTTTTCGCAGGGTTAGCTCCGTTTTTTTT                 | 8,143  |
| TTTTTTTTACGCTTAG                                 | 9,0    |
| TGGAGTTATTTTTTTTTTTTTTGTAGCCACT                  | 10,15  |
| GTTATTTTCGTTTCCTTGAGGCGGCTGCCGAGG                | 10,31  |
| GTTTGAACCTTCTGGTCCAACAGTTGTGCGTTG                | 10,47  |
| CGGAACAGGCCCCCTAAATGCACAATCGGGTT                 | 10,63  |
| GAACCTGAGCCTGTTTCTATCTTCGAGATGCG                 | 10,79  |
| GCGGAACCGCGTATCCTCAGACGTCGGGCAC                  | 10,95  |
| TGACGATCATCAGCTAGACATGAATACTCTGA                 | 10,111 |
| AGGTGGCCTATCCAATAATTAGTACTGTTAG                  | 10,127 |
| TTTTTTTTCCCGAGCCGCACCGAATTTTTTTTT                | 10,143 |
| CTTGACGATTTTTTTTTTTTTTGTGTGAC                    | 12,15  |
| TCCAAACCAAAGCAGGAATAAGGATAAGCCAC                 | 12,31  |
| AGTACGACCTAATCCCGTCCAACATGATAATC                 | 12,47  |
| CAGGCTACTTGTCTTAGGAGGCGGGGTATAG                  | 12,63  |
| GTGGGTAAGCGCGCCTTAACGATGTGGGAGG                  | 12,79  |
| CGCCACTACAACATACCGCACGTCCCCGCA                   | 12,95  |
| CGTGCACAGCCGATCTATCAGTTAATAAAG                   | 12,111 |
| ACTGTACGATCCCTGATAGTCCACGCGTATCG                 | 12,127 |
| TTTTTTTTGGTTGGTTCCTCTCCCTTTTTTTTT                | 12,143 |
| ATGTAGCATTTTTTTTTTTTTTGGAAAGGAC                  | 16,15  |
| GAGTGCAAAGAAACTGGGTACACCTCACTTGC                 | 16,31  |
| CCTACAATTTCCCAGGCCGAGTAGACGTGC                   | 16,47  |
| CGAATCAAAAATTGTGCTCGGCCCGAGGATGT                 | 16,63  |
| ATATCAAGTATGTGATAACAGTCCGTATAGCG                 | 16,79  |
| GACGAGGTGTCCCTCAATCTGGTCGGAAGTTC                 | 16,95  |
| TAACTAAGATCCGAATGACAGGGACCACCGCA                 | 16,111 |
| CTAATGAACTATGAACTACTAAAATCCTATGA                 | 16,127 |
| TTTTTTTTTCCGCCCCCAAGTTTTTTTT                     | 16,143 |
| GGAATGCATTTTTTTTTTTTTTACGGCCAC                   | 18,15  |
| CATATATCAAACATTCATGAAAATAAAAAGC                  | 18,31  |
| TTCCGCGTGACCAAGTAGTATAGTGCAACCTA                 | 18,47  |
| GTGTCAAGCCATTACGACGGGGTACTCTAGC                  | 18,63  |
| GGCGATACATTGAAAAGTGCCCATGGTGACACG                | 18,79  |
| CGACCATGATACACAATACTTGAATTACTTGG                 | 18,95  |
| GATTGCCGAGTAGAATATGGTTTGGAGCACT                  | 18,111 |
| TAGTTTGAGATATTCACACTCGCACTTAGATC                 | 18,127 |
| TTTTTTTTGCTGTATTCAGCCCATTTTTTTT                  | 18,143 |
| GGCGGTACTTTTTTTTTTTTTTGTATAACC                   | 22,15  |
| CGTCTTAAACAAGAACTCCTACTCTCACCTTC                 | 22,31  |

|                                                  |        |
|--------------------------------------------------|--------|
| ATGTGGTTACACCGGCGGGCACTCTCACGTGG                 | 22,47  |
| TTTTTGTACGACTTTTTTCCTTTTAGGTCTAC                 | 22,63  |
| CCCCGGTACAAATCTGAGCTATGGACCATAACC                | 22,79  |
| GCTCGACCGCTGTTTCATGGATATCATGCCAGC                | 22,95  |
| GCCACTACAGTGGAGCTCCACGTGTATGGA                   | 22,111 |
| TCTGGTTCGATGGCCGCCCAAGTGCTACATG                  | 22,127 |
| TTTTTTTTTAAATGGTCACTTGAGTTTTTTTTT                | 22,143 |
| TTGGCTGATTTTTTTTTTTTTTTTCGATCGCC                 | 24,15  |
| TACGCTATCCCACTGTACCGAAGCTGCTGGGT                 | 24,31  |
| CCACATGAGTCCGGTCGCGGCCATTGACTACC                 | 24,47  |
| CCAGTCCCTTAGGATCCCCGAGTCTTGATTTA                 | 24,63  |
| GTAAACGACATCTGATACTTCTGAGGAGAAG                  | 24,79  |
| TACATACGTCCGTGCACAGAGCGTTAAGGAAT                 | 24,95  |
| TCGCAACGTCCGTCGAGAGTATAGCGCTTTC                  | 24,111 |
| GCGCCAGAGCGAAAATTGCCATGAAATAACTT                 | 24,127 |
| TTTTTTTTGTCTCACGAGGTAGCTTTTTTTTT                 | 24,143 |
| CGGCAIGCTTTTTTTTT                                | 26,15  |
| TGATTAGCTTACTTGCACCTGGGAGGTGCTACATAGAATATAGGTCAC | 26,47  |
| GGAACTTGACCGCTTAGCCTACGCTGCCAGCGCGAACTTTAAACC    | 26,79  |
| TGCTGGTGTAGGTTTCTCTTGCTTCCGCCGCATGTCGTATAATGGGTA | 26,111 |
| TTTTTTTTTAGGACGATCTCGTTCGCGACATCCTCCTCGGTAGGGTGT | 26,143 |
| AACGGCGATTTTTTTTTTTTTTTTTTACCCACA                | 28,15  |
| GCGTTAAACGCGAGCAACTTACGTGTAGTGTC                 | 28,31  |
| ACGACTCTGGTCTAAACATGTAAAGCCAGCG                  | 28,47  |
| GGTAGGTTGGGGCATAAGCAGTCCGATGTTGGG                | 28,63  |
| CGGGAGGGCTTAGGGTGGTGGTTCTAGCAG                   | 28,79  |
| TCAAGGCCTTGTAAATGTTCAACTTCTTGCCA                 | 28,95  |
| AATTCATCATGTGTCATGAGCTCTGTTGGGTGTT               | 28,111 |
| TGTACTACCCGAACGATATCCTTTGGTCCGGG                 | 28,127 |
| TTTTTTTTTAAAGATACTCATAAGATTTTTTTTT               | 28,143 |
| ACCAGTTCTTTTTTTTTTTTTTTTCATCGCCG                 | 30,15  |
| AGCAGGTGCGGTGATCTATCCTTCCAACATCTC                | 30,31  |
| CACGACGATGTCGAAACGTACGCATAAGATTT                 | 30,47  |
| CGTCACTTCAGCATTACTTTACGCGCTTGAAC                 | 30,63  |
| GCTCTAAAGCTGAGGAAGAACCGGTCACCGAA                 | 30,79  |
| GCCTTGTACGCGCCGCATCTTTGGGGTCGT                   | 30,95  |
| GATTGGGTCTGAAGCGTAAGCGCGCACCCGTT                 | 30,111 |
| AGACACTAGCTCGTATCTCGACGGTTAATTTG                 | 30,127 |
| TTTTTTTTGACTTGATGCCTGGCCTTTTTTTTT                | 30,143 |
| AAAGCTTCTTTTTTTTTTTTTTTTAGGAGATCCGTCGTCTAGCACGCA | 32,15  |
| GCTTCTCGGGCTAGAAGGGCTGATCCCGCAAC                 | 32,31  |
| AGTTACTGATCTATACTATTTGACGTCTTGCGTCAAGCTGTCTGCAAC | 32,47  |
| GAGGAGCGGTTAATGCTAGCCCGGCTCCCGGT                 | 32,63  |
| TGCTTATCTAATCCCCTAGGACCTAACCCCTACTACGCTGGACTCAT  | 32,79  |
| TCACAGTGGGTCTTCACTGACACCCTTTTT                   | 32,95  |
| ATTAATACGTGGAAATTCGTACAGTTGGACGGGTGGGAGATGTCAAGT | 32,111 |
| GGAGAATCGGCGCGGCCAGAGCCGAGGTCAGG                 | 32,127 |
| TTTTTTTTGCTGCCATTGTGGGCTTTTTTTTTT                | 32,143 |
| ACCCGAGATTTTTTTTTTTTTTTTGCCTGCC                  | 34,15  |
| AGCCGAACCCCGCTCGTAACTGGATAGGACA                  | 34,31  |
| GCCTGTGACACAAGGGCGAGATGTTCTCATAA                 | 34,47  |
| TATAAAGCCGTAGTTCAGTTCGTATATGCTCT                 | 34,63  |
| GAGGTGGTCCGGAATCAGAACTATGTACCG                   | 34,79  |
| CTGGTTTTTGACATCGGATACTTTGAAAAGGC                 | 34,95  |
| CCCATGGAGATTGCGCACTCTCGTATCTTAGT                 | 34,111 |
| GCCAGTAGTGGTGAATATGAACACCCCGCTGC                 | 34,127 |
| TTTTTTTTTATGAAAACCGAATCGCTTTTTTTTT               | 34,143 |

## S4.11XY-8H×4H×96B-channel crystal sequences

|                                                  |        |
|--------------------------------------------------|--------|
| CCAGGTTAAGTGGCTCAATCATACTCACGGTT                 | 1,23   |
| AACTGTTGTGCTATGTTACTTAGGGATGG                    | 1,39   |
| TACGAACTCAACGCACGCTCGGGTAGTCTCAA                 | 1,55   |
| GAAGATAGAGAGCATAAATTCGCTAAACCGGA                 | 1,71   |
| AAAGTATCCGCATCTCACTCAGTGATCGAGTATTCATGTCGCCTTTTC | 1,87   |
| GAACGGTGACACACTTGTGTTCAATCAGAGTA                 | 1,103  |
| GCGGAAATATGGCCGCTTCGGTGCGCAGCGGG                 | 3,23   |
| CCGCCTGTAACGCTTAATCAGCCCGGGCTTTT                 | 3,39   |
| GCTAATACGCTGAGCGATGCTGTTGTTGCGGG                 | 3,55   |
| GTTTCTGAACCGGAACCCGGGCTAATGAAGCC                 | 3,71   |
| GTGACCCAGAGACTGTCTGATGCACCGGGAGCCAGCCACTTAGCTGT  | 3,103  |
| GTCAGTGTGATCGCGAGTTCCTCTAGCTAGG                  | 5,23   |
| GTGATGCCAAAAGGGTGGATATGGAGCTGGAA                 | 5,39   |
| CGGCTCTGATTCTAGTGACCTGGTATAATGG                  | 5,55   |
| CGGAGCTACCTGACCTCAATCATACTGCCAC                  | 5,71   |
| GGAAGGATTCATCCCTTTAAGAATGATCGCA                  | 7,23   |
| CAGTCTTTGAGATGTTGAACATCTTTTGGTTG                 | 7,39   |
| GCGTAAAGATCTCGATTCTGGTGCCAAAAT                   | 7,55   |
| GCCGACTCGTTCAAGCACTATATCTGGCTAT                  | 7,71   |
| AAAAGATGTCTGTGACGCCAAGCTTAGCATAA                 | 9,23   |
| GCGGCTGGACGACCCCGCGTGCACGACTGA                   | 9,39   |
| CCGTCGAGCCCTGCGCGACAAACGCATATCCT                 | 9,55   |
| CGGCCCGCCAAATTAATAGTCGATTACGCTTC                 | 9,71   |
| GCCTAAAGGTCCTTCCACGGTAATCGGGGGTG                 | 11,23  |
| ACTCCGGCCTCCTTGGTATATTAGCTTACCCA                 | 11,39  |
| CTCGCGTGGCACGTCTACGACTCGTCGAACGA                 | 11,55  |
| GGACTGTTCTACATAGTGACTTGGACGAGGTT                 | 11,71  |
| TCACTGGGCGCTATACAGGAACTCGAGGGGC                  | 13,23  |
| TCCCTGTCTGTCGAGCCAGCGACCACTTCTG                  | 13,39  |
| GAGAAAGATGCGGTGGCAGTAGTTGTGATTAG                 | 13,55  |
| CTTGGGGGTGATATACCTCACTAAACTCCTTCTAATGTGACTAAGCGT | 13,71  |
| TAACTCCAAAGGAAACCAGCTATCCCATATTC                 | 13,87  |
| GATGTAAGCGGACATCTATGCGCCCGATATCC                 | 13,103 |
| GTTCAAAAGTGGGGCTTCTGACCAAAGCTCA                  | 15,23  |
| TGAGAATTGTAACAGGAACAGCTTAGAGCAG                  | 15,39  |
| TCAAGTTCGGATACGCTACCTATGGACGGGGA                 | 15,55  |
| TATGCGACACCATGATCCGGATGAGTTATGAAGATCGTCATTGGGATA | 15,87  |
| TACAATCTCGAAGTAAAGCATAGCACCCCTGCG                | 15,103 |
| AAGATAGGGTCACAGCAGTAATACCTCTACCT                 | 17,23  |
| TGTTGGACGTAAGCGTGAATAACGACCAGAA                  | 17,39  |
| AGCACGAGGATTATCAGGTGACCTCGAAATA                  | 17,55  |
| ATCGTTAGTTTCTCGACTGTTCCGAAACAGGC                 | 17,71  |
| AGCGGTAGCCTCCCCTTAACCTATGCCTTGGTAACTGATTTTCTCCT  | 17,87  |
| GGTTCGGCTAGCTGATCTATGGTCCTTAATAT                 | 17,103 |
| AACCCTCGGAGGCAAGGGGAGAGGGTGAAACA                 | 19,23  |
| GGCCACTGGCTCGGGGAGTGCCCCCTCGGCA                  | 19,39  |
| GCCGCTCGGTTATACTCGTCAAGCCTGCTTT                  | 19,55  |
| CCATAGCTAACCCGATTGTGCATTCCACGTGA                 | 19,71  |
| GTGCTACTTAAAGCAAACGTGGGAGTGCCCGAGCGTCTGAGGTATGGT | 19,103 |
| TTACCCACTATGTTGTCTCAAGTGCTAACAGT                 | 21,23  |
| ACTAATTATCCATAACTGTGCACGTCAGGGAT                 | 21,39  |
| TCTCACCGGTGGCCGTTGCTACATCAGTTTCT                 | 21,55  |
| TTGCACTCCTGGGAAACTATACTTACGCACT                  | 21,71  |
| GGTTTGGAGGGATTAGGCAATTGCTAGGTTGC                 | 23,23  |
| ATTGTAGGCACAATTTTGTATTCGATCACATA                 | 23,39  |
| CATGGGCAATAAAGCTGTAGCCTGAGGCGCGC                 | 23,55  |
| AGCTGCACCGTGTACCTTGATATTGAGGGAC                  | 23,71  |
| ACCTCGTCATTCGGATAAACATACTGAGGGC                  | 25,23  |
| AGTGGGCGAGATCGGCTAATCATTAGTGCTCC                 | 25,39  |
| CTTAGTTAGTTCATAGTTCATTAGGGGCGGAA                 | 25,55  |
| ATGGGCTGGTGCCCACTACAGTAACCAACC                   | 25,71  |
| GGTGTACCTGTGGGTAGGGCCGAGCGCTGGGC                 | 27,23  |
| TTACATGTGCAAGTGAATAATATGACTTGGTC                 | 27,39  |
| GACCAGATCTGTAGAAACCACCAACATCCTC                  | 27,55  |
| CTTGACACCTTTCAATTTTAGTAAACACCCA                  | 27,71  |
| ACAGAGCTGAACCTCCCATGGTCGTTCTACTG                 | 29,23  |



|                                                  |        |
|--------------------------------------------------|--------|
| TCGTATGATCATAGGATCAAACATAAATACAGC                | 29,39  |
| GTACCGCCAGTCTTGTCCTTATTGGCGATCG                  | 29,55  |
| TGCATTCCAATGTTTGATGGCCGCGTGGCTTATTAAGACGGCCGGTGT | 29,71  |
| AACCACATAAAGTCGTCCGCCCTCCGGTAGTCA                | 29,87  |
| ACCGGAACGTAATGGCAGAAAGTCTATAACC                  | 29,103 |
| GACAAAAACAGATTTGTACCGGGGTGAACAGC                 | 31,23  |
| ACGTGCGGCTTCTCCTGTATCGCCTTGTGTAT                 | 31,39  |
| TATACTTTGCGGGGGGGTTCGAGCGCTCCACT                 | 31,55  |
| GTAGTGGCCGGCCATCGTGGACTAGAAAGCGCCGCAATCTGAATATC  | 31,87  |
| GCTACCTCCGATACGCGAACCGAACCATTTA                  | 31,103 |
| GTATGATTTTTTTTTCAAATCTG                          | 0,15   |
| AGATGTTCAACCGTGAGTTTGAACCTGTTTAC                 | 0,31   |
| ACCCGAGCCAACCAAACCGCACGTCCCCCGCA                 | 0,47   |
| ATAATAGTTGAGACTGAACTTGATTCATAAC                  | 0,63   |
| CACTGAGTATAGCCAGTAGTCCACGATGGCCG                 | 0,79   |
| GACATGAATACTCGATGTCGCATATTACTTCG                 | 0,95   |
| TTTTGAAAAGGCGAGGTAGCTTTT                         | 0,107  |
| GCACCGAATTTTTTTTGGAAAGTTC                        | 2,15   |
| AAGTAAACCCCGCTGCCCAAGTGAGCTCGACA                 | 2,31   |
| AACAGCATCCATCCCTTCATACGACAAGAAT                  | 2,47   |
| AGCGAATCCCAGCACTCTTCTCGTATATCA                   | 2,63   |
| GTGGCTGGTCCGGTTTGGAAATGCAACGACTTT                | 2,79   |
| ATGAACACACAGCTAATGGAGTTAGATGTCCG                 | 2,95   |
| TTTTACTCTGATCCGCGTTTTT                           | 2,107  |
| GAGGGAATTTTTTTTACCACA                            | 4,15   |
| GGGCTGATCCTAGCTACTTGGCCCAAGGAG                   | 4,31   |
| CCAGGTCAAAAAGCCACATGTAATCTAGCAG                  | 4,47   |
| TAGCCCGGCCATTATACACGCGAGCTATGTAG                 | 4,63   |
| TTTTTTTGGCTTCATGTGCAAGTTTTTTTT                   | 4,79   |
| TTCTTAAATTTTTTTATCCGAAT                          | 6,15   |
| CCATATCCTGCGATCACATCTTTGGGGTCGT                  | 6,31   |
| CACCAGAATTCCAGCTCGCCACTCTATGAAC                  | 6,47   |
| TATGATTGAGTTTTGGCTCGACGGTTAATTTG                 | 6,63   |
| TTTTTTTGTGGGACGCAGCCATTTTTTTTT                   | 6,79   |
| GGTCAGAATTTTTTTGGGGATGA                          | 8,15   |
| CGCACGGCTGAGCTTTCCAACCAAATTTGTG                  | 8,31   |
| CATAGGTATCAGTCGTAAGACTGTGCGAGAT                  | 8,47   |
| ATCGACTATCCCGTCTGCCATGGTGACACG                   | 8,63   |
| TTTTTTTGAAGCGTAGAGTCGGCTTTTTTTT                  | 8,79   |
| AGCTTGGGTTTTTTTTTCGCGATC                         | 10,15  |
| CTAATATATTATGCTAGTGGGTAAGTTATGGA                 | 10,31  |
| CGTTTGTCTGGGTAAGGGCATCACCTAGAAAT                 | 10,47  |
| CCAAGTCAAGGATATGCGGTGAGATTCCCCAG                 | 10,63  |
| TTTTTTTAAACCTCGTAGCTCCGTTTTTTTT                  | 10,79  |
| ATTACCGTTTTTTTTTGGGCCAT                          | 12,15  |
| GTGCTGGCACCCCGCGAGGGTTCCCGAGCC                   | 12,31  |
| CGAGTCGTCAGAAGTGACAGGCGGCGCTCAGC                 | 12,47  |
| TTAGTGAGTCGTTGAGAGGGCGGCATCGGGTT                 | 12,63  |
| TCACATTAGAAGGAGTTCAGAAACCTCCCGGT                 | 12,79  |
| GGCGCATAACGCTTAGTCCCACGTTTGCTTTA                 | 12,95  |
| TTTTGGATATCGGGGGTCACTTTT                         | 12,107 |
| AGTTTCCTTTTTTTTGTAGCCACT                         | 14,15  |
| AGCTGTTCCGCCCTCGCCTATCTTACGCTTAC                 | 14,31  |
| AACTACTGCTGCTCTACAACAGTTGTGCGTTG                 | 14,47  |
| TGACGATCCTAATCACCTCGTGCTTCGAGAAA                 | 14,63  |
| GATAGCTGTATCCCAACTATCTTCGAGATGCG                 | 14,79  |
| GCTATGCTGAATATGGCTACCGCTATCAGCTA                 | 14,95  |
| TTTTCGCAGGGTACCGTTCTTTT                          | 14,107 |
| GTATTACTTTTTTTTGCCCCCTA                          | 16,15  |
| CGAATCAAAGGTAGAGTTTTTGTGAGGAGAAG                 | 16,31  |
| GGTACACGTATGTGATAATCTCAGCGTATCC                  | 16,47  |
| ATATCAAGTATTTGAAAGAGTATAGCGCTTTC                 | 16,63  |
| TAGGTTAAGTCCCTCATCATCCGGATCATGGT                 | 16,79  |
| ATCAGTTACCAAGGACGCCACTACGCGTATCG                 | 16,95  |
| TTTTAGGAGAAAAGATTGTATTTT                         | 16,107 |
| CCTCTCCCTTTTTTTGTATAGCG                          | 18,15  |
| GTTATTTCTGTTTCACAGCTCTGTTCTATGA                  | 18,31  |
| CTTGACGATTCTGGTCGACAGGGACCACCGCA                 | 18,47  |

|                                   |        |
|-----------------------------------|--------|
| CGGAACAGAAAGCAGGGGCGGTACCAAACATT  | 18,63  |
| TCAGACGCGCCTGTTCCCCCAAGGTTTCCTT   | 18,79  |
| GACCATAGACCATAACCATGTGGTTCCATTACG | 18,95  |
| TTTTATATTAAGCTTACATCTTTT          | 18,107 |
| CACTTGAGTTTTTTTTGGAAGGAC          | 20,15  |
| GGGCACTCACTGTAGGGTACACCTCACTTGC   | 20,31  |
| ATGTAGCATGCCGAGGGCCGAGTAGACGTGC   | 20,47  |
| AATGCACAAGAACTGATCTGGTCATTGAAAG   | 20,63  |
| TTTTTTTTTCACGTGGAACAGTCCTTTTTTTT  | 20,79  |
| GCAATTGCTTTTTTTTCTGACAGA          | 22,15  |
| CGTGCACAGCAACCTAGACGAGGTGCCGATCT  | 22,31  |
| CAGGCTACATCCCTGACCAGCCGCGCAGGG    | 22,47  |
| AGTATAGTGCGCGCCTTAACTAAGTGGGGCAC  | 22,63  |
| TTTTTTTTAGTGCGTAGCGGGCCGTTTTTTTTT | 22,79  |
| CCCCGGTATTTTTTTCTAATCCC           | 24,15  |
| AATGATTAGCTGTTCAATCCTTCCAACATCTC  | 24,31  |
| GCTCGACCGGAGCACTCCTACAATAGCTTTAT  | 24,47  |
| ACTGTACGAGTGGAGCCTTTACGCGCTTGAAC  | 24,63  |
| TTTTTTTTGGTTGGTTGTGCAGCTTTTTTTTTT | 24,79  |
| TATGGTTTTTTTTTTTACAACATA          | 26,15  |
| CATATATTGCCCTCAGACACTGACACCCTTTT  | 26,31  |
| CTAATGAAGACCAAGTTAATTAGTACGGCCAC  | 26,47  |
| TACTAAAATCCGCCCCAGAGCCGAGGTCAGG   | 26,63  |
| TTTTTTTTGGGTGTTGAGTGCAATTTTTTTTT  | 26,79  |
| CTCGGCCCTTTTTTTTCTTGCCCTC         | 28,15  |
| TAGTTTGAGCCAGCGATTTCCGCTAAGCGTT   | 28,31  |
| TGGTGGTTGCTGTATTAGGTGGCCGTATAACC  | 28,47  |
| GCGGCCATGAGGATGTGTATTAGCGTTCCGGT  | 28,63  |
| CGTCTTAATAAGCCACAGCTATGGTCCGGCAC  | 28,79  |
| ACTTTCTGACACCGGCGCATCAGACAGTCTCT  | 28,95  |
| TTTTGGGTATAGAGTACGACTTTT          | 28,107 |
| CGACCATGTTTTTTTTGCTGTGAC          | 30,15  |
| GGCGATACCAGTAGAATAACCTGGATAGGACA  | 30,31  |
| AATAAGGAATACACAAGTCCAACATGATAATC  | 30,47  |
| GATTGCCGCGATCGCCAGTTCGTATATGCTCT  | 30,63  |
| GGAGGCGGGATATCTACTAACGATGTGGGAGG  | 30,79  |
| TCTGGTTCTGACTACCGATACTTTAAGTGTGT  | 30,95  |
| TTTTTAAATGGTGCGGAACCTTTT          | 30,107 |

## S5.1 Offset-ZX-6H×6H×64B-cuboid crystal sequence

|                                                  |       |
|--------------------------------------------------|-------|
| CCAGGTTAAGTGGCTCAATCATACTCACGGTAACTGTTGTGCCTAT   | 1,23  |
| GTTTACTTAGGGATGGTACGAACTCAACGCAC                 | 1,39  |
| GCTCGGGTAGTCTCAAGAAGATAGAGAGCATA                 | 1,55  |
| AATTCGCTAAACCGGAAAAGTATCCGCATCTC                 | 1,71  |
| ACTCAGTGATCGAGTATTCATGTCCCTTTTC                  | 3,23  |
| GAACGGTGACACACTTGTGTTCAATCAGAGTA                 | 3,39  |
| GCGGAAATATGGCCGCTTCGGTGCGCAGCGGG                 | 3,55  |
| CCGCCTGTAACGCTTAATCAGCCCGGGCTTTT                 | 3,71  |
| GCTAATACGCTGAGCGATGCTGTTGTTGCGGG                 | 5,23  |
| GTTTCTGAACCGGAAACCGGGCTAATGAAGCC                 | 5,39  |
| GTGACCCAGAGACTGTCTGATGCACCGGGAGCCAGCCACTTAGCTGT  | 5,71  |
| GTCAGTGTGATCGCGAGTTCCTCTAGCTAGG                  | 7,23  |
| GTCAGTGTGATCGCGAGTTCCTCTAGCTAGG                  | 7,39  |
| TGACCTGGTATAATGGCGGAGCTACCTGACCT                 | 7,55  |
| CAATCATACTGCCACGGAAGGATTCATCCCT                  | 9,23  |
| TTTAAGAATGATCGCACAGTCTTTGAGATGTT                 | 9,39  |
| GAACATCTTTTGGTTGGCGTAAAGATCTCGCA                 | 9,55  |
| TTCTGGTGCCAAAAGTGGCGACTCGTTCAAGC                 | 9,71  |
| ACTATTACTGGCTATAAAAGATGTCTGTCAGCCAAAGCTTAGCATAA  | 11,23 |
| GCGGCTGGACGACCCCGCCGTGCGACGACTGA                 | 11,39 |
| CCGTCGAGCCCTGCGCGACAAACGCATATCCT                 | 11,55 |
| CGGCCCGCCAAATTAATAGTTCGATTACGCTTC                | 11,71 |
| GCCTAAAGGTCTTCCACGGTAATCGGGGGTACTCCGGCCTCCTGG    | 13,23 |
| TATATTAGCTTACCCACTCGCGTGGCAGCTCT                 | 13,39 |
| ACGACTCGTCAACGAGGACTGTTCTACATAG                  | 13,55 |
| TGACTTGGACGAGGTTTCACTGGGCGCTATAC                 | 13,71 |
| AGGAAACTCGAGGGGCTCCCTGTCTGTGCGAGC                | 15,23 |
| CCAGCGACCACTTCTGGAGAAAGATGCGGTGG                 | 15,39 |
| CAGTAGTTGTGATTAGCTTGGGGGTGATATACT                | 15,55 |
| CTCACTAAACTCCTTCTAATGTGACTAAGCGT                 | 15,71 |
| TAACTCAAAGGAAACCAGCTATCCATATTC                   | 17,23 |
| GATGTAAGCGGACATCTATGCGCCCGATATCC                 | 17,39 |
| GTTCAAAGTGGGGGCTTCTGACCAAAGCTCATGAGAATTGTAAACAG  | 17,71 |
| GAACAGCTTAGAGCAGTCAAGTTCGGATACGC                 | 19,23 |
| TACCTATGGACGGGATATGCGACACCATGATCCGGATGAGTTATGAA  | 19,39 |
| GATCGTCATTGGGATATAAATCTCGAAGTAA                  | 19,55 |
| AGCATAGCACCCCTGCGAAGATAGGGTACAGC                 | 21,23 |
| AGTAATACCTTACCTTGTGGACGTAAGCGT                   | 21,39 |
| GAAATAACGACCAGAAAGCACGAGGATTATCA                 | 21,55 |
| CGTGTACCTCGAAATAATCGTTAGTTTCTCGA                 | 21,71 |
| CTGTTCCGAAACAGGACGGTAGCCTCCCCTAACCTATGCCTTGG     | 23,23 |
| TAACTGATTTTCTCCTGGTTCGGCTAGCTGAT                 | 23,39 |
| CTATGGTCTTAATATAACCCTCGGAGGCAAG                  | 23,55 |
| GGGAGAGGGTGAAACAGGCCACCTGGCTCGGG                 | 23,71 |
| GAGTGCCCCCTCGGCAGCCGCTCGGTTATACTCGTCAAGCCTGCTTT  | 25,23 |
| CCATAGCTAACCCGATTGTGCATTCCACGTGA                 | 25,39 |
| GTCGTAATAAGCAAACGTGGGAGTGCCCGA                   | 25,55 |
| GCGTCTGAGGTATGGTTTACCCACTATGTTGT                 | 25,71 |
| CTCAAGTGCTAACAGTACTAATATCCATAAC                  | 27,23 |
| TGTGCACGTCAGGGATTCTACCGGTGGCCGT                  | 27,39 |
| TGCTACATCAGTTTCTTTGCCTCTGGGGAA                   | 27,55 |
| ACTATACTTACGCACTGGTTTGGAGGGATTAG                 | 27,71 |
| GCAATTGCTAGGTTGCATTGTAGGCACAATTT                 | 29,23 |
| TTGATTGATCACAATACATGGGCAATAAAGCT                 | 29,39 |
| GTAGCCTGAGGCGCGCAGCTGCACCTTGATATTGAGGGAC         | 29,71 |
| ACCTCGTCATTTCGGATAAACATACTGAGGGC                 | 31,23 |
| AGTGGGCGAGATCGGCTAATCATTAGTGCTCCCTTAGTTAGTTCATAG | 31,39 |
| TTCATTAGGGGCGGAAATGGGCTGGTGCCCA                  | 31,55 |
| CGTACAGTAACCAACCGGTGTACCTGTGGGTA                 | 33,23 |
| GGGCCGAGCGCTGGGCTTACATGTGCAAGTGA                 | 33,39 |
| AATATATGACTTGGTGCACAGATCTGCTAGA                  | 33,55 |
| AACCACCAACATCCTCCTTGACACCTTTCAAT                 | 33,71 |
| TTTTAGTAAACACCAACAGAGCTGAACTTCCCATGGTCTGTTCTACTG | 35,23 |
| TCGTATGATCATAGGATCAAACTAAATACAGC                 | 35,39 |
| GTACCGCCAGTTCTTGTCTTATTGGCGATCG                  | 35,55 |
| TGCATTCGAATGTTGATGGCCGCGTGGCTTA                  | 35,71 |

|                                                    |       |
|----------------------------------------------------|-------|
| GTATGATTA AAAAGCCCGGGCTGATACAGCTAACAGGTC ACTGACAGA | 0,15  |
| CTATCTCATAGGACACAACAGTTAACCGTGAATAATAGTGGGGTCGT    | 0,47  |
| TTTTTTTTGGCTTCATTAGCCCCGGTATGCTCTCTCGACGGTAAATTTG  | 0,79  |
| GACATGAATTTTTTTTT                                  | 2,15  |
| GCACCGAAGTGC GTTAGTTCGTAGAAAAGGCTATGATTGTGCGATCA   | 2,47  |
| TTTTTTTTGAGATGCGGATACTTCCCGCTGCAGATGTT CAGTTTTGG   | 2,79  |
| AACAGCAITTTTTTTTT                                  | 4,15  |
| GTGGCTGGTACTCTGAATGAACACCCCGCAACACACTGACACCCTTTT   | 4,47  |
| CGTTTGCTTTTTTTTTTTTTTTTTTCGCTCAGCGTATTAGCGTTCGGT   | 6,15  |
| CCATATCCAGGATATGTGGAGTTAGATGTCCG                   | 6,31  |
| CAGAGCCGTTCCAGCTTCAGAAACCTCCCGTGCATCAGACAGTCTCT    | 6,47  |
| AGCTTGGGCTAGAAATGGTCAGAAGCCCCCTA                   | 6,63  |
| GAGGGAACTTTTTTTTTTTTTTTTTACTCGATCACTGAGTAAGTGTGT   | 8,15  |
| AAAGACTGCCTAGCTAAGTTTCTCCTCAGAAGTG                 | 8,31  |
| TAGCTCCGAACATCTCCACCGTTTCGCGGCCATATTTCCGCTAAGCGTT  | 8,47  |
| GAGTCGGCAGGT CAGGA ACTACTGGAAGGAGT                 | 8,63  |
| TTTTTTTTGCTTGAACACAGGCGGTTTTTTTT                   | 8,79  |
| ATCCTTCTTATGCTAGGGGTCACGAGCCACTTAACCTGGCCATCCCT    | 10,15 |
| CGCACGGCGGGGATGACTTTAGGCTGGGTAAG                   | 10,31 |
| CTTTACGCTCAGTCGTAAGTAAACTTGAGACTACCCGAGCTCCGGTTT   | 10,47 |
| ATCGACTATGCGAGATCGAGTCGTAACCTCGT                   | 10,63 |
| TTTTTTTTGAAGCGTAAGCGAATTTTTTTTTTT                  | 10,79 |
| ATTACCGTACGCTTAGCATCTTTTATAGCCAG                   | 12,15 |
| GCCGGAGTACCCCCGCGGAACAGAGGAGAAA                    | 12,31 |
| AACAGTCCCCAAGGAGCCAGCCGCGCGCAGGG                   | 12,47 |
| GGCGATACTATGTAGGACCATAGTGTTCAC                     | 12,63 |
| TTTTTTTTGGATATCGGCGGGCCGTTTTTTTT                   | 12,79 |
| GACAGGGATTTTTTTTTTTTTTTTTTGTGGGACG                 | 14,15 |
| CACGCGAGGCTCGACAGCTATGCTAGGTAGAG                   | 14,31 |
| CCCCAAGAGACGTGCTTCTTAAACAACCAAA                    | 14,47 |
| CCCAGTGAGTATATCAGTTATTTCTATTTCTGA                  | 14,63 |
| TTTTTTTTGTATAGCGCACCAAGAATTTTTTTTT                 | 14,79 |
| GATAGCTGTTTTTTTTTTTTTTTTTTCGCGATC                  | 16,15 |
| TCTTCTCGAATATGGAGCTGTTCTCCCCGTC                    | 16,31 |
| AATTCTCACACCCGAGGCATCACCCATTATA                    | 16,47 |
| TCACATTACTGTTTACTGACGATCGTGGGAGG                   | 16,63 |
| CGAGGGTTTTTTTTTTTTTTTTTTGTTCCTT                    | 18,15 |
| GTCGCATACTTGCTCGCAATTGCTATGTGAT                    | 18,31 |
| TCATCCGGATCATGGTCTTACATCTGAGCTTT                   | 18,47 |
| TAGGTTAATTCATAACGTGCAGCTGCGCGCCT                   | 18,63 |
| GAAC TTGATTTTTTTTTTTTTTTTTTGCCTCG                  | 20,15 |
| GTCCAACAGCGTATCCACTTGAGATCCCTGA                    | 20,31 |
| AGATTGTAACGCTTACGTCGCTGGCTAATCAC                   | 20,47 |
| CTAACGATTACTTCGATGTAGCAAGTGCCTA                    | 20,63 |
| TTTTTTTTTCGAGAAATAGTGAGTTTTTTTT                    | 20,79 |
| CCTATCTCCAAGGCAGTTTGAACGGAAGGAC                    | 22,15 |
| GCGGAACCGCTGTGACGGGCACTCATCGGGTT                   | 22,31 |
| CTCGTGCTATCAGCTACTAATATATCGTTCGA                   | 22,47 |
| AGGTGGCCTGATAATCAGTACGACACCATAAC                   | 22,63 |
| TTTTTTTTCCCGAGCCCCAAGTCATTTTTTTTT                  | 22,79 |
| GAGGCGCCTAATCCCTACCGTGCCTGTTT                      | 24,15 |
| CTTGACGAGTATAACCTACTAAAATCCTATGATCATAACGACAAGAACT  | 24,31 |
| TCCCACGTAAAGCAGGATCAGTTAATATTAAG                   | 24,47 |
| TGCCCATGTGCGGCACGCGGTACCAAACATTGGAATGCATTTTTTTTT   | 24,63 |
| TTTTTTTTAGCTTTATCCTCTCCCTTTTTTTTT                  | 24,79 |
| TAATTAGTTTTTTTTTTTTTTTTTTCGACGGGT                  | 26,15 |
| AATGCACAGTTATGGA ACTGTACGGCCAGCGCTCGGCCGACCAAGT    | 26,31 |
| GAGTGCAATCACGTGGGTATTACTTTCTGGTC                   | 26,47 |
| GTGGGTAATCCCCAGCATATATTGAGGATGTTGGTGGTTTTTTTTTT    | 26,63 |
| TTTTTTTTTACAACATAGGTACACGTTTTTTTTT                 | 26,79 |
| CCTACAATTTTTTTTTTTTTTTTTTCTGCTCTA                  | 28,15 |
| CGGTGAGAAAATGTGGACGAGGTGCCGATCTCGCCCACTTTCCGCC     | 28,31 |
| ATATCAAGACGGCCACCATAGGTATATCCCAA                   | 28,47 |
| TCCA AACCGTCCCTCACTAATGAAGGAAGTT CAGCTCTGTTGGGTGTT | 28,63 |
| AATGATTACGATCGCCAATAAGGATTTTTTTTTTTTTTTTGGCAACCTA  | 30,31 |
| CGACCATGCTATGAAC TAAAGGGAGCACTCGAATCAAGTGACACG     | 30,63 |
| TTTTTTTTATCCGAAT                                   | 31,0  |
| ACATGTAAGCCCTCAGTATGGTTTTTTTTTTTTTTTTTACTGTTAG     | 32,31 |

|                                                  |       |
|--------------------------------------------------|-------|
| GTGTCAAGTGGGGCACCAGCCATTCACCTTGCCGTGCACAAGAACTG  | 32,63 |
| TTTTTTTATTGAAAGAGTATAGTTTTTTTT                   | 32,79 |
| TTTTTTTGGTTGGTT                                  | 33,0  |
| TAGTTTGATACCCACAGGTACACCCAGTAGAACAGGCTACTGCCGAGG | 34,31 |
| GCGCCATTCTAGCAGATCTGGTCGCTGIATTAGCTATGGTTGCTTTA  | 34,63 |
| TTTTTTTAAAGCCACTCAGACGCTTTTTTTT                  | 34,79 |
